# Supplementary material for: Analysis of Chromosome 3P Genes Associated With Clinical Staging of Small Cell Lung Cancer and Prediction of Targeted Drugs
Source: Research Square preprint supplement (doi:10.21203/rs.3.rs-1050186/v1), 2021-11-16
Supplement: Supplementary file 4 [file 395e9c509a26492203d15949.xlsx]

## Sheet: WGCNA.enrichGO
ONTOLOGY	ID	Description	GeneRatio	BgRatio	pvalue	p.adjust	qvalue	geneID	Count
BP	GO:1902749	regulation of cell cycle G2/M phase transition	29/797	217/18866	4.08529e-08	0.000173465	0.000158837	ATAD5/AURKA/AURKB/BRCA1/BRD4/CDC25A/CDC25B/CDC7/CDK5RAP2/CDK5RAP3/CENPJ/CEP152/CEP72/CEP76/CEP78/CHEK1/CLSPN/FHL1/ODF2/PAXIP1/PLK1/PRKACA/PRKAR2B/PSMA5/PSME1/PSME2/RAB11A/RBX1/USP47	29
BP	GO:1901990	regulation of mitotic cell cycle phase transition	45/797	448/18866	7.13115e-08	0.000173465	0.000158837	ANLN/ATAD5/AURKA/AURKB/BRCA1/BRD4/BTN2A2/BUB1/BUB1B/CASP2/CDC25A/CDC25B/CDC27/CDC7/CDCA5/CDK5RAP2/CDK5RAP3/CDT1/CENPE/CENPJ/CEP152/CEP72/CEP76/CEP78/CLSPN/CNOT3/EZH2/FBXO31/FBXO7/FHL1/ODF2/PCBP4/PLK1/PPP1R9B/PRKACA/PRKAR2B/PSMA5/PSME1/PSME2/RAB11A/RBX1/USP44/USP47/XPC/ZFP36L1	45
BP	GO:1901987	regulation of cell cycle phase transition	47/797	486/18866	1.14603e-07	0.000185848	0.000170176	ANLN/ATAD5/AURKA/AURKB/BRCA1/BRD4/BTN2A2/BUB1/BUB1B/CASP2/CDC25A/CDC25B/CDC27/CDC7/CDCA5/CDK5RAP2/CDK5RAP3/CDT1/CENPE/CENPJ/CEP152/CEP72/CEP76/CEP78/CHEK1/CLSPN/CNOT3/EZH2/FBXO31/FBXO7/FHL1/ODF2/PAXIP1/PCBP4/PLK1/PPP1R9B/PRKACA/PRKAR2B/PSMA5/PSME1/PSME2/RAB11A/RBX1/USP44/USP47/XPC/ZFP36L1	47
BP	GO:0044839	cell cycle G2/M phase transition	32/797	273/18866	1.86208e-07	0.000226475	0.000207377	ATAD5/AURKA/AURKB/BRCA1/BRD4/CCNA2/CCNB2/CDC25A/CDC25B/CDC7/CDK5RAP2/CDK5RAP3/CENPJ/CEP152/CEP72/CEP76/CEP78/CHEK1/CLSPN/FHL1/FOXM1/ODF2/PAXIP1/PLK1/PRKACA/PRKAR2B/PSMA5/PSME1/PSME2/RAB11A/RBX1/USP47	32
BP	GO:0007098	centrosome cycle	20/797	125/18866	2.81155e-07	0.000273564	0.000250494	ARHGEF10/AURKA/BRCA1/BRCA2/CDK5RAP2/CENPJ/CEP152/CEP72/CEP76/CETN1/CHEK1/CHMP1B/CHMP4B/CHORDC1/FES/ODF2/PARD6G/PKHD1/PLK1/XRCC2	20
BP	GO:0010389	regulation of G2/M transition of mitotic cell cycle	26/797	200/18866	3.53456e-07	0.000286594	0.000262426	AURKA/AURKB/BRCA1/BRD4/CDC25A/CDC25B/CDC7/CDK5RAP2/CDK5RAP3/CENPJ/CEP152/CEP72/CEP76/CEP78/CLSPN/FHL1/ODF2/PLK1/PRKACA/PRKAR2B/PSMA5/PSME1/PSME2/RAB11A/RBX1/USP47	26
BP	GO:0031023	microtubule organizing center organization	20/797	136/18866	1.12446e-06	0.000728417	0.00066699	ARHGEF10/AURKA/BRCA1/BRCA2/CDK5RAP2/CENPJ/CEP152/CEP72/CEP76/CETN1/CHEK1/CHMP1B/CHMP4B/CHORDC1/FES/ODF2/PARD6G/PKHD1/PLK1/XRCC2	20
BP	GO:0000086	G2/M transition of mitotic cell cycle	29/797	254/18866	1.19781e-06	0.000728417	0.00066699	AURKA/AURKB/BRCA1/BRD4/CCNA2/CCNB2/CDC25A/CDC25B/CDC7/CDK5RAP2/CDK5RAP3/CENPJ/CEP152/CEP72/CEP76/CEP78/CLSPN/FHL1/FOXM1/ODF2/PLK1/PRKACA/PRKAR2B/PSMA5/PSME1/PSME2/RAB11A/RBX1/USP47	29
BP	GO:0051298	centrosome duplication	13/797	68/18866	4.51447e-06	0.00244032	0.00223453	ARHGEF10/BRCA1/BRCA2/CDK5RAP2/CENPJ/CEP152/CEP72/CEP76/CETN1/CHMP1B/CHMP4B/CHORDC1/PKHD1	13
BP	GO:0000280	nuclear division	38/797	428/18866	1.38386e-05	0.00673246	0.00616471	ANKRD31/ANLN/ARHGEF10/AURKA/AURKB/BRCA2/BRIP1/BUB1/BUB1B/C11orf80/CCNA1/CCNB2/CDC25B/CDC27/CDCA5/CDK5RAP2/CDT1/CENPE/CHEK1/CHMP1B/CHMP4B/CHMP7/CKS2/FBXO43/NUSAP1/PHF13/PLK1/PPP1R9B/PRC1/PSMC3IP/RAB11A/RAD51/SMC1A/SMC2/SMC5/SMPD3/USP44/ZNF711	38
BP	GO:0000070	mitotic sister chromatid segregation	20/797	161/18866	1.5457e-05	0.0068362	0.00625971	AURKB/BUB1/BUB1B/CDC27/CDCA5/CDK5RAP2/CDT1/CENPE/CHMP1B/CHMP4B/CHMP7/NUSAP1/PHF13/PLK1/PRC1/RAB11A/SMC1A/SMC2/SMC5/USP44	20
BP	GO:0007088	regulation of mitotic nuclear division	20/797	163/18866	1.85683e-05	0.00752791	0.00689309	ANLN/AURKA/AURKB/BUB1/BUB1B/CDC27/CDCA5/CDK5RAP2/CDT1/CENPE/CHEK1/CHMP1B/CHMP4B/FBXO43/NUSAP1/PLK1/PPP1R9B/SMC5/SMPD3/USP44	20
BP	GO:1990778	protein localization to cell periphery	32/797	340/18866	2.087e-05	0.00781021	0.00715158	ACTB/AGR2/ANK1/ANXA2/ARFRP1/ARL13A/CACNG4/FAM126A/GNAI1/GOLPH3/GOLPH3L/GRIN2C/GRIPAP1/NUMB/PACSIN1/PKP2/PLK1/PPIL2/PPP1R9B/PRKCE/PRKCZ/PRNP/RAB11A/RAB12/RAB15/RAB3C/RHOQ/SLC9A3R1/SMURF1/SNAP25/VAMP3/WNK3	32
BP	GO:0010948	negative regulation of cell cycle process	33/797	359/18866	2.51794e-05	0.00874986	0.00801198	AURKA/AURKB/BRCA1/BTN2A2/BUB1/BUB1B/CASP2/CBX3/CDC7/CDK5RAP2/CDK5RAP3/CDT1/CHEK1/CLSPN/CNOT3/EZH2/FBXO31/FBXO43/FBXO7/FHL1/HLA-G/PCBP4/PCGF6/PLK1/PSMA5/PSME1/PSME2/RAD51/RBBP8/RBX1/USP44/USP47/ZFP36L1	33
BP	GO:0043279	response to alkaloid	15/797	104/18866	3.06201e-05	0.00993112	0.00909364	ATG7/CACNG4/CASP7/CASQ2/CCNA2/FOSB/HNMT/OPRM1/OXTR/PPP1R9B/PRKCE/RAD51/SLC8A1/SMPD1/UQCRC1	15
BP	GO:0140014	mitotic nuclear division	28/797	286/18866	3.34771e-05	0.0100987	0.00924708	ANLN/ARHGEF10/AURKA/AURKB/BUB1/BUB1B/CCNB2/CDC27/CDCA5/CDK5RAP2/CDT1/CENPE/CHEK1/CHMP1B/CHMP4B/CHMP7/FBXO43/NUSAP1/PHF13/PLK1/PPP1R9B/PRC1/RAB11A/SMC1A/SMC2/SMC5/SMPD3/USP44	28
BP	GO:0033260	nuclear DNA replication	11/797	60/18866	3.67855e-05	0.0100987	0.00924708	ATAD5/BRCA2/CDC7/CDT1/GINS1/POLA2/POLD1/POLD2/RAD51/RFC4/UPF1	11
BP	GO:1902850	microtubule cytoskeleton organization involved in mitosis	18/797	144/18866	3.73641e-05	0.0100987	0.00924708	ARHGEF10/AURKA/AURKB/CDK5RAP2/CENPA/CENPE/CHMP1B/CHMP4B/FSD1/GJA1/GNAI1/NUSAP1/PAX6/PLK1/PRC1/RAB11A/RAE1/SMC1A	18
BP	GO:0070317	negative regulation of G0 to G1 transition	9/797	41/18866	4.24635e-05	0.0108729	0.00995598	BRCA1/CBX3/CDC7/CHEK1/EZH2/HLA-G/PCGF6/RAD51/RBBP8	9
BP	GO:0051783	regulation of nuclear division	21/797	188/18866	4.79663e-05	0.0116678	0.0106839	ANLN/AURKA/AURKB/BUB1/BUB1B/CDC27/CDCA5/CDK5RAP2/CDT1/CENPE/CHEK1/CHMP1B/CHMP4B/FBXO43/NUSAP1/PLK1/PPP1R9B/SMC5/SMPD3/USP44/ZNF711	21
BP	GO:0048285	organelle fission	39/797	476/18866	6.42989e-05	0.0141531	0.0129596	ANKRD31/ANLN/AP3B1/ARHGEF10/AURKA/AURKB/BRCA2/BRIP1/BUB1/BUB1B/C11orf80/CCNA1/CCNB2/CDC25B/CDC27/CDCA5/CDK5RAP2/CDT1/CENPE/CHEK1/CHMP1B/CHMP4B/CHMP7/CKS2/FBXO43/NUSAP1/PHF13/PLK1/PPP1R9B/PRC1/PSMC3IP/RAB11A/RAD51/SMC1A/SMC2/SMC5/SMPD3/USP44/ZNF711	39
BP	GO:1901991	negative regulation of mitotic cell cycle phase transition	25/797	251/18866	6.57335e-05	0.0141531	0.0129596	AURKA/AURKB/BRCA1/BTN2A2/BUB1/BUB1B/CASP2/CDK5RAP2/CDK5RAP3/CDT1/CLSPN/CNOT3/EZH2/FBXO31/FBXO7/FHL1/PCBP4/PLK1/PSMA5/PSME1/PSME2/RBX1/USP44/USP47/ZFP36L1	25
BP	GO:0034199	activation of protein kinase A activity	6/797	18/18866	6.69107e-05	0.0141531	0.0129596	ADCY3/PRKACA/PRKACB/PRKAR2A/PRKAR2B/PRRC1	6
BP	GO:0044786	cell cycle DNA replication	11/797	65/18866	7.92877e-05	0.0150428	0.0137743	ATAD5/BRCA2/CDC7/CDT1/GINS1/POLA2/POLD1/POLD2/RAD51/RFC4/UPF1	11
BP	GO:0006554	lysine catabolic process	5/797	12/18866	8.21172e-05	0.0150428	0.0137743	AADAT/AASS/GCDH/PIPOX/SLC25A21	5
BP	GO:1901988	negative regulation of cell cycle phase transition	26/797	270/18866	8.31859e-05	0.0150428	0.0137743	AURKA/AURKB/BRCA1/BTN2A2/BUB1/BUB1B/CASP2/CDK5RAP2/CDK5RAP3/CDT1/CHEK1/CLSPN/CNOT3/EZH2/FBXO31/FBXO7/FHL1/PCBP4/PLK1/PSMA5/PSME1/PSME2/RBX1/USP44/USP47/ZFP36L1	26
BP	GO:0071312	cellular response to alkaloid	8/797	35/18866	8.34852e-05	0.0150428	0.0137743	ATG7/CASP7/CASQ2/CCNA2/OPRM1/PPP1R9B/RAD51/SLC8A1	8
BP	GO:0009259	ribonucleotide metabolic process	35/797	416/18866	8.94679e-05	0.0154885	0.0141823	AADAT/AASS/ABCD1/ACOT1/ACSM3/ADCY3/ADSL/AK1/ALDOC/AMPD2/BAAT/CASK/FOXK1/GCDH/GCK/GMPS/GTPBP1/HMGCL/HSD17B4/NUP153/NUP188/NUP205/PANK1/PDE10A/PDE2A/PDE7B/PDE8A/PDHX/PDP2/PFKL/PIPOX/PPARA/RAE1/RFK/RHOQ	35
BP	GO:0070316	regulation of G0 to G1 transition	9/797	45/18866	9.23259e-05	0.0154885	0.0141823	BRCA1/CBX3/CDC7/CHEK1/EZH2/HLA-G/PCGF6/RAD51/RBBP8	9
BP	GO:0009150	purine ribonucleotide metabolic process	34/797	401/18866	9.66668e-05	0.0156583	0.0143378	AADAT/AASS/ABCD1/ACOT1/ACSM3/ADCY3/ADSL/AK1/ALDOC/AMPD2/BAAT/CASK/FOXK1/GCDH/GCK/GMPS/GTPBP1/HMGCL/HSD17B4/NUP153/NUP188/NUP205/PANK1/PDE10A/PDE2A/PDE7B/PDE8A/PDHX/PDP2/PFKL/PIPOX/PPARA/RAE1/RHOQ	34
BP	GO:0006260	DNA replication	26/797	273/18866	9.97751e-05	0.0156583	0.0143378	ATAD5/ATG7/BRCA1/BRCA2/BRIP1/CCNA2/CDC7/CDT1/CHAF1A/CHEK1/CLSPN/EXO1/GINS1/POLA2/POLD1/POLD2/POLG/RAD51/RAD9A/RBBP8/RBMS1/RFC4/RNASEH2A/UPF1/USP37/ZBTB38	26
BP	GO:0045023	G0 to G1 transition	9/797	46/18866	0.000110527	0.0168036	0.0153866	BRCA1/CBX3/CDC7/CHEK1/EZH2/HLA-G/PCGF6/RAD51/RBBP8	9
BP	GO:0045930	negative regulation of mitotic cell cycle	30/797	341/18866	0.000128115	0.0184304	0.0168761	AURKA/AURKB/BRCA1/BTN2A2/BUB1/BUB1B/CASP2/CDK5RAP2/CDK5RAP3/CDKN1C/CDT1/CHEK1/CLSPN/CNOT3/EZH2/FBXO31/FBXO7/FHL1/PCBP4/PLK1/PSMA5/PSME1/PSME2/RAD9A/RBX1/SLC9A3R1/USP44/USP47/XPC/ZFP36L1	30
BP	GO:0006553	lysine metabolic process	5/797	13/18866	0.000128804	0.0184304	0.0168761	AADAT/AASS/GCDH/PIPOX/SLC25A21	5
BP	GO:1901605	alpha-amino acid metabolic process	21/797	202/18866	0.000135306	0.0184909	0.0169316	AADAT/AASS/ACAD8/AFMID/AGXT/AMT/ASNS/ATCAY/BAAT/GAD2/GCDH/GFPT1/GLUD2/GMPS/HMGCL/HNMT/PHGDH/PIPOX/SLC25A21/SLC7A11/SMS	21
BP	GO:0006163	purine nucleotide metabolic process	36/797	442/18866	0.000136829	0.0184909	0.0169316	AADAT/AASS/ABCD1/ACOT1/ACSM3/ADCY3/ADSL/AK1/ALDOC/AMPD2/BAAT/CASK/FHIT/FOXK1/GCDH/GCK/GMPS/GTPBP1/HMGCL/HSD17B4/NUDT15/NUP153/NUP188/NUP205/PANK1/PDE10A/PDE2A/PDE7B/PDE8A/PDHX/PDP2/PFKL/PIPOX/PPARA/RAE1/RHOQ	36
BP	GO:0019693	ribose phosphate metabolic process	35/797	427/18866	0.000149204	0.0195423	0.0178943	AADAT/AASS/ABCD1/ACOT1/ACSM3/ADCY3/ADSL/AK1/ALDOC/AMPD2/BAAT/CASK/FOXK1/GCDH/GCK/GMPS/GTPBP1/HMGCL/HSD17B4/NUP153/NUP188/NUP205/PANK1/PDE10A/PDE2A/PDE7B/PDE8A/PDHX/PDP2/PFKL/PIPOX/PPARA/RAE1/RFK/RHOQ	35
BP	GO:0009952	anterior/posterior pattern specification	22/797	219/18866	0.000156128	0.0195423	0.0178943	ACVR2B/ATP6AP2/AURKA/CELSR2/CER1/FOXA2/HIPK2/HOXA10/HOXA11/HOXA2/HOXA3/HOXA7/HOXA9/HOXD3/PAX6/PCSK5/PCSK6/PLXNA2/RARG/SMAD2/XRCC2/ZBTB16	22
BP	GO:0072659	protein localization to plasma membrane	26/797	281/18866	0.000159378	0.0195423	0.0178943	ACTB/AGR2/ANK1/ANXA2/ARFRP1/FAM126A/GOLPH3/GOLPH3L/GRIPAP1/NUMB/PACSIN1/PKP2/PPIL2/PPP1R9B/PRKCE/PRKCZ/PRNP/RAB11A/RAB12/RAB15/RAB3C/RHOQ/SLC9A3R1/SMURF1/VAMP3/WNK3	26
BP	GO:0046605	regulation of centrosome cycle	10/797	59/18866	0.00016424	0.0195423	0.0178943	AURKA/BRCA1/CDK5RAP2/CENPJ/CEP76/CHEK1/CHMP1B/CHMP4B/CHORDC1/PKHD1	10
BP	GO:0016054	organic acid catabolic process	26/797	282/18866	0.00016871	0.0195423	0.0178943	AADAT/AASS/ABCD1/ABHD2/ACAA2/ACAD8/ACADVL/AFMID/AGXT/AMT/GAD2/GCDH/GLUD2/HMGCL/HNMT/HSD17B4/NUDT19/PCYOX1L/PIPOX/PON1/PPARA/PPARD/RENBP/SLC25A17/SLC25A21/SLC27A2	26
BP	GO:0046395	carboxylic acid catabolic process	26/797	282/18866	0.00016871	0.0195423	0.0178943	AADAT/AASS/ABCD1/ABHD2/ACAA2/ACAD8/ACADVL/AFMID/AGXT/AMT/GAD2/GCDH/GLUD2/HMGCL/HNMT/HSD17B4/NUDT19/PCYOX1L/PIPOX/PON1/PPARA/PPARD/RENBP/SLC25A17/SLC25A21/SLC27A2	26
BP	GO:0044282	small molecule catabolic process	36/797	452/18866	0.000211979	0.0239832	0.0219607	AADAT/AASS/ABCD1/ABHD2/ACAA2/ACAD8/ACADVL/AFMID/AGXT/AKR1C3/ALDH1B1/ALDOC/AMT/FOXK1/FUT4/GAD2/GCDH/GCK/GLUD2/GSK3A/HMGCL/HNMT/HSD17B4/NUDT15/NUDT19/PCYOX1L/PFKL/PIPOX/PON1/PPARA/PPARD/RBKS/RENBP/SLC25A17/SLC25A21/SLC27A2	36
BP	GO:0000819	sister chromatid segregation	20/797	196/18866	0.000248477	0.0270669	0.0247844	AURKB/BUB1/BUB1B/CDC27/CDCA5/CDK5RAP2/CDT1/CENPE/CHMP1B/CHMP4B/CHMP7/NUSAP1/PHF13/PLK1/PRC1/RAB11A/SMC1A/SMC2/SMC5/USP44	20
BP	GO:0006790	sulfur compound metabolic process	31/797	371/18866	0.000250362	0.0270669	0.0247844	AADAT/AASS/ABCD1/ACOT1/ACSM3/AGXT/B4GALT2/B4GALT4/B4GALT6/BAAT/CHAC1/CHPF/CHST12/CHST5/CHST6/CIAPIN1/GCDH/GSTA1/GSTO1/GSTP1/HLCS/HMGCL/HSD17B4/PCYOX1L/PDHX/PDP2/PHGDH/PIPOX/SLC7A11/SMS/XYLT2	31
BP	GO:0003014	renal system process	15/797	125/18866	0.000256159	0.0270916	0.024807	ADCY3/AKR1B1/AKR1C3/GJA1/OR51E2/PCSK5/PKN1/PRKACA/PRKACB/PRKAR2A/PRKAR2B/PTPRO/RAB11A/SLC9A3R1/XPNPEP3	15
BP	GO:0006520	cellular amino acid metabolic process	29/797	340/18866	0.000278543	0.0288321	0.0264007	AADAT/AASS/ACAD8/AFMID/AGXT/AMT/ASNS/ATCAY/BAAT/GAD2/GCDH/GFPT1/GLUD2/GMPS/HMGCL/HNMT/OAZ1/OAZ3/PCYOX1L/PHGDH/PIPOX/PPA1/PSMA5/PSME1/PSME2/RARS2/SLC25A21/SLC7A11/SMS	29
BP	GO:0051503	adenine nucleotide transport	7/797	32/18866	0.000311916	0.031614	0.028948	ABCD1/GJA1/SLC25A17/SLC25A18/SLC25A21/SLC25A24/SLC25A40	7
BP	GO:0043949	regulation of cAMP-mediated signaling	9/797	53/18866	0.000341437	0.0338998	0.031041	APLP1/GNAI1/GSK3A/OPRM1/OR51E2/PDE10A/PDE2A/PRKAR2A/PRKAR2B	9
BP	GO:0009314	response to radiation	35/797	447/18866	0.000354946	0.0342868	0.0313954	ASNS/AURKB/B4GALT2/BACE1/BRCA1/BRCA2/CAT/CBL/CDC25A/CHEK1/FOS/GRK7/OPRM1/PAXIP1/PBK/PDE1B/PDE6A/PIAS1/PITPNM1/POLD1/POLG/RAD51/RAD51AP1/RAD9A/RGS9BP/RNF8/SLC1A2/SLC4A10/SLC7A11/SMC1A/USP47/XPC/XRCC2/XRCC6/ZBTB1	35
BP	GO:0000079	regulation of cyclin-dependent protein serine/threonine kinase activity	13/797	102/18866	0.000359749	0.0342868	0.0313954	ACTB/CCNA1/CCNA2/CCNB2/CDC25A/CDK5R1/CDK5RAP1/CDK5RAP3/CDKN1C/CKS1B/CKS2/FBXO7/PLK1	13
BP	GO:0000910	cytokinesis	18/797	172/18866	0.000366477	0.0342868	0.0313954	ANLN/ANXA11/AURKA/AURKB/BRCA2/CDC25B/CENPA/CEP55/CHMP1B/CHMP4B/CHMP7/CKAP2/FSD1/NUSAP1/PLK1/PRC1/PRKCE/RAB11A	18
BP	GO:0009743	response to carbohydrate	22/797	233/18866	0.000375116	0.0343796	0.0314804	ACVR2B/ATG7/CAT/CDT1/FOXA2/GCK/GJA1/GSTP1/PFKL/PHPT1/POLG/PPARD/PRKACA/PRKCE/PTPRN/PTPRN2/RAB11B/RAB11FIP5/SLC8A1/SMAD2/SMARCA4/ZFP36L1	22
BP	GO:0015868	purine ribonucleotide transport	7/797	33/18866	0.000381603	0.0343796	0.0314804	ABCD1/GJA1/SLC25A17/SLC25A18/SLC25A21/SLC25A24/SLC25A40	7
BP	GO:0000075	cell cycle checkpoint	21/797	219/18866	0.000411007	0.0353298	0.0323504	AURKA/AURKB/BRCA1/BRIP1/BUB1/BUB1B/CASP2/CDK5RAP2/CDK5RAP3/CDT1/CHEK1/CLSPN/CNOT3/FBXO31/PCBP4/PLK1/PRPF19/RAD9A/USP44/WDR76/XPC	21
BP	GO:0016579	protein deubiquitination	25/797	283/18866	0.000426932	0.0353298	0.0323504	ACTB/ASXL2/ATXN3L/BRCA1/CCNA1/CCNA2/CDC25A/CLSPN/FOXK1/HCFC1/PSMA5/PSME1/PSME2/RCE1/SMAD1/SMAD2/SMAD7/SMURF2/USP14/USP3/USP37/USP38/USP42/USP44/USP47	25
BP	GO:1901606	alpha-amino acid catabolic process	13/797	104/18866	0.00043555	0.0353298	0.0323504	AADAT/AASS/ACAD8/AFMID/AGXT/AMT/GAD2/GCDH/GLUD2/HMGCL/HNMT/PIPOX/SLC25A21	13
BP	GO:0010824	regulation of centrosome duplication	8/797	44/18866	0.000449322	0.0353298	0.0323504	BRCA1/CDK5RAP2/CENPJ/CEP76/CHMP1B/CHMP4B/CHORDC1/PKHD1	8
BP	GO:0007094	mitotic spindle assembly checkpoint	7/797	34/18866	0.000463204	0.0353298	0.0323504	AURKB/BUB1/BUB1B/CDK5RAP2/CDT1/PLK1/USP44	7
BP	GO:0015865	purine nucleotide transport	7/797	34/18866	0.000463204	0.0353298	0.0323504	ABCD1/GJA1/SLC25A17/SLC25A18/SLC25A21/SLC25A24/SLC25A40	7
BP	GO:0031577	spindle checkpoint	7/797	34/18866	0.000463204	0.0353298	0.0323504	AURKB/BUB1/BUB1B/CDK5RAP2/CDT1/PLK1/USP44	7
BP	GO:0071173	spindle assembly checkpoint	7/797	34/18866	0.000463204	0.0353298	0.0323504	AURKB/BUB1/BUB1B/CDK5RAP2/CDT1/PLK1/USP44	7
BP	GO:0071174	mitotic spindle checkpoint	7/797	34/18866	0.000463204	0.0353298	0.0323504	AURKB/BUB1/BUB1B/CDK5RAP2/CDT1/PLK1/USP44	7
BP	GO:0007059	chromosome segregation	28/797	334/18866	0.00046477	0.0353298	0.0323504	ANKRD31/AURKB/BRCA1/BRIP1/BUB1/BUB1B/CDC27/CDCA2/CDCA5/CDK5RAP2/CDT1/CENPE/CHMP1B/CHMP4B/CHMP7/GEM/NUSAP1/OIP5/PHF13/PLK1/PRC1/RAB11A/RIOK3/SMC1A/SMC2/SMC5/SMC6/USP44	28
BP	GO:0072521	purine-containing compound metabolic process	36/797	472/18866	0.000481083	0.0360072	0.0329707	AADAT/AASS/ABCD1/ACOT1/ACSM3/ADCY3/ADSL/AK1/ALDOC/AMPD2/BAAT/CASK/FHIT/FOXK1/GCDH/GCK/GMPS/GTPBP1/HMGCL/HSD17B4/NUDT15/NUP153/NUP188/NUP205/PANK1/PDE10A/PDE2A/PDE7B/PDE8A/PDHX/PDP2/PFKL/PIPOX/PPARA/RAE1/RHOQ	36
BP	GO:0051321	meiotic cell cycle	23/797	254/18866	0.000505796	0.0368222	0.033717	ANKRD31/AURKA/BRCA2/BRIP1/BUB1/BUB1B/C11orf80/CCNA1/CDC25A/CDC25B/CKS2/EXO1/FBXO43/PIWIL1/PLK1/PRKACB/PSMC3IP/RAD51/RBBP8/SMC1A/SMC2/XRCC2/ZNF711	23
BP	GO:0034284	response to monosaccharide	20/797	207/18866	0.00050711	0.0368222	0.033717	ACVR2B/ATG7/CAT/FOXA2/GCK/GJA1/GSTP1/PFKL/PHPT1/POLG/PPARD/PRKACA/PRKCE/PTPRN/PTPRN2/RAB11B/RAB11FIP5/SLC8A1/SMAD2/SMARCA4	20
BP	GO:0030071	regulation of mitotic metaphase/anaphase transition	9/797	56/18866	0.000521395	0.0369799	0.0338614	AURKB/BUB1/BUB1B/CDC27/CDK5RAP2/CDT1/CENPE/PLK1/USP44	9
BP	GO:1904029	regulation of cyclin-dependent protein kinase activity	13/797	106/18866	0.000524484	0.0369799	0.0338614	ACTB/CCNA1/CCNA2/CCNB2/CDC25A/CDK5R1/CDK5RAP1/CDK5RAP3/CDKN1C/CKS1B/CKS2/FBXO7/PLK1	13
BP	GO:0015748	organophosphate ester transport	15/797	135/18866	0.000588864	0.0404482	0.0370372	ABCD1/APOA1/ATP9B/G6PC3/GJA1/PCTP/PITPNM1/SLC25A17/SLC25A18/SLC25A21/SLC25A24/SLC25A40/XKR6/XKR7/XKR9	15
BP	GO:1901264	carbohydrate derivative transport	12/797	94/18866	0.000590302	0.0404482	0.0370372	ABCD1/AGR2/G6PC3/GJA1/PRKCE/SLC25A17/SLC25A18/SLC25A21/SLC25A24/SLC25A40/SLC29A4/SLC35D3	12
BP	GO:1905475	regulation of protein localization to membrane	19/797	195/18866	0.000625009	0.0418734	0.0383423	ACTB/AGR2/CASP8/CDK5R1/GRIPAP1/NUMB/PDCD5/PMAIP1/PPP1R9B/PPP3R1/PRKCE/PRKCZ/PRNP/RAB11A/RHOQ/SLC7A11/WNK3/YWHAB/ZMYND8	19
BP	GO:1902750	negative regulation of cell cycle G2/M phase transition	13/797	108/18866	0.000628317	0.0418734	0.0383423	AURKA/AURKB/BRCA1/CDK5RAP3/CHEK1/CLSPN/FHL1/PLK1/PSMA5/PSME1/PSME2/RBX1/USP47	13
BP	GO:0045841	negative regulation of mitotic metaphase/anaphase transition	7/797	36/18866	0.000667897	0.0429522	0.03933	AURKB/BUB1/BUB1B/CDK5RAP2/CDT1/PLK1/USP44	7
BP	GO:0007093	mitotic cell cycle checkpoint	17/797	166/18866	0.000676549	0.0429522	0.03933	AURKA/AURKB/BRCA1/BUB1/BUB1B/CASP2/CDK5RAP2/CDK5RAP3/CDT1/CLSPN/CNOT3/FBXO31/PCBP4/PLK1/RAD9A/USP44/XPC	17
BP	GO:0007091	metaphase/anaphase transition of mitotic cell cycle	9/797	58/18866	0.000679819	0.0429522	0.03933	AURKB/BUB1/BUB1B/CDC27/CDK5RAP2/CDT1/CENPE/PLK1/USP44	9
BP	GO:1902099	regulation of metaphase/anaphase transition of cell cycle	9/797	58/18866	0.000679819	0.0429522	0.03933	AURKB/BUB1/BUB1B/CDC27/CDK5RAP2/CDT1/CENPE/PLK1/USP44	9
BP	GO:0007080	mitotic metaphase plate congression	8/797	47/18866	0.00071305	0.0444742	0.0407237	AURKB/CDCA5/CDT1/CENPE/CHMP1B/CHMP4B/CHMP7/RAB11A	8
BP	GO:0009063	cellular amino acid catabolic process	14/797	124/18866	0.000755685	0.0460498	0.0421665	AADAT/AASS/ACAD8/AFMID/AGXT/AMT/GAD2/GCDH/GLUD2/HMGCL/HNMT/PCYOX1L/PIPOX/SLC25A21	14
BP	GO:0045787	positive regulation of cell cycle	31/797	396/18866	0.000757243	0.0460498	0.0421665	ANKRD31/ASNS/ATAD5/AURKA/AURKB/BRCA1/BRCA2/BRD4/CASP2/CDC25A/CDC25B/CDC27/CDC7/CDCA5/CDK5R1/CDT1/CENPJ/CHEK1/CKS1B/CKS2/CNOT3/EZH2/HCFC1/NUSAP1/PCBP4/PRKACA/PRKCE/RAB11A/SMC5/SMPD3/ZNF711	31
BP	GO:0003091	renal water homeostasis	7/797	37/18866	0.000794087	0.0460686	0.0421836	ADCY3/AKR1B1/PRKACA/PRKACB/PRKAR2A/PRKAR2B/RAB11A	7
BP	GO:0007099	centriole replication	7/797	37/18866	0.000794087	0.0460686	0.0421836	BRCA1/CDK5RAP2/CENPJ/CEP152/CEP72/CEP76/CETN1	7
BP	GO:1902100	negative regulation of metaphase/anaphase transition of cell cycle	7/797	37/18866	0.000794087	0.0460686	0.0421836	AURKB/BUB1/BUB1B/CDK5RAP2/CDT1/PLK1/USP44	7
BP	GO:0033045	regulation of sister chromatid segregation	11/797	84/18866	0.000795428	0.0460686	0.0421836	AURKB/BUB1/BUB1B/CDC27/CDCA5/CDK5RAP2/CDT1/CENPE/PLK1/SMC5/USP44	11
BP	GO:0051348	negative regulation of transferase activity	25/797	296/18866	0.000822886	0.0470981	0.0431264	CBL/CDK5RAP1/CDK5RAP3/CDKN1C/CHORDC1/FBXO7/FOXA2/GSK3A/GSTP1/HIPK3/PHPT1/PKIB/PKN1/PLK1/PRDX3/PRKAR2A/PRKAR2B/PTPN2/PTPRO/RASIP1/SLC8A1/SMAD7/SMPD1/USP44/ZNF675	25
BP	GO:0000281	mitotic cytokinesis	10/797	72/18866	0.000855859	0.0478566	0.0438209	ANLN/CENPA/CEP55/CHMP1B/CHMP4B/CHMP7/CKAP2/NUSAP1/PLK1/PRC1	10
BP	GO:0033047	regulation of mitotic sister chromatid segregation	10/797	72/18866	0.000855859	0.0478566	0.0438209	AURKB/BUB1/BUB1B/CDC27/CDK5RAP2/CDT1/CENPE/PLK1/SMC5/USP44	10
BP	GO:0044784	metaphase/anaphase transition of cell cycle	9/797	60/18866	0.000875486	0.0478566	0.0438209	AURKB/BUB1/BUB1B/CDC27/CDK5RAP2/CDT1/CENPE/PLK1/USP44	9
BP	GO:0051784	negative regulation of nuclear division	9/797	60/18866	0.000875486	0.0478566	0.0438209	AURKB/BUB1/BUB1B/CDK5RAP2/CDT1/CHEK1/FBXO43/PLK1/USP44	9
CC	GO:0000794	condensed nuclear chromosome	15/825	103/19559	2.68348e-05	0.00838106	0.00727668	AURKA/AURKB/BRCA1/BRCA2/BRD4/BUB1/BUB1B/CENPA/CENPO/CHEK1/PELI1/PLK1/RAD51/RAD9A/SMC1A	15
CC	GO:0000780	condensed nuclear chromosome, centromeric region	8/825	32/19559	4.13264e-05	0.00838106	0.00727668	AURKA/AURKB/BUB1/BUB1B/CENPA/CENPO/PELI1/PLK1	8
CC	GO:0000778	condensed nuclear chromosome kinetochore	6/825	17/19559	4.58817e-05	0.00838106	0.00727668	BUB1/BUB1B/CENPA/CENPO/PELI1/PLK1	6
CC	GO:0000793	condensed chromosome	23/825	222/19559	6.84566e-05	0.00937855	0.00814273	AURKA/AURKB/BAZ1B/BRCA1/BRCA2/BRD4/BUB1/BUB1B/CBX3/CDT1/CENPA/CENPE/CENPO/CHEK1/PELI1/PLK1/RAD51/RAD9A/SMARCA5/SMC1A/SMC2/SMC5/SMC6	23
CC	GO:0030496	midbody	20/825	182/19559	8.90001e-05	0.00975441	0.00846906	ANKRD54/ANLN/ANXA11/ANXA2/AURKA/AURKB/CENPE/CEP55/CHMP1B/CHMP4B/EXOC4/GEM/GNAI1/PITPNM1/PKN1/PLK1/PRC1/RALA/RNF8/USP3	20
CC	GO:0043596	nuclear replication fork	8/825	41/19559	0.000268276	0.0222149	0.0192876	BAZ1B/POLA2/POLD1/POLD2/PRPF19/PURB/SMARCA5/ZMIZ2	8
CC	GO:0019005	SCF ubiquitin ligase complex	10/825	63/19559	0.000283766	0.0222149	0.0192876	CKS1B/CKS2/FBXL18/FBXO27/FBXO31/FBXO32/FBXO7/FBXW4/RBX1/USP47	10
CC	GO:0031985	Golgi cisterna	14/825	117/19559	0.000413325	0.0268089	0.0232763	B4GALNT3/B4GALT2/B4GALT4/B4GALT6/CHPF/FUT4/GALNT3/GCNT1/GOLPH3/GOLPH3L/HLA-A/PITPNM1/SMPD3/YIPF6	14
CC	GO:0098687	chromosomal region	29/825	350/19559	0.000440292	0.0268089	0.0232763	AURKA/AURKB/BAZ1B/BRCA2/BUB1/BUB1B/CBX3/CDCA5/CDT1/CENPA/CENPE/CENPO/CHEK1/EZH2/HAT1/HELLS/OIP5/PELI1/PKHD1/PLK1/POLD1/RAD51/RNF8/SMC1A/SMC5/SMC6/SMCHD1/UPF1/XRCC6	29
CC	GO:0072686	mitotic spindle	15/825	133/19559	0.000495421	0.0268104	0.0232776	AURKA/AURKB/CDC7/CDK5RAP2/CENPE/CEP170/CKAP2L/GEM/HDAC3/NUSAP1/PKHD1/PRC1/RAE1/SMC1A/YEATS2	15
CC	GO:0005952	cAMP-dependent protein kinase complex	4/825	10/19559	0.000538166	0.0268104	0.0232776	PRKACA/PRKACB/PRKAR2A/PRKAR2B	4
CC	GO:0005657	replication fork	10/825	71/19559	0.000757179	0.0345778	0.0300215	BAZ1B/POLA2/POLD1/POLD2/PRPF19/PURB/RFC4/SMARCA5/XRCC2/ZMIZ2	10
CC	GO:0098791	Golgi apparatus subcompartment	29/825	368/19559	0.000977652	0.0412118	0.0357813	ARFRP1/ATP9B/B4GALNT3/B4GALT2/B4GALT4/B4GALT6/BACE1/CBY1/CHAC1/CHPF/CHST5/CHST6/FUT4/GALNT3/GCNT1/GOLPH3/GOLPH3L/HLA-A/PCSK5/PICK1/PITPNM1/RAB11A/RAB32/RASIP1/SMPD3/SMPD4/SNAP25/VAMP3/YIPF6	29
CC	GO:0000151	ubiquitin ligase complex	24/825	287/19559	0.00116717	0.0456863	0.0396661	AMFR/ANKIB1/ARMC8/BRAP/BRCA1/BUB1B/CBX2/CDC27/CKS1B/CKS2/FBXL18/FBXO27/FBXO31/FBXO32/FBXO7/FBXW4/FEM1C/PCGF6/RBX1/RNF8/SMURF2/USP47/WDR26/ZSWIM4	24
MF	GO:0030552	cAMP binding	7/797	23/18352	3.77756e-05	0.02294	0.0203406	CNGA4/PDE10A/PDE2A/POPDC2/PRKAR2A/PRKAR2B/RAPGEF4	7
MF	GO:0031489	myosin V binding	6/797	17/18352	5.39764e-05	0.02294	0.0203406	FUS/RAB11A/RAB11B/RAB39B/RAB3C/RAB6B	6
MF	GO:0008081	phosphoric diester hydrolase activity	13/797	89/18352	0.000117755	0.026126	0.0231656	CHRM1/PDE10A/PDE1B/PDE2A/PDE6A/PDE7B/PDE8A/PLCG1/PLCXD2/SMPD1/SMPD3/SMPD4/SMPDL3A	13
MF	GO:0034450	ubiquitin-ubiquitin ligase activity	5/797	13/18352	0.000146694	0.026126	0.0231656	AMFR/PELI1/PPIL2/PRPF19/RBX1	5
MF	GO:0030551	cyclic nucleotide binding	8/797	37/18352	0.000153683	0.026126	0.0231656	CNGA4/PDE10A/PDE2A/POPDC2/PRKAR2A/PRKAR2B/RAPGEF4/SLC19A1	8
MF	GO:0097153	cysteine-type endopeptidase activity involved in apoptotic process	5/797	15/18352	0.000318316	0.037041	0.0328438	CASP14/CASP2/CASP7/CASP8/CFLAR	5
MF	GO:0004114	3',5'-cyclic-nucleotide phosphodiesterase activity	6/797	23/18352	0.000352095	0.037041	0.0328438	PDE10A/PDE1B/PDE2A/PDE6A/PDE7B/PDE8A	6
MF	GO:0008509	anion transmembrane transporter activity	30/797	357/18352	0.000448324	0.037041	0.0328438	ABCD1/AKR1C4/GABRB1/GABRR2/GJA1/GLRA3/SLC13A1/SLC18A1/SLC19A1/SLC1A2/SLC23A2/SLC24A2/SLC24A4/SLC25A17/SLC25A18/SLC25A21/SLC25A24/SLC25A40/SLC26A5/SLC27A2/SLC2A10/SLC2A14/SLC35D3/SLC4A10/SLC7A11/SLC7A13/SLC9A2/SLC9A3R1/SLCO1C1/SLCO4A1	30
MF	GO:0003924	GTPase activity	28/797	326/18352	0.000485988	0.037041	0.0328438	ARFRP1/GEM/GNAI1/GNAZ/GNG2/GNG3/GTPBP1/GTPBP3/RAB11A/RAB11B/RAB12/RAB15/RAB32/RAB39B/RAB3C/RAB5B/RAB6B/RALA/REM2/RGS10/RGS17/RGS21/RHEB/RHEBL1/RHOBTB2/RHOQ/RHOV/RIT2	28
MF	GO:0008514	organic anion transmembrane transporter activity	22/797	233/18352	0.000542656	0.037041	0.0328438	ABCD1/AKR1C4/GJA1/SLC19A1/SLC1A2/SLC23A2/SLC25A17/SLC25A18/SLC25A21/SLC25A24/SLC25A40/SLC26A5/SLC27A2/SLC2A10/SLC2A14/SLC35D3/SLC4A10/SLC7A11/SLC7A13/SLC9A3R1/SLCO1C1/SLCO4A1	22
MF	GO:0004112	cyclic-nucleotide phosphodiesterase activity	6/797	25/18352	0.000573514	0.037041	0.0328438	PDE10A/PDE1B/PDE2A/PDE6A/PDE7B/PDE8A	6
MF	GO:0019001	guanyl nucleotide binding	32/797	397/18352	0.000605142	0.037041	0.0328438	ANXA6/ARFRP1/ARL11/ARL13A/ARL15/CNGA4/GEM/GLUD2/GNAI1/GNAZ/GTPBP1/GTPBP3/PDE10A/PDE2A/RAB11A/RAB11B/RAB12/RAB15/RAB32/RAB39B/RAB3C/RAB5B/RAB6B/RALA/REM2/RHEB/RHEBL1/RHOBTB2/RHOQ/RHOV/RIT2/SLC19A1	32
MF	GO:0032561	guanyl ribonucleotide binding	32/797	397/18352	0.000605142	0.037041	0.0328438	ANXA6/ARFRP1/ARL11/ARL13A/ARL15/CNGA4/GEM/GLUD2/GNAI1/GNAZ/GTPBP1/GTPBP3/PDE10A/PDE2A/RAB11A/RAB11B/RAB12/RAB15/RAB32/RAB39B/RAB3C/RAB5B/RAB6B/RALA/REM2/RHEB/RHEBL1/RHOBTB2/RHOQ/RHOV/RIT2/SLC19A1	32
MF	GO:0035173	histone kinase activity	5/797	17/18352	0.000610087	0.037041	0.0328438	AURKA/AURKB/BAZ1B/CHEK1/PKN1	5
MF	GO:0004674	protein serine/threonine kinase activity	34/797	435/18352	0.000715542	0.0405474	0.0359528	ACVR2B/ADCK1/ALPK1/ANKK1/AURKA/AURKB/BRD4/BUB1/BUB1B/CASK/CDC7/CDKL4/CHEK1/GRK7/GSK3A/HIPK2/HIPK3/PAK6/PASK/PBK/PHKG1/PHKG2/PIM1/PKN1/PLK1/PRKACA/PRKACB/PRKCE/PRKCZ/RIOK1/RIOK3/SLK/WNK2/WNK3	34
MF	GO:0055102	lipase inhibitor activity	5/797	18/18352	0.000814736	0.0432829	0.0383784	ANGPTL3/ANXA2/ANXA2P2/APOA1/SNCB	5
MF	GO:0022853	active ion transmembrane transporter activity	21/797	229/18352	0.00104521	0.0498356	0.0441886	ABCD1/ATP13A1/ATP2A3/ATP6V0A2/ATP6V0E1/SLC13A1/SLC18A1/SLC19A1/SLC1A2/SLC20A1/SLC23A2/SLC24A2/SLC24A4/SLC26A5/SLC2A10/SLC4A10/SLC7A11/SLC8A1/SLC9A2/SLCO1C1/SLCO4A1	21
MF	GO:0008234	cysteine-type peptidase activity	15/797	139/18352	0.00105534	0.0498356	0.0441886	ATG4D/CAPNS1/CAPNS2/CASP14/CASP2/CASP7/CASP8/CFLAR/GGH/RCE1/USP14/USP37/USP38/USP42/USP47	15
