# Supplementary material for: Analysis of Chromosome 3P Genes Associated With Clinical Staging of Small Cell Lung Cancer and Prediction of Targeted Drugs
Source: Research Square preprint supplement (doi:10.21203/rs.3.rs-1050186/v1), 2021-11-16
Supplement: Supplementary file 6 [file 670b851ae10162618d966920.xlsx]

## Sheet: Sheet1
DN						UP
CLIC5						CDC6
ANKRD29						HELLS
CLDN18						EZH2
FBLN5						RFC4
ANXA3						BRIP1
SLIT3						FIGNL1
FGD5						CCNB2
GPX3						RACGAP1
PAPSS2						CHEK1
SHROOM4						ASPM
AGER						CENPI
PEBP4						AGPAT5
GPRC5A						PBK
ADH1B						CENPF
GPR116						PRC1
FCN3						BUB1
CD93						SNHG1
FIGF						PPAT
ACVRL1						EXO1
FOLR1						ZWINT
AOC3						CENPK
CDH5						CDC20
GIMAP8						CEP78
PDZD2						ATAD2
PTPRB						CDCA8
VEPH1						BUB1B
GPR133						PFN2
CALCRL						NUSAP1
RBPMS						CENPL
AQP1						C3orf14
PGC						BRCA1
HEG1						CCNA2
CD55						PTTG1
SLC39A8						PRPF39
FAM65A						CCDC34
AHNAK						WDHD1
SLC6A4						CBFA2T2
ALPL						CKAP2
C1orf116						RFWD3
ADH1A						RMI1
AKAP13						GDAP1
RBMS3						UNG
CD302						C11orf80
CLEC1A						WDR76
ADAMTS1						FANCA
ATP10A						ADAM22
C4BPA						FAM111B
CAT						CHAF1B
ABI3BP						GGH
C19orf59						ARHGAP11A
ATP13A4						GINS4
PCDH12						PLK4
AK1						CCDC14
GPR126						ZNF3
CLEC14A						POLQ
PROS1						ANLN
ALDH3B1						HIST1H2BC
AQP3						HIST1H2AL
CD44						GTSE1
ALDH2						AP3B2
CAST						BUB3
SLC22A3						CBX5
WIF1						GNG4
CD97						RBBP4
RBMS2						GMPS
CA2						FANCB
PLLP						PAFAH1B3
CD34						XPO5
ABCA8						CDKN3
ARHGAP6						C19orf48
QKI						CDC7
PDLIM2						HMGB2
FYCO1						CDCA2
PLA2G4F						PAICS
NTN4						RAD51AP1
GALNT5						CDC25C
FILIP1						HIST1H2BD
SLC16A5						FZD3
PALMD						FEN1
ALOX15B						PAXIP1
GYPC						ADD2
RNASE1						HLTF
FGFR4						CKAP5
ABLIM3						C17orf75
VSIG2						POLE2
PCDH1						PLK1
GPM6A						USP1
SH2D4A						CCDC99
RHOBTB2						PARP1
SLCO2A1						PSPH
CLEC3B						GMNN
PRKCZ						RNASEH2A
VGLL3						PRKDC
CFD						CCT3
WFS1						ARL6IP1
ARRB1						NUP43
VIPR1						ZNF669
PARVB						GINS1
PTRF						PPM1E
ADRB2						ANKRD32
AQP4						RAD54L
ACADL						ZNF260
PPP1R15A						UPF3B
ADCY4						ZNF670
SLC11A1						HIST1H2BL
GIMAP6						PCNA
WWC2						HIST1H2AK
VWF						C15orf42
SMAD6						CCT2
SH2D3C						SLC16A1
ABCA3						ZWILCH
WWTR1						ZNF551
VIM						OXCT1
SLC34A2						SKP2
SH3D19						FBXO5
GNG11						PIGX
CCDC69						C15orf23
OLR1						HIST1H3I
PRKCH						PARP2
GJA5						FANCD2
CD36						RFC3
SLC19A3						NUP155
FXYD5						HIST1H3B
RASGRF1						AURKA
CAPN3						ZNF749
CNN2						HIST1H2BJ
RIPK3						HDAC2
UNC13D						FOXM1
PTGIR						FBXO45
ADCY9						FKBP3
ANGPT1						XRCC2
PTPRE						ACBD7
CISH						PRR11
HHIP						CKAP2L
PRELP						ZNF326
FCN1						HIST1H3A
PGM5						FANCM
ADAMTS8						NUCKS1
PRKCQ						ZNF607
ALOX5AP						POLA2
HPGD						POLE
RAB11FIP1						RFC2
C10orf54						HOOK1
RILP						CHRNB2
AGTR1						ZNF544
C1orf162						BARD1
FABP4						EXOSC2
GAS7						C5orf34
ALS2CL						UTP11L
ZFP36						ZNF320
GALNTL4						FBL
SH3RF2						CENPN
FLRT3						CASC5
PRKCD						APOO
ANXA1						GPR137C
FMO2						GPR19
PARVA						FANCG
RAMP3						CDCA5
ANXA11						CBX3
PRKCE						HIST1H2BN
RAB27B						RIMBP2
RASL12						NUP54
GATA6						PCSK2
PVRL2						CCNE2
PDE4A						ZNF780B
PODXL						CASP8AP2
RAMP2						WNK3
OLFML1						HIST1H2AB
ADCY7						CENPM
ZFP106						GNAO1
ZFPM2						YEATS4
CGN						ZNF610
PPARG						PPIL1
PXN						HMGB3
CEBPD						CEP250
GKN2						CHAF1A
SLC31A2						PHYHIPL
ADAMTSL4						CDKN2C
RASSF2						CCT5
FRMD4B						CDCA4
CLIC3						ZDHHC13
OVCH2						UNC13A
CD59						ASNS
C7						GRM8
VSIG4						ZNF713
CNN1						CDCA3
CGNL1						CLSPN
PRICKLE2						ZNF766
SIDT2						CENPA
FGR						SMC4
CCDC68						SNAP25
PKNOX2						GATS
AQP9						RIMS2
BTNL9						CACNA1A
AKAP2						C20orf72
C5AR1						GPSM2
FHOD1						POT1
CDC42EP1						SHMT2
RIN2						ZNF643
FBP1						GINS3
FBLN1						HCN3
ZYX						OIP5
PDGFB						RAB3IP
RIN3						AURKB
UNC5C						FRMD5
ACTG2						ZNF557
SMAD7						CCNF
A2M						NUDT21
SLC9A3R2						ACTR6
PTGS2						OCIAD2
RARA						WHSC1
GUCY1A3						HIST1H2AG
CCDC48						HIST1H1C
AXL						CHN2
PMP22						PGBD1
PER1						ASF1B
UTRN						RAD54B
CFLAR						ACYP1
ZBTB4						CHD1L
AMICA1						NUP205
PTGER2						CDC5L
SH3RF1						SMS
AGRN						ZNF93
FHL5						PCSK1
SHC3						HIST1H4A
RFTN1						HACE1
ATP11A						SNRPA
ARHGAP27						ATP8A2
ALOX5						WDR67
CDR1						ZNF85
ACSL5						USP37
APLP2						PSIP1
HLF						ZNF543
ARHGDIB						SNAP91
ADPRH						GRIK3
CD37						GAS2L3
OSMR						PSAT1
GNAI2						ZNF695
YAP1						FANCL
GIMAP1						WASF1
PTPRM						RNF182
C10orf47						HIST1H3C
ACE						C14orf2
CAV2						CEP76
C14orf43						ONECUT2
CACNA2D2						FBXO43
PPAP2B						ZNF611
PTGER4						PROX1
FHL1						GRP
ARHGAP23						PRTFDC1
FOXF1						WDR53
PLCE1						RBL1
UPK3B						CDCA7
WAS						ZNF525
C8orf4						POLB
CD52						ZNF221
OSTF1						RBBP8
GIMAP5						SLC1A4
RAB31						SNHG6
C1orf198						C12orf32
CD9						ASCL1
ARHGEF15						ZNF124
FAM20A						AMPH
CELSR1						CNIH2
FOSL2						RHBDL3
SH3BP5						CDKN2A
CAPN2						CKS1B
ZNF366						ZC3H8
VEGFC						ZMAT4
PLCD1						HN1
RBMS1						ZNF397
PLXDC2						RAD21
B3GNT7						SLC38A1
FGD2						ZNF711
FLT4						HMGN2
GMFG						RDM1
PPM1F						SLC25A40
PEAR1						RAB9B
ASAH1						GTPBP8
PAG1						CADPS
ARHGEF3						C8orf44
PRICKLE1						FAM40B
GSN						FAM64A
PDGFA						HIST1H4L
P2RY1						CHRNA5
C1orf38						AGBL4
ANPEP						ZFP90
BCL9L						ZNF681
GADD45B						EXOSC5
ZFP36L2						POLR3K
SNED1						FKBP4
AHR						ZNF367
FXYD1						GPT2
GNA15						CEP192
RNF149						PCDHB9
CCND3						CIT
HBEGF						H2AFV
FLNA						GPR180
ARHGAP29						ARL6IP6
ATP2C2						PCBP3
CIITA						CCNE1
SLPI						SLC7A14
ATP2B4						CLGN
GDF10						BTBD11
CD300C						ZNF229
GUCY1A2						APITD1
FLI1						SLCO5A1
UNC13B						RIBC2
RAB20						HIST1H3H
RASGRP2						RCC2
PDZK1IP1						FMN2
C19orf33						SMC1A
OSR1						HN1L
RASSF8						PIAS2
SIRPB2						APLP1
HBB						ZNF680
AMOTL2						ZNF706
HCK						CDC25A
PRSS8						FSD1
RHOG						CASP6
RCSD1						B4GALT6
ATOH8						ZNF718
PLCB2						ZNF639
HLA-DMA						WDR62
RAI2						PGBD5
AKNA						ACTL6B
SLC2A10						RNF138
SIGLEC9						ACADM
ACSL1						HIST1H1B
PLD1						AACS
C10orf128						EYA2
FLII						SLC5A3
PTGDS						CLSTN2
GPR157						GEMIN6
RHOC						HES6
SHANK3						ASRGL1
PTGIS						ZYG11A
AVPI1						SH3GL2
C2						ZNF480
BCL6B						HIST1H2BH
CDK6						RAB3B
C11orf9						C18orf54
ZFP36L1						HIST2H2BF
FEZ1						RAB39B
ADARB1						SLC4A8
VAMP8						ZNF510
VCL						C2orf15
CCBE1						ATCAY
PTPN21						PCLO
PMM1						ATP1A3
C10orf11						EYA1
GPD1L						ZIC2
PLA1A						FBXO16
WWC3						CAMK1D
ATXN7						GRM2
C10orf10						RAB3C
HEYL						HOXD10
SIRPB1						C1orf51
C5orf4						SLC2A1
SHE						HIST1H2BG
PCDHGC3						CHGB
OASL						HIST1H3G
GGT1						GTF2A2
PHF15						HIST1H2AH
RECK						PKIB
NXF3						HIST1H2BF
SIAE						CHD7
ETS1						ZNF780A
HIPK3						SMPD3
CEBPB						ADAMTS18
SLCO2B1						ARNTL2
CFTR						ATRNL1
SLC15A2						HIST1H3D
ZBTB38						ZNF528
CCRL2						FADS1
PDXK						ZFP30
VASP						ADCY1
GLI3						RELN
GIMAP7						ZDHHC22
PRX						GPRC5B
ATXN1						CA8
SIPA1						CALB1
HPCAL1						RBP1
C3						B3GALT5
PRF1						FADS2
PTPLA						HIST1H2AE
FAM107A						PHGDH
CD82						ODZ3
RAC2						RGS17
ADRA1A						PEX5L
HCLS1						CAMK2B
CASKIN2						SMAD9
ARHGAP26						SNORA71A
GPR124						RASSF6
BRI3						PKP2
HCST						SIX1
ZBTB16						CBLN1
PRNP						GNG3
GABARAPL1						HIST1H3F
SLC43A2						CHRNA3
CAV1						FGF9
WNT2						HIST2H2BE
RHOF						ASXL3
F11						QPCT
AFAP1L1						ADCYAP1
RASIP1						PRUNE2
RBP4						PROM1
PDGFRB
ATHL1
FSTL3
P2RX1
ADRB1
RASSF5
GNA14
GNLY
HLA-DOA
VAMP5
FCER1G
ZHX2
USP53
CASP1
APOL3
ABCC3
WISP2
ADAMTS9
AKR1C3
CD4
SLIT2
APBB1IP
ACOXL
HMHA1
PODN
PFKFB3
ANKRD1
PIGR
RGS2
C1RL
GRAP2
PML
GBP4
PTAFR
AOX1
GANC
GATA2
CES1
RNF128
HSD17B6
PHACTR2
OLFML2A
CLDN5
FPR1
PARD3B
HECW2
RAB27A
PPP1R14A
GAB1
SLA
FAM46B
PLAC9
VASN
PLAT
ARID5A
PTGDR
REL
ARHGEF6
CMTM8
HDC
ABLIM1
C4orf19
WTIP
ABI3
PLA2G1B
CASP10
PRG4
RASL11A
CD74
PDPN
PDK4
CARD6
HEPH
BTK
ARHGEF17
CASP4
ALDH1A2
FAM78A
SLC44A2
RHBDF2
ACSS2
AEBP1
SLC40A1
AIM1
NUPR1
CHRDL1
GRASP
SLC25A37
C1QC
HLA-DPB1
PDE3A
PCSK5
ASPA
FURIN
VPS37B
HMOX1
FLT1
CLIP4
PHLDB2
PPM1M
ACP5
UPP1
PDGFRA
H6PD
HK3
CD151
FAS
PREX1
OR5P3
CH25H
FOSB
PDLIM1
CD300LF
C1QA
CDH13
C1QB
FCGR2A
HIF3A
PTPRG
HLA-DRB1
CITED2
GPC3
CLEC7A
PRODH
HSPA12B
CD58
CD53
CCL2
PSTPIP2
ARPC1B
PRKCDBP
FMO3
FZD4
CD83
PRAM1
APOC1
PLAUR
CLU
HLA-DQB1
GABRE
PARP4
BCAT1
CFI
ARHGAP24
CA4
CCL21
SLC2A3
SLC5A9
PLAGL1
GIPC1
HLA-DRA
REST
OSCAR
SIGLEC1
SMAD3
USP25
SLC1A1
CD163
GPC5
PLK3
HLA-DMB
BCL3
GAS6
CALCOCO2
CD300E
PDE4D
GCNT4
ALDH1A1
PTPN13
FAM129B
AIF1
GPD1
PLEKHF1
CCR1
CFH
CD69
VDR
ANXA2
SLC6A14
ARHGAP18
GIMAP4
OAS2
EVI2B
BAG3
C1R
FOLR2
CD81
SIRPA
ARHGEF1
ZC3H12A
F2RL3
PARP14
PDLIM5
PLXNA2
HLA-E
ANKRD44
CEACAM6
PIK3AP1
PDLIM3
GRN
HLA-DPA1
PPFIBP1
CD3E
AKR1C1
FTL
FILIP1L
PTPRC
FAM49A
ZEB2
GPRIN3
UNC93B1
HAVCR2
PLK2
C1S
FCGR3A
CAPG
PPIC
CD14
ARHGAP25
XAF1
PLAC8
GUCY1B3
GPX1
FGFR2
RHBDF1
VNN2
RARRES3
CMTM3
PRSS23
CAPN13
PLEK
ANGPTL1
ARRDC4
F13A1
FASN
CMKLR1
AOAH
FOS
RNF122
AASS
GM2A
ARHGAP15
RHOB
SLC38A5
RAB8B
RANBP3L
CCL5
BTG2
C4B
CAB39L
CLEC12A
ARSA
F8
POR
CD274
BTN3A3
FGL2
CCL18
HGF
CCDC17
ABCA6
APOL6
CLIC2
CD109
BCL6
ARID5B
GRAMD2
C3AR1
PIK3R1
SLC7A8
F3
CD86
SLFN5
GBP2
GRK5
ACTA2
PRKG1
SLC7A2
HAS2
FCGRT
PIP5K1B
B4GALT1
BST2
FYB
PLSCR4
ETS2
RAPGEF5
PVRL3
FGD4
AKAP12
CD2
HLA-C
FGF7
C20orf85
FKBP5
PLEKHG1
GBP1
GSTM5
CCND2
P2RX7
RND1
CCND1
RHOJ
ZDHHC11B
FAM101B
RARRES2
SLAMF8
HLA-DQB2
ATF3
AGBL1
CDH11
CECR1
WARS
GLRX
PLTP
PLS3
ADM
ABCC4
PAQR5
HLA-B
HIVEP2
PRDM1
FBN1
HLA-A
FMO5
GFPT2
CCL3
SLC4A4
P2RY8
RND3
PTPN14
FAT4
OLFML3
ARRDC2
G0S2
GPNMB
CLEC4E
CD3G
HMCN1
FXYD3
SLC5A8
CD38
CD84
CCDC80
ADAMTS4
CHIT1
AGR3
