# Supplementary material for: Analysis of Chromosome 3P Genes Associated With Clinical Staging of Small Cell Lung Cancer and Prediction of Targeted Drugs
Source: Research Square preprint supplement (doi:10.21203/rs.3.rs-1050186/v1), 2021-11-16
Supplement: Supplementary file 15 [file ecbd6bddf59e6f40dbc2a82d.xlsx]

## Sheet: GSE40275_sample
Acc	Desc	Title	Type	Platform	Organism	Source	rows	file	Data_col1	Data_col2	tissue	histology	age [y]	Sex	Stage	tumor grade	tnm	DataProcessing
GSM990169	CI0000006947 - CR559282 - RN00001060	V5307	RNA	GPL15974	Homo sapiens	normal lung	56283	GSM990169-tbl-1.txt	1,ID_REF,	2,VALUE,RMA normalized	normal lung	normal	62	Female	Not applicable	Not applicable	Not applicable	Raw (CEL) files were Robust Multichip Average-normalized using the affy package in R/Bioconductor.
GSM990170	CI0000006947 - CR559282 - RN00001060	V5308	RNA	GPL15974	Homo sapiens	normal lung	56283	GSM990170-tbl-1.txt	1,ID_REF,	2,VALUE,RMA normalized	normal lung	normal	62	Female	Not applicable	Not applicable	Not applicable	Raw (CEL) files were Robust Multichip Average-normalized using the affy package in R/Bioconductor.
GSM990171	CI0000006947 - CR559282 - RN00001060	V5309	RNA	GPL15974	Homo sapiens	normal lung	56283	GSM990171-tbl-1.txt	1,ID_REF,	2,VALUE,RMA normalized	normal lung	normal	62	Female	Not applicable	Not applicable	Not applicable	Raw (CEL) files were Robust Multichip Average-normalized using the affy package in R/Bioconductor.
GSM990172	CI0000000029 - CR560259 - RN00000E25	V5310	RNA	GPL15974	Homo sapiens	normal lung	56283	GSM990172-tbl-1.txt	1,ID_REF,	2,VALUE,RMA normalized	normal lung	normal	38	Female	Not applicable	Not applicable	Not applicable	Raw (CEL) files were Robust Multichip Average-normalized using the affy package in R/Bioconductor.
GSM990173	CI0000000029 - CR560259 - RN00000E25	V5311	RNA	GPL15974	Homo sapiens	normal lung	56283	GSM990173-tbl-1.txt	1,ID_REF,	2,VALUE,RMA normalized	normal lung	normal	38	Female	Not applicable	Not applicable	Not applicable	Raw (CEL) files were Robust Multichip Average-normalized using the affy package in R/Bioconductor.
GSM990174	CI0000000029 - CR560259 - RN00000E25	V5312	RNA	GPL15974	Homo sapiens	normal lung	56283	GSM990174-tbl-1.txt	1,ID_REF,	2,VALUE,RMA normalized	normal lung	normal	38	Female	Not applicable	Not applicable	Not applicable	Raw (CEL) files were Robust Multichip Average-normalized using the affy package in R/Bioconductor.
GSM990175	CU0000005265 - CR561643 - RN00000964	V5313	RNA	GPL15974	Homo sapiens	normal lung	56283	GSM990175-tbl-1.txt	1,ID_REF,	2,VALUE,RMA normalized	normal lung	normal	78	Male	Not applicable	Not applicable	Not applicable	Raw (CEL) files were Robust Multichip Average-normalized using the affy package in R/Bioconductor.
GSM990176	CU0000005265 - CR561643 - RN00000964	V5314	RNA	GPL15974	Homo sapiens	normal lung	56283	GSM990176-tbl-1.txt	1,ID_REF,	2,VALUE,RMA normalized	normal lung	normal	78	Male	Not applicable	Not applicable	Not applicable	Raw (CEL) files were Robust Multichip Average-normalized using the affy package in R/Bioconductor.
GSM990177	CU0000005265 - CR561643 - RN00000964	V5315	RNA	GPL15974	Homo sapiens	normal lung	56283	GSM990177-tbl-1.txt	1,ID_REF,	2,VALUE,RMA normalized	normal lung	normal	78	Male	Not applicable	Not applicable	Not applicable	Raw (CEL) files were Robust Multichip Average-normalized using the affy package in R/Bioconductor.
GSM990178	CU0000005967 - CR561388 - RN000017B3	V5316	RNA	GPL15974	Homo sapiens	normal lung	56283	GSM990178-tbl-1.txt	1,ID_REF,	2,VALUE,RMA normalized	normal lung	normal	80	Male	Not applicable	Not applicable	Not applicable	Raw (CEL) files were Robust Multichip Average-normalized using the affy package in R/Bioconductor.
GSM990179	CU0000005967 - CR561388 - RN000017B3	V5317	RNA	GPL15974	Homo sapiens	normal lung	56283	GSM990179-tbl-1.txt	1,ID_REF,	2,VALUE,RMA normalized	normal lung	normal	80	Male	Not applicable	Not applicable	Not applicable	Raw (CEL) files were Robust Multichip Average-normalized using the affy package in R/Bioconductor.
GSM990180	CU0000005967 - CR561388 - RN000017B3	V5318	RNA	GPL15974	Homo sapiens	normal lung	56283	GSM990180-tbl-1.txt	1,ID_REF,	2,VALUE,RMA normalized	normal lung	normal	80	Male	Not applicable	Not applicable	Not applicable	Raw (CEL) files were Robust Multichip Average-normalized using the affy package in R/Bioconductor.
GSM990181	CU0000005332 - CR561589 - RN0000095F	V5319	RNA	GPL15974	Homo sapiens	normal lung	56283	GSM990181-tbl-1.txt	1,ID_REF,	2,VALUE,RMA normalized	normal lung	normal	65	Male	Not applicable	Not applicable	Not applicable	Raw (CEL) files were Robust Multichip Average-normalized using the affy package in R/Bioconductor.
GSM990182	CU0000005332 - CR561589 - RN0000095F	V5320	RNA	GPL15974	Homo sapiens	normal lung	56283	GSM990182-tbl-1.txt	1,ID_REF,	2,VALUE,RMA normalized	normal lung	normal	65	Male	Not applicable	Not applicable	Not applicable	Raw (CEL) files were Robust Multichip Average-normalized using the affy package in R/Bioconductor.
GSM990183	CU0000005332 - CR561589 - RN0000095F	V5321	RNA	GPL15974	Homo sapiens	normal lung	56283	GSM990183-tbl-1.txt	1,ID_REF,	2,VALUE,RMA normalized	normal lung	normal	65	Male	Not applicable	Not applicable	Not applicable	Raw (CEL) files were Robust Multichip Average-normalized using the affy package in R/Bioconductor.
GSM990184	CI0000008641 - CR561107 - RN00001208	V5322	RNA	GPL15974	Homo sapiens	normal lung	56283	GSM990184-tbl-1.txt	1,ID_REF,	2,VALUE,RMA normalized	normal lung	normal	49	Female	Not applicable	Not applicable	Not applicable	Raw (CEL) files were Robust Multichip Average-normalized using the affy package in R/Bioconductor.
GSM990185	CI0000008641 - CR561107 - RN00001208	V5361	RNA	GPL15974	Homo sapiens	normal lung	56283	GSM990185-tbl-1.txt	1,ID_REF,	2,VALUE,RMA normalized	normal lung	normal	49	Female	Not applicable	Not applicable	Not applicable	Raw (CEL) files were Robust Multichip Average-normalized using the affy package in R/Bioconductor.
GSM990186	CI0000008641 - CR561107 - RN00001208	V5362	RNA	GPL15974	Homo sapiens	normal lung	56283	GSM990186-tbl-1.txt	1,ID_REF,	2,VALUE,RMA normalized	normal lung	normal	49	Female	Not applicable	Not applicable	Not applicable	Raw (CEL) files were Robust Multichip Average-normalized using the affy package in R/Bioconductor.
GSM990187	CU0000005278 - CR561576 - RN00000A9A	V5363	RNA	GPL15974	Homo sapiens	normal lung	56283	GSM990187-tbl-1.txt	1,ID_REF,	2,VALUE,RMA normalized	normal lung	normal	72	Female	Not applicable	Not applicable	Not applicable	Raw (CEL) files were Robust Multichip Average-normalized using the affy package in R/Bioconductor.
GSM990188	CU0000005278 - CR561576 - RN00000A9A	V5364	RNA	GPL15974	Homo sapiens	normal lung	56283	GSM990188-tbl-1.txt	1,ID_REF,	2,VALUE,RMA normalized	normal lung	normal	72	Female	Not applicable	Not applicable	Not applicable	Raw (CEL) files were Robust Multichip Average-normalized using the affy package in R/Bioconductor.
GSM990189	CU0000005278 - CR561576 - RN00000A9A	V5365	RNA	GPL15974	Homo sapiens	normal lung	56283	GSM990189-tbl-1.txt	1,ID_REF,	2,VALUE,RMA normalized	normal lung	normal	72	Female	Not applicable	Not applicable	Not applicable	Raw (CEL) files were Robust Multichip Average-normalized using the affy package in R/Bioconductor.
GSM990190	CI0000018461 - CR562424 - RN000023E4	V5366	RNA	GPL15974	Homo sapiens	normal lung	56283	GSM990190-tbl-1.txt	1,ID_REF,	2,VALUE,RMA normalized	normal lung	normal	66	Female	Not applicable	Not applicable	Not applicable	Raw (CEL) files were Robust Multichip Average-normalized using the affy package in R/Bioconductor.
GSM990191	CI0000018461 - CR562424 - RN000023E4	V5367	RNA	GPL15974	Homo sapiens	normal lung	56283	GSM990191-tbl-1.txt	1,ID_REF,	2,VALUE,RMA normalized	normal lung	normal	66	Female	Not applicable	Not applicable	Not applicable	Raw (CEL) files were Robust Multichip Average-normalized using the affy package in R/Bioconductor.
GSM990192	CI0000018461 - CR562424 - RN000023E4	V5368	RNA	GPL15974	Homo sapiens	normal lung	56283	GSM990192-tbl-1.txt	1,ID_REF,	2,VALUE,RMA normalized	normal lung	normal	66	Female	Not applicable	Not applicable	Not applicable	Raw (CEL) files were Robust Multichip Average-normalized using the affy package in R/Bioconductor.
GSM990193	CI0000013181 - CR560571 - RN00001A56	V5369	RNA	GPL15974	Homo sapiens	normal lung	56283	GSM990193-tbl-1.txt	1,ID_REF,	2,VALUE,RMA normalized	normal lung	normal	66	Male	Not applicable	Not applicable	Not applicable	Raw (CEL) files were Robust Multichip Average-normalized using the affy package in R/Bioconductor.
GSM990194	CI0000013181 - CR560571 - RN00001A56	V5370	RNA	GPL15974	Homo sapiens	normal lung	56283	GSM990194-tbl-1.txt	1,ID_REF,	2,VALUE,RMA normalized	normal lung	normal	66	Male	Not applicable	Not applicable	Not applicable	Raw (CEL) files were Robust Multichip Average-normalized using the affy package in R/Bioconductor.
GSM990195	CI0000013181 - CR560571 - RN00001A56	V5371	RNA	GPL15974	Homo sapiens	normal lung	56283	GSM990195-tbl-1.txt	1,ID_REF,	2,VALUE,RMA normalized	normal lung	normal	66	Male	Not applicable	Not applicable	Not applicable	Raw (CEL) files were Robust Multichip Average-normalized using the affy package in R/Bioconductor.
GSM990196	CI0000000104 - CR560046 - RN00000FC6	V5372	RNA	GPL15974	Homo sapiens	normal lung	56283	GSM990196-tbl-1.txt	1,ID_REF,	2,VALUE,RMA normalized	normal lung	normal	61	Female	Not applicable	Not applicable	Not applicable	Raw (CEL) files were Robust Multichip Average-normalized using the affy package in R/Bioconductor.
GSM990197	CI0000000104 - CR560046 - RN00000FC6	V5373	RNA	GPL15974	Homo sapiens	normal lung	56283	GSM990197-tbl-1.txt	1,ID_REF,	2,VALUE,RMA normalized	normal lung	normal	61	Female	Not applicable	Not applicable	Not applicable	Raw (CEL) files were Robust Multichip Average-normalized using the affy package in R/Bioconductor.
GSM990198	CI0000000104 - CR560046 - RN00000FC6	V5374	RNA	GPL15974	Homo sapiens	normal lung	56283	GSM990198-tbl-1.txt	1,ID_REF,	2,VALUE,RMA normalized	normal lung	normal	61	Female	Not applicable	Not applicable	Not applicable	Raw (CEL) files were Robust Multichip Average-normalized using the affy package in R/Bioconductor.
GSM990199	CI0000013164 - CR560573 - RN00001A55	V5375	RNA	GPL15974	Homo sapiens	normal lung	56283	GSM990199-tbl-1.txt	1,ID_REF,	2,VALUE,RMA normalized	normal lung	normal	64	Male	Not applicable	Not applicable	Not applicable	Raw (CEL) files were Robust Multichip Average-normalized using the affy package in R/Bioconductor.
GSM990200	CI0000013164 - CR560573 - RN00001A55	V5376	RNA	GPL15974	Homo sapiens	normal lung	56283	GSM990200-tbl-1.txt	1,ID_REF,	2,VALUE,RMA normalized	normal lung	normal	64	Male	Not applicable	Not applicable	Not applicable	Raw (CEL) files were Robust Multichip Average-normalized using the affy package in R/Bioconductor.
GSM990201	CI0000013164 - CR560573 - RN00001A55	V5377	RNA	GPL15974	Homo sapiens	normal lung	56283	GSM990201-tbl-1.txt	1,ID_REF,	2,VALUE,RMA normalized	normal lung	normal	64	Male	Not applicable	Not applicable	Not applicable	Raw (CEL) files were Robust Multichip Average-normalized using the affy package in R/Bioconductor.
GSM990202	CI0000007037 - CR560698 - RN00001061	V5378	RNA	GPL15974	Homo sapiens	normal lung	56283	GSM990202-tbl-1.txt	1,ID_REF,	2,VALUE,RMA normalized	normal lung	normal	65	Female	Not applicable	Not applicable	Not applicable	Raw (CEL) files were Robust Multichip Average-normalized using the affy package in R/Bioconductor.
GSM990203	CI0000007037 - CR560698 - RN00001061	V5379	RNA	GPL15974	Homo sapiens	normal lung	56283	GSM990203-tbl-1.txt	1,ID_REF,	2,VALUE,RMA normalized	normal lung	normal	65	Female	Not applicable	Not applicable	Not applicable	Raw (CEL) files were Robust Multichip Average-normalized using the affy package in R/Bioconductor.
GSM990204	CI0000007037 - CR560698 - RN00001061	V5380	RNA	GPL15974	Homo sapiens	normal lung	56283	GSM990204-tbl-1.txt	1,ID_REF,	2,VALUE,RMA normalized	normal lung	normal	65	Female	Not applicable	Not applicable	Not applicable	Raw (CEL) files were Robust Multichip Average-normalized using the affy package in R/Bioconductor.
GSM990205	CI0000009518-CR560068-RN00001A4E	V4070	RNA	GPL15974	Homo sapiens	Carcinoma of lung, small cell	56283	GSM990205-tbl-1.txt	1,ID_REF,	2,VALUE,RMA normalized	primary tumor	Small cell (oat, intermediate cell, combined oat)	54	Male	IIIA	Not Reported	pT2pN2pMX	Raw (CEL) files were Robust Multichip Average-normalized using the affy package in R/Bioconductor.
GSM990206	CI0000009518-CR560068-RN00001A4E	V4071	RNA	GPL15974	Homo sapiens	Carcinoma of lung, small cell	56283	GSM990206-tbl-1.txt	1,ID_REF,	2,VALUE,RMA normalized	primary tumor	Small cell (oat, intermediate cell, combined oat)	54	Male	IIIA	Not Reported	pT2pN2pMX	Raw (CEL) files were Robust Multichip Average-normalized using the affy package in R/Bioconductor.
GSM990207	CI0000009518-CR560068-RN00001A4E	V4072	RNA	GPL15974	Homo sapiens	Carcinoma of lung, small cell	56283	GSM990207-tbl-1.txt	1,ID_REF,	2,VALUE,RMA normalized	primary tumor	Small cell (oat, intermediate cell, combined oat)	54	Male	IIIA	Not Reported	pT2pN2pMX	Raw (CEL) files were Robust Multichip Average-normalized using the affy package in R/Bioconductor.
GSM990208	CI0000005593-CR559249-RN0000375F	V4073	RNA	GPL15974	Homo sapiens	normal lung	56283	GSM990208-tbl-1.txt	1,ID_REF,	2,VALUE,RMA normalized	normal lung	normal	76	Male	Not applicable	Not applicable	Not applicable	Raw (CEL) files were Robust Multichip Average-normalized using the affy package in R/Bioconductor.
GSM990209	CI0000005593-CR559249-RN0000375F	V4074	RNA	GPL15974	Homo sapiens	normal lung	56283	GSM990209-tbl-1.txt	1,ID_REF,	2,VALUE,RMA normalized	normal lung	normal	76	Male	Not applicable	Not applicable	Not applicable	Raw (CEL) files were Robust Multichip Average-normalized using the affy package in R/Bioconductor.
GSM990210	CI0000005593-CR559249-RN0000375F	V4075	RNA	GPL15974	Homo sapiens	normal lung	56283	GSM990210-tbl-1.txt	1,ID_REF,	2,VALUE,RMA normalized	normal lung	normal	76	Male	Not applicable	Not applicable	Not applicable	Raw (CEL) files were Robust Multichip Average-normalized using the affy package in R/Bioconductor.
GSM990211	CI0000005593-CR560848-RN00001EF7	V4076	RNA	GPL15974	Homo sapiens	Carcinoma of lung, small cell	56283	GSM990211-tbl-1.txt	1,ID_REF,	2,VALUE,RMA normalized	primary tumor	Small cell (oat, intermediate cell, combined oat)	76	Male	IIIB	Not Reported	pT4pN2pMX	Raw (CEL) files were Robust Multichip Average-normalized using the affy package in R/Bioconductor.
GSM990212	CI0000005593-CR560848-RN00001EF7	V4077	RNA	GPL15974	Homo sapiens	Carcinoma of lung, small cell	56283	GSM990212-tbl-1.txt	1,ID_REF,	2,VALUE,RMA normalized	primary tumor	Small cell (oat, intermediate cell, combined oat)	76	Male	IIIB	Not Reported	pT4pN2pMX	Raw (CEL) files were Robust Multichip Average-normalized using the affy package in R/Bioconductor.
GSM990213	CI0000005593-CR560848-RN00001EF7	V4078	RNA	GPL15974	Homo sapiens	Carcinoma of lung, small cell	56283	GSM990213-tbl-1.txt	1,ID_REF,	2,VALUE,RMA normalized	primary tumor	Small cell (oat, intermediate cell, combined oat)	76	Male	IIIB	Not Reported	pT4pN2pMX	Raw (CEL) files were Robust Multichip Average-normalized using the affy package in R/Bioconductor.
GSM990214	CI0000019503-CR562629-RN000038BE	V4079	RNA	GPL15974	Homo sapiens	Carcinoma of lung, small cell	56283	GSM990214-tbl-1.txt	1,ID_REF,	2,VALUE,RMA normalized	primary tumor	Adeno and small cell carcinoma	61	Male	IIIB	AJCC G3: Poorly differentiated	pT4pN0pMX	Raw (CEL) files were Robust Multichip Average-normalized using the affy package in R/Bioconductor.
GSM990215	CI0000019503-CR562629-RN000038BE	V4080	RNA	GPL15974	Homo sapiens	Carcinoma of lung, small cell	56283	GSM990215-tbl-1.txt	1,ID_REF,	2,VALUE,RMA normalized	primary tumor	Adeno and small cell carcinoma	61	Male	IIIB	AJCC G3: Poorly differentiated	pT4pN0pMX	Raw (CEL) files were Robust Multichip Average-normalized using the affy package in R/Bioconductor.
GSM990216	CI0000019503-CR562629-RN000038BE	V4081	RNA	GPL15974	Homo sapiens	Carcinoma of lung, small cell	56283	GSM990216-tbl-1.txt	1,ID_REF,	2,VALUE,RMA normalized	primary tumor	Adeno and small cell carcinoma	61	Male	IIIB	AJCC G3: Poorly differentiated	pT4pN0pMX	Raw (CEL) files were Robust Multichip Average-normalized using the affy package in R/Bioconductor.
GSM990217	CI0000021816-CR562578-RN0000346C	V4082	RNA	GPL15974	Homo sapiens	Carcinoma of lung, small cell	56283	GSM990217-tbl-1.txt	1,ID_REF,	2,VALUE,RMA normalized	primary tumor	Adenocarcinoma	68	Male	IIIA	Not Reported	pT1pN2pMX	Raw (CEL) files were Robust Multichip Average-normalized using the affy package in R/Bioconductor.
GSM990218	CI0000021816-CR562578-RN0000346C	V4084	RNA	GPL15974	Homo sapiens	Carcinoma of lung, small cell	56283	GSM990218-tbl-1.txt	1,ID_REF,	2,VALUE,RMA normalized	primary tumor	Adenocarcinoma	68	Male	IIIA	Not Reported	pT1pN2pMX	Raw (CEL) files were Robust Multichip Average-normalized using the affy package in R/Bioconductor.
GSM990219	CI7000000173-CR562270-RN00001ACA	V4085	RNA	GPL15974	Homo sapiens	Carcinoma of lung, small cell	56283	GSM990219-tbl-1.txt	1,ID_REF,	2,VALUE,RMA normalized	primary tumor	Small cell (oat, intermediate cell, combined oat)	74	Male	IA	Not Reported	pT1pN0pMX	Raw (CEL) files were Robust Multichip Average-normalized using the affy package in R/Bioconductor.
GSM990220	CI7000000173-CR562270-RN00001ACA	V4086	RNA	GPL15974	Homo sapiens	Carcinoma of lung, small cell	56283	GSM990220-tbl-1.txt	1,ID_REF,	2,VALUE,RMA normalized	primary tumor	Small cell (oat, intermediate cell, combined oat)	74	Male	IA	Not Reported	pT1pN0pMX	Raw (CEL) files were Robust Multichip Average-normalized using the affy package in R/Bioconductor.
GSM990221	CI7000000173-CR562270-RN00001ACA	V4087	RNA	GPL15974	Homo sapiens	Carcinoma of lung, small cell	56283	GSM990221-tbl-1.txt	1,ID_REF,	2,VALUE,RMA normalized	primary tumor	Small cell (oat, intermediate cell, combined oat)	74	Male	IA	Not Reported	pT1pN0pMX	Raw (CEL) files were Robust Multichip Average-normalized using the affy package in R/Bioconductor.
GSM990222	CU0000001180-CR562708-RN00001220	V4088	RNA	GPL15974	Homo sapiens	Carcinoma of lung, small cell	56283	GSM990222-tbl-1.txt	1,ID_REF,	2,VALUE,RMA normalized	primary tumor	Small cell (oat, intermediate cell, combined oat)	71	Male	IB	Not Reported	pT2pN0pMX	Raw (CEL) files were Robust Multichip Average-normalized using the affy package in R/Bioconductor.
GSM990223	CU0000001180-CR562708-RN00001220	V4089	RNA	GPL15974	Homo sapiens	Carcinoma of lung, small cell	56283	GSM990223-tbl-1.txt	1,ID_REF,	2,VALUE,RMA normalized	primary tumor	Small cell (oat, intermediate cell, combined oat)	71	Male	IB	Not Reported	pT2pN0pMX	Raw (CEL) files were Robust Multichip Average-normalized using the affy package in R/Bioconductor.
GSM990224	CU0000001180-CR562708-RN00001220	V4090	RNA	GPL15974	Homo sapiens	Carcinoma of lung, small cell	56283	GSM990224-tbl-1.txt	1,ID_REF,	2,VALUE,RMA normalized	primary tumor	Small cell (oat, intermediate cell, combined oat)	71	Male	IB	Not Reported	pT2pN0pMX	Raw (CEL) files were Robust Multichip Average-normalized using the affy package in R/Bioconductor.
GSM990225	CU0000014767-CR561968-RN00002FBB	V4091	RNA	GPL15974	Homo sapiens	Carcinoma of lung, small cell, lymph node metastatic	56283	GSM990225-tbl-1.txt	1,ID_REF,	2,VALUE,RMA normalized	metastasis (LN)	Carcinoma	63	Male	IIA	AJCC G3: Poorly differentiated	pT1pN1pMX	Raw (CEL) files were Robust Multichip Average-normalized using the affy package in R/Bioconductor.
GSM990226	CU0000014767-CR561968-RN00002FBB	V4092	RNA	GPL15974	Homo sapiens	Carcinoma of lung, small cell, lymph node metastatic	56283	GSM990226-tbl-1.txt	1,ID_REF,	2,VALUE,RMA normalized	metastasis (LN)	Carcinoma	63	Male	IIA	AJCC G3: Poorly differentiated	pT1pN1pMX	Raw (CEL) files were Robust Multichip Average-normalized using the affy package in R/Bioconductor.
GSM990227	CU0000014767-CR561968-RN00002FBB	V4093	RNA	GPL15974	Homo sapiens	Carcinoma of lung, small cell, lymph node metastatic	56283	GSM990227-tbl-1.txt	1,ID_REF,	2,VALUE,RMA normalized	metastasis (LN)	Carcinoma	63	Male	IIA	AJCC G3: Poorly differentiated	pT1pN1pMX	Raw (CEL) files were Robust Multichip Average-normalized using the affy package in R/Bioconductor.
GSM990228	CI0000013452-CR560495-RN00001AD0	V4094	RNA	GPL15974	Homo sapiens	normal lung	56283	GSM990228-tbl-1.txt	1,ID_REF,	2,VALUE,RMA normalized	normal lung	normal	70	Female	Not applicable	Not applicable	Not applicable	Raw (CEL) files were Robust Multichip Average-normalized using the affy package in R/Bioconductor.
GSM990229	CI0000013452-CR560495-RN00001AD0	V4095	RNA	GPL15974	Homo sapiens	normal lung	56283	GSM990229-tbl-1.txt	1,ID_REF,	2,VALUE,RMA normalized	normal lung	normal	70	Female	Not applicable	Not applicable	Not applicable	Raw (CEL) files were Robust Multichip Average-normalized using the affy package in R/Bioconductor.
GSM990230	CI0000013452-CR560495-RN00001AD0	V4096	RNA	GPL15974	Homo sapiens	normal lung	56283	GSM990230-tbl-1.txt	1,ID_REF,	2,VALUE,RMA normalized	normal lung	normal	70	Female	Not applicable	Not applicable	Not applicable	Raw (CEL) files were Robust Multichip Average-normalized using the affy package in R/Bioconductor.
GSM990231	CI0000013452-CR560494-RN00001EE8	V4097	RNA	GPL15974	Homo sapiens	Carcinoma of lung, small cell	56283	GSM990231-tbl-1.txt	1,ID_REF,	2,VALUE,RMA normalized	primary tumor	Small cell (oat, intermediate cell, combined oat)	70	Female	IB	Not Reported	pT2pN0pMX	Raw (CEL) files were Robust Multichip Average-normalized using the affy package in R/Bioconductor.
GSM990232	CI0000013452-CR560494-RN00001EE8	V4098	RNA	GPL15974	Homo sapiens	Carcinoma of lung, small cell	56283	GSM990232-tbl-1.txt	1,ID_REF,	2,VALUE,RMA normalized	primary tumor	Small cell (oat, intermediate cell, combined oat)	70	Female	IB	Not Reported	pT2pN0pMX	Raw (CEL) files were Robust Multichip Average-normalized using the affy package in R/Bioconductor.
GSM990233	CI0000013452-CR560494-RN00001EE8	V4099	RNA	GPL15974	Homo sapiens	Carcinoma of lung, small cell	56283	GSM990233-tbl-1.txt	1,ID_REF,	2,VALUE,RMA normalized	primary tumor	Small cell (oat, intermediate cell, combined oat)	70	Female	IB	Not Reported	pT2pN0pMX	Raw (CEL) files were Robust Multichip Average-normalized using the affy package in R/Bioconductor.
GSM990234	ORI-17nsclc-CI0000013181-CR560583	NSCLC_1_20111129	RNA	GPL15974	Homo sapiens	Adenocarcinoma of lung	56283	GSM990234-tbl-1.txt	1,ID_REF,	2,VALUE,RMA normalized	primary tumor	Adenocarcinoma of lung (acin,pap,bronchalv,solid w/mucus)	66	Male	IB	AJCC G3: Poorly differentiated	pT2pN0pMX	Raw (CEL) files were Robust Multichip Average-normalized using the affy package in R/Bioconductor.
GSM990235	ORI-27nsclc-CI0000009937-CR560096	NSCLC_2_20111129	RNA	GPL15974	Homo sapiens	Adenocarcinoma of lung	56283	GSM990235-tbl-1.txt	1,ID_REF,	2,VALUE,RMA normalized	primary tumor	Adenocarcinoma of lung (acin,pap,bronchalv,solid w/mucus)	48	Female	IB	AJCC G3: Poorly differentiated	pT2pN0pMX	Raw (CEL) files were Robust Multichip Average-normalized using the affy package in R/Bioconductor.
GSM990236	ORI-19nsclc-CI0000013164-CR560574	NSCLC_3_20111129	RNA	GPL15974	Homo sapiens	Adenocarcinoma of lung	56283	GSM990236-tbl-1.txt	1,ID_REF,	2,VALUE,RMA normalized	primary tumor	Adenocarcinoma of lung (acin,pap,bronchalv,solid w/mucus)	64	Male	IB	AJCC G3: Poorly differentiated	pT2pN0pMX	Raw (CEL) files were Robust Multichip Average-normalized using the affy package in R/Bioconductor.
GSM990237	ORI-28nsclc-CU0000006152-CR561441	NSCLC_4_20111129	RNA	GPL15974	Homo sapiens	Adenocarcinoma of lung	56283	GSM990237-tbl-1.txt	1,ID_REF,	2,VALUE,RMA normalized	primary tumor	Adenocarcinoma of lung (acin,pap,bronchalv,solid w/mucus)	72	Female	IIIA	AJCC G3: Poorly differentiated	pT1pN2pMX	Raw (CEL) files were Robust Multichip Average-normalized using the affy package in R/Bioconductor.
GSM990238	ORI-23nsclc-CI0000008195-CR561028	NSCLC_5_20111129	RNA	GPL15974	Homo sapiens	Carcinoma of lung, large cell	56283	GSM990238-tbl-1.txt	1,ID_REF,	2,VALUE,RMA normalized	primary tumor	Carcinoma of lung, large cell (giant, clear)	56	Female	IIIA	AJCC G3: Poorly differentiated	pT2pN2pMX	Raw (CEL) files were Robust Multichip Average-normalized using the affy package in R/Bioconductor.
GSM990239	ORI-14nsclc-CI0000008641-CR561109	NSCLC_6_20111129	RNA	GPL15974	Homo sapiens	Carcinoma of lung, neuroendocrine	56283	GSM990239-tbl-1.txt	1,ID_REF,	2,VALUE,RMA normalized	primary tumor	Carcinoma of lung, large cell, neuroendocrine	49	Female	IB	Not Reported	pT2pN0pMX	Raw (CEL) files were Robust Multichip Average-normalized using the affy package in R/Bioconductor.
GSM990240	ORI-22nsclc-CU0000005332-CR561590	NSCLC_7_20111129	RNA	GPL15974	Homo sapiens	Carcinoma of lung, non-small cell	56283	GSM990240-tbl-1.txt	1,ID_REF,	2,VALUE,RMA normalized	primary tumor	Carcinoma of lung, squamous cell (spindle cell)	65	Male	IIB	AJCC G3: Poorly differentiated	pT2pN1pMX	Raw (CEL) files were Robust Multichip Average-normalized using the affy package in R/Bioconductor.
GSM990241	ORI-18nsclc-CI0000000104-CR560051	NSCLC_13_20111129	RNA	GPL15974	Homo sapiens	Adenocarcinoma of lung	56283	GSM990241-tbl-1.txt	1,ID_REF,	2,VALUE,RMA normalized	primary tumor	Adenocarcinoma of lung (acin,pap,bronchalv,solid w/mucus)	61	Female	IA	AJCC G2: Moderately differentiated	pT1pN0pMX	Raw (CEL) files were Robust Multichip Average-normalized using the affy package in R/Bioconductor.
GSM990242	ORI-20nsclc-CI0000007037-CR560699	NSCLC_14_20111129	RNA	GPL15974	Homo sapiens	Adenocarcinoma of lung	56283	GSM990242-tbl-1.txt	1,ID_REF,	2,VALUE,RMA normalized	primary tumor	Adenocarcinoma of lung (acin,pap,bronchalv,solid w/mucus)	65	Female	IA	AJCC G2: Moderately differentiated	pT1pN0pMX	Raw (CEL) files were Robust Multichip Average-normalized using the affy package in R/Bioconductor.
GSM990243	ORI-29nsclc-CI0000005602-CR560830	NSCLC_15_20111129	RNA	GPL15974	Homo sapiens	Adenocarcinoma of lung	56283	GSM990243-tbl-1.txt	1,ID_REF,	2,VALUE,RMA normalized	primary tumor	Adenocarcinoma of lung (acin,pap,bronchalv,solid w/mucus)	74	Male	IB	AJCC G3: Poorly differentiated	pT2pNXpMX	Raw (CEL) files were Robust Multichip Average-normalized using the affy package in R/Bioconductor.
GSM990244	Ori-21-CU0000005115-CR561632	NSCLC_17_20111129	RNA	GPL15974	Homo sapiens	Adenocarcinoma of lung	56283	GSM990244-tbl-1.txt	1,ID_REF,	2,VALUE,RMA normalized	primary tumor	Adenocarcinoma of lung (acin,pap,bronchalv,solid w/mucus)	59	Female	IB	AJCC G3: Poorly differentiated	pT2pN0pMX	Raw (CEL) files were Robust Multichip Average-normalized using the affy package in R/Bioconductor.
GSM990245	ORI-24nsclc-CU0000005387-CR561735	NSCLC_18_20111129	RNA	GPL15974	Homo sapiens	Carcinoma of lung, large cell	56283	GSM990245-tbl-1.txt	1,ID_REF,	2,VALUE,RMA normalized	primary tumor	Carcinoma of lung, large cell (giant, clear)	79	Female	IIB	Not Reported	pT2pN1pMX	Raw (CEL) files were Robust Multichip Average-normalized using the affy package in R/Bioconductor.
GSM990246	CI0000021816-CR562578-RN0000346C	SCLC_4_20111129	RNA	GPL15974	Homo sapiens	Carcinoma of lung, small cell	56283	GSM990246-tbl-1.txt	1,ID_REF,	2,VALUE,RMA normalized	primary tumor	Adenocarcinoma	68	Male	IIIA	Not Reported	pT1pN2pMX	Raw (CEL) files were Robust Multichip Average-normalized using the affy package in R/Bioconductor.
GSM990247	CU0000014767-CR561968-RN00002FBB	SCLC_7_20111129	RNA	GPL15974	Homo sapiens	Carcinoma of lung, small cell, lymph node metastatic	56283	GSM990247-tbl-1.txt	1,ID_REF,	2,VALUE,RMA normalized	metastasis (LN)	Carcinoma	63	Male	IIA	AJCC G3: Poorly differentiated	pT1pN1pMX	Raw (CEL) files were Robust Multichip Average-normalized using the affy package in R/Bioconductor.
GSM990248	ORI-10nsclc-CI0000000029-CR560266	NSCLC_8_20111129	RNA	GPL15974	Homo sapiens	Carcinoma of lung, squamous cell	56283	GSM990248-tbl-1.txt	1,ID_REF,	2,VALUE,RMA normalized	primary tumor	Carcinoma of lung, squamous cell (spindle cell)	38	Female	IB	Not Reported	pT2pN0pMX	Raw (CEL) files were Robust Multichip Average-normalized using the affy package in R/Bioconductor.
GSM990249	ORI-25nsclc-CI0000007511-CR561170	NSCLC_9_20111129	RNA	GPL15974	Homo sapiens	Carcinoma of lung, squamous cell	56283	GSM990249-tbl-1.txt	1,ID_REF,	2,VALUE,RMA normalized	primary tumor	Carcinoma of lung, squamous cell (spindle cell)	59	Male	IB	AJCC G2: Moderately differentiated	pT2pN0pMX	Raw (CEL) files were Robust Multichip Average-normalized using the affy package in R/Bioconductor.
GSM990250	ORI-26nsclc-CU0000000135-CR562233	NSCLC_10_20111129	RNA	GPL15974	Homo sapiens	Carcinoma of lung, squamous cell	56283	GSM990250-tbl-1.txt	1,ID_REF,	2,VALUE,RMA normalized	primary tumor	Carcinoma of lung, squamous cell (spindle cell)	80	Male	IB	Not Reported	pT2pN0pMX	Raw (CEL) files were Robust Multichip Average-normalized using the affy package in R/Bioconductor.
GSM990251	ORI-11nsclc-CU0000005265-CR561641	NSCLC_11_20111129	RNA	GPL15974	Homo sapiens	Carcinoma of lung, squamous cell	56283	GSM990251-tbl-1.txt	1,ID_REF,	2,VALUE,RMA normalized	primary tumor	Carcinoma of lung, squamous cell (spindle cell)	78	Male	IIB	AJCC G2: Moderately differentiated	pT2pN1pMX	Raw (CEL) files were Robust Multichip Average-normalized using the affy package in R/Bioconductor.
GSM990252	CI0000005593-CR559249-RN0000375F	normal_13_20111129	RNA	GPL15974	Homo sapiens	normal lung	56283	GSM990252-tbl-1.txt	1,ID_REF,	2,VALUE,RMA normalized	normal lung	normal	76	Male	Not applicable	Not applicable	Not applicable	Raw (CEL) files were Robust Multichip Average-normalized using the affy package in R/Bioconductor.
