# Supplementary material for: Analysis of Chromosome 3P Genes Associated With Clinical Staging of Small Cell Lung Cancer and Prediction of Targeted Drugs
Source: Research Square preprint supplement (doi:10.21203/rs.3.rs-1050186/v1), 2021-11-16
Supplement: Supplementary file 21 [file 70cc64d5dbaa29816ed5824c.xlsx]

## Sheet: GSE60052_sample
Acc	Desc	Title	Type	Platform	Organism	Source	disease status	DataProcessing
GSM1464282		B08-3483NA	SRA	GPL11154	Homo sapiens	normal	healthy	Illumina,Sequenced reads were trimmed for adaptor sequence, and masked for low-complexity or low-quality sequence, then mapped to Human genome reference hg19 via Bowtie,Data were normalized using DESeq in R.,Genome_build: hg19,Supplementary_files_format_and_content: TSV file with normalized read counts for each sample.
GSM1464283		B08-3758NA	SRA	GPL11154	Homo sapiens	normal	healthy	Illumina,Sequenced reads were trimmed for adaptor sequence, and masked for low-complexity or low-quality sequence, then mapped to Human genome reference hg19 via Bowtie,Data were normalized using DESeq in R.,Genome_build: hg19,Supplementary_files_format_and_content: TSV file with normalized read counts for each sample.
GSM1464284		B08-4386NA	SRA	GPL11154	Homo sapiens	normal	healthy	Illumina,Sequenced reads were trimmed for adaptor sequence, and masked for low-complexity or low-quality sequence, then mapped to Human genome reference hg19 via Bowtie,Data were normalized using DESeq in R.,Genome_build: hg19,Supplementary_files_format_and_content: TSV file with normalized read counts for each sample.
GSM1464285		B08-4579NA	SRA	GPL11154	Homo sapiens	normal	healthy	Illumina,Sequenced reads were trimmed for adaptor sequence, and masked for low-complexity or low-quality sequence, then mapped to Human genome reference hg19 via Bowtie,Data were normalized using DESeq in R.,Genome_build: hg19,Supplementary_files_format_and_content: TSV file with normalized read counts for each sample.
GSM1464286		N08-4497A	SRA	GPL11154	Homo sapiens	normal	healthy	Illumina,Sequenced reads were trimmed for adaptor sequence, and masked for low-complexity or low-quality sequence, then mapped to Human genome reference hg19 via Bowtie,Data were normalized using DESeq in R.,Genome_build: hg19,Supplementary_files_format_and_content: TSV file with normalized read counts for each sample.
GSM1464287		N08-3503A	SRA	GPL11154	Homo sapiens	normal	healthy	Illumina,Sequenced reads were trimmed for adaptor sequence, and masked for low-complexity or low-quality sequence, then mapped to Human genome reference hg19 via Bowtie,Data were normalized using DESeq in R.,Genome_build: hg19,Supplementary_files_format_and_content: TSV file with normalized read counts for each sample.
GSM1464288		N08-3758A	SRA	GPL11154	Homo sapiens	normal	healthy	Illumina,Sequenced reads were trimmed for adaptor sequence, and masked for low-complexity or low-quality sequence, then mapped to Human genome reference hg19 via Bowtie,Data were normalized using DESeq in R.,Genome_build: hg19,Supplementary_files_format_and_content: TSV file with normalized read counts for each sample.
GSM1464289		11A	SRA	GPL11154	Homo sapiens	tumor	small cell lung cancer	Illumina,Sequenced reads were trimmed for adaptor sequence, and masked for low-complexity or low-quality sequence, then mapped to Human genome reference hg19 via Bowtie,Data were normalized using DESeq in R.,Genome_build: hg19,Supplementary_files_format_and_content: TSV file with normalized read counts for each sample.
GSM1464290		12A	SRA	GPL11154	Homo sapiens	tumor	small cell lung cancer	Illumina,Sequenced reads were trimmed for adaptor sequence, and masked for low-complexity or low-quality sequence, then mapped to Human genome reference hg19 via Bowtie,Data were normalized using DESeq in R.,Genome_build: hg19,Supplementary_files_format_and_content: TSV file with normalized read counts for each sample.
GSM1464291		13A	SRA	GPL11154	Homo sapiens	tumor	small cell lung cancer	Illumina,Sequenced reads were trimmed for adaptor sequence, and masked for low-complexity or low-quality sequence, then mapped to Human genome reference hg19 via Bowtie,Data were normalized using DESeq in R.,Genome_build: hg19,Supplementary_files_format_and_content: TSV file with normalized read counts for each sample.
GSM1464292		14A	SRA	GPL11154	Homo sapiens	tumor	small cell lung cancer	Illumina,Sequenced reads were trimmed for adaptor sequence, and masked for low-complexity or low-quality sequence, then mapped to Human genome reference hg19 via Bowtie,Data were normalized using DESeq in R.,Genome_build: hg19,Supplementary_files_format_and_content: TSV file with normalized read counts for each sample.
GSM1464293		15A	SRA	GPL11154	Homo sapiens	tumor	small cell lung cancer	Illumina,Sequenced reads were trimmed for adaptor sequence, and masked for low-complexity or low-quality sequence, then mapped to Human genome reference hg19 via Bowtie,Data were normalized using DESeq in R.,Genome_build: hg19,Supplementary_files_format_and_content: TSV file with normalized read counts for each sample.
GSM1464294		16A	SRA	GPL11154	Homo sapiens	tumor	small cell lung cancer	Illumina,Sequenced reads were trimmed for adaptor sequence, and masked for low-complexity or low-quality sequence, then mapped to Human genome reference hg19 via Bowtie,Data were normalized using DESeq in R.,Genome_build: hg19,Supplementary_files_format_and_content: TSV file with normalized read counts for each sample.
GSM1464295		17A	SRA	GPL11154	Homo sapiens	tumor	small cell lung cancer	Illumina,Sequenced reads were trimmed for adaptor sequence, and masked for low-complexity or low-quality sequence, then mapped to Human genome reference hg19 via Bowtie,Data were normalized using DESeq in R.,Genome_build: hg19,Supplementary_files_format_and_content: TSV file with normalized read counts for each sample.
GSM1464296		18A	SRA	GPL11154	Homo sapiens	tumor	small cell lung cancer	Illumina,Sequenced reads were trimmed for adaptor sequence, and masked for low-complexity or low-quality sequence, then mapped to Human genome reference hg19 via Bowtie,Data were normalized using DESeq in R.,Genome_build: hg19,Supplementary_files_format_and_content: TSV file with normalized read counts for each sample.
GSM1464297		20A	SRA	GPL11154	Homo sapiens	tumor	small cell lung cancer	Illumina,Sequenced reads were trimmed for adaptor sequence, and masked for low-complexity or low-quality sequence, then mapped to Human genome reference hg19 via Bowtie,Data were normalized using DESeq in R.,Genome_build: hg19,Supplementary_files_format_and_content: TSV file with normalized read counts for each sample.
GSM1464298		21A	SRA	GPL11154	Homo sapiens	tumor	small cell lung cancer	Illumina,Sequenced reads were trimmed for adaptor sequence, and masked for low-complexity or low-quality sequence, then mapped to Human genome reference hg19 via Bowtie,Data were normalized using DESeq in R.,Genome_build: hg19,Supplementary_files_format_and_content: TSV file with normalized read counts for each sample.
GSM1464299		22A	SRA	GPL11154	Homo sapiens	tumor	small cell lung cancer	Illumina,Sequenced reads were trimmed for adaptor sequence, and masked for low-complexity or low-quality sequence, then mapped to Human genome reference hg19 via Bowtie,Data were normalized using DESeq in R.,Genome_build: hg19,Supplementary_files_format_and_content: TSV file with normalized read counts for each sample.
GSM1464300		23A	SRA	GPL11154	Homo sapiens	tumor	small cell lung cancer	Illumina,Sequenced reads were trimmed for adaptor sequence, and masked for low-complexity or low-quality sequence, then mapped to Human genome reference hg19 via Bowtie,Data were normalized using DESeq in R.,Genome_build: hg19,Supplementary_files_format_and_content: TSV file with normalized read counts for each sample.
GSM1464301		25A	SRA	GPL11154	Homo sapiens	tumor	small cell lung cancer	Illumina,Sequenced reads were trimmed for adaptor sequence, and masked for low-complexity or low-quality sequence, then mapped to Human genome reference hg19 via Bowtie,Data were normalized using DESeq in R.,Genome_build: hg19,Supplementary_files_format_and_content: TSV file with normalized read counts for each sample.
GSM1464302		26A	SRA	GPL11154	Homo sapiens	tumor	small cell lung cancer	Illumina,Sequenced reads were trimmed for adaptor sequence, and masked for low-complexity or low-quality sequence, then mapped to Human genome reference hg19 via Bowtie,Data were normalized using DESeq in R.,Genome_build: hg19,Supplementary_files_format_and_content: TSV file with normalized read counts for each sample.
GSM1464303		27A	SRA	GPL11154	Homo sapiens	tumor	small cell lung cancer	Illumina,Sequenced reads were trimmed for adaptor sequence, and masked for low-complexity or low-quality sequence, then mapped to Human genome reference hg19 via Bowtie,Data were normalized using DESeq in R.,Genome_build: hg19,Supplementary_files_format_and_content: TSV file with normalized read counts for each sample.
GSM1464304		28A	SRA	GPL11154	Homo sapiens	tumor	small cell lung cancer	Illumina,Sequenced reads were trimmed for adaptor sequence, and masked for low-complexity or low-quality sequence, then mapped to Human genome reference hg19 via Bowtie,Data were normalized using DESeq in R.,Genome_build: hg19,Supplementary_files_format_and_content: TSV file with normalized read counts for each sample.
GSM1464305		29A	SRA	GPL11154	Homo sapiens	tumor	small cell lung cancer	Illumina,Sequenced reads were trimmed for adaptor sequence, and masked for low-complexity or low-quality sequence, then mapped to Human genome reference hg19 via Bowtie,Data were normalized using DESeq in R.,Genome_build: hg19,Supplementary_files_format_and_content: TSV file with normalized read counts for each sample.
GSM1464306		30A	SRA	GPL11154	Homo sapiens	tumor	small cell lung cancer	Illumina,Sequenced reads were trimmed for adaptor sequence, and masked for low-complexity or low-quality sequence, then mapped to Human genome reference hg19 via Bowtie,Data were normalized using DESeq in R.,Genome_build: hg19,Supplementary_files_format_and_content: TSV file with normalized read counts for each sample.
GSM1464307		31A	SRA	GPL11154	Homo sapiens	tumor	small cell lung cancer	Illumina,Sequenced reads were trimmed for adaptor sequence, and masked for low-complexity or low-quality sequence, then mapped to Human genome reference hg19 via Bowtie,Data were normalized using DESeq in R.,Genome_build: hg19,Supplementary_files_format_and_content: TSV file with normalized read counts for each sample.
GSM1464308		32A	SRA	GPL11154	Homo sapiens	tumor	small cell lung cancer	Illumina,Sequenced reads were trimmed for adaptor sequence, and masked for low-complexity or low-quality sequence, then mapped to Human genome reference hg19 via Bowtie,Data were normalized using DESeq in R.,Genome_build: hg19,Supplementary_files_format_and_content: TSV file with normalized read counts for each sample.
GSM1464309		33A	SRA	GPL11154	Homo sapiens	tumor	small cell lung cancer	Illumina,Sequenced reads were trimmed for adaptor sequence, and masked for low-complexity or low-quality sequence, then mapped to Human genome reference hg19 via Bowtie,Data were normalized using DESeq in R.,Genome_build: hg19,Supplementary_files_format_and_content: TSV file with normalized read counts for each sample.
GSM1464310		34A	SRA	GPL11154	Homo sapiens	tumor	small cell lung cancer	Illumina,Sequenced reads were trimmed for adaptor sequence, and masked for low-complexity or low-quality sequence, then mapped to Human genome reference hg19 via Bowtie,Data were normalized using DESeq in R.,Genome_build: hg19,Supplementary_files_format_and_content: TSV file with normalized read counts for each sample.
GSM1464311		36A	SRA	GPL11154	Homo sapiens	tumor	small cell lung cancer	Illumina,Sequenced reads were trimmed for adaptor sequence, and masked for low-complexity or low-quality sequence, then mapped to Human genome reference hg19 via Bowtie,Data were normalized using DESeq in R.,Genome_build: hg19,Supplementary_files_format_and_content: TSV file with normalized read counts for each sample.
GSM1464312		3A	SRA	GPL11154	Homo sapiens	tumor	small cell lung cancer	Illumina,Sequenced reads were trimmed for adaptor sequence, and masked for low-complexity or low-quality sequence, then mapped to Human genome reference hg19 via Bowtie,Data were normalized using DESeq in R.,Genome_build: hg19,Supplementary_files_format_and_content: TSV file with normalized read counts for each sample.
GSM1464313		4A	SRA	GPL11154	Homo sapiens	tumor	small cell lung cancer	Illumina,Sequenced reads were trimmed for adaptor sequence, and masked for low-complexity or low-quality sequence, then mapped to Human genome reference hg19 via Bowtie,Data were normalized using DESeq in R.,Genome_build: hg19,Supplementary_files_format_and_content: TSV file with normalized read counts for each sample.
GSM1464314		5A	SRA	GPL11154	Homo sapiens	tumor	small cell lung cancer	Illumina,Sequenced reads were trimmed for adaptor sequence, and masked for low-complexity or low-quality sequence, then mapped to Human genome reference hg19 via Bowtie,Data were normalized using DESeq in R.,Genome_build: hg19,Supplementary_files_format_and_content: TSV file with normalized read counts for each sample.
GSM1464315		6A	SRA	GPL11154	Homo sapiens	tumor	small cell lung cancer	Illumina,Sequenced reads were trimmed for adaptor sequence, and masked for low-complexity or low-quality sequence, then mapped to Human genome reference hg19 via Bowtie,Data were normalized using DESeq in R.,Genome_build: hg19,Supplementary_files_format_and_content: TSV file with normalized read counts for each sample.
GSM1464316		7A	SRA	GPL11154	Homo sapiens	tumor	small cell lung cancer	Illumina,Sequenced reads were trimmed for adaptor sequence, and masked for low-complexity or low-quality sequence, then mapped to Human genome reference hg19 via Bowtie,Data were normalized using DESeq in R.,Genome_build: hg19,Supplementary_files_format_and_content: TSV file with normalized read counts for each sample.
GSM1464317		8A	SRA	GPL11154	Homo sapiens	tumor	small cell lung cancer	Illumina,Sequenced reads were trimmed for adaptor sequence, and masked for low-complexity or low-quality sequence, then mapped to Human genome reference hg19 via Bowtie,Data were normalized using DESeq in R.,Genome_build: hg19,Supplementary_files_format_and_content: TSV file with normalized read counts for each sample.
GSM1464318		9A	SRA	GPL11154	Homo sapiens	tumor	small cell lung cancer	Illumina,Sequenced reads were trimmed for adaptor sequence, and masked for low-complexity or low-quality sequence, then mapped to Human genome reference hg19 via Bowtie,Data were normalized using DESeq in R.,Genome_build: hg19,Supplementary_files_format_and_content: TSV file with normalized read counts for each sample.
GSM1464319		B07-3747A	SRA	GPL11154	Homo sapiens	tumor	small cell lung cancer	Illumina,Sequenced reads were trimmed for adaptor sequence, and masked for low-complexity or low-quality sequence, then mapped to Human genome reference hg19 via Bowtie,Data were normalized using DESeq in R.,Genome_build: hg19,Supplementary_files_format_and_content: TSV file with normalized read counts for each sample.
GSM1464320		B08-3085A	SRA	GPL11154	Homo sapiens	tumor	small cell lung cancer	Illumina,Sequenced reads were trimmed for adaptor sequence, and masked for low-complexity or low-quality sequence, then mapped to Human genome reference hg19 via Bowtie,Data were normalized using DESeq in R.,Genome_build: hg19,Supplementary_files_format_and_content: TSV file with normalized read counts for each sample.
GSM1464321		B08-3256TA	SRA	GPL11154	Homo sapiens	tumor	small cell lung cancer	Illumina,Sequenced reads were trimmed for adaptor sequence, and masked for low-complexity or low-quality sequence, then mapped to Human genome reference hg19 via Bowtie,Data were normalized using DESeq in R.,Genome_build: hg19,Supplementary_files_format_and_content: TSV file with normalized read counts for each sample.
GSM1464322		B08-3483TA	SRA	GPL11154	Homo sapiens	tumor	small cell lung cancer	Illumina,Sequenced reads were trimmed for adaptor sequence, and masked for low-complexity or low-quality sequence, then mapped to Human genome reference hg19 via Bowtie,Data were normalized using DESeq in R.,Genome_build: hg19,Supplementary_files_format_and_content: TSV file with normalized read counts for each sample.
GSM1464323		B08-3503TA	SRA	GPL11154	Homo sapiens	tumor	small cell lung cancer	Illumina,Sequenced reads were trimmed for adaptor sequence, and masked for low-complexity or low-quality sequence, then mapped to Human genome reference hg19 via Bowtie,Data were normalized using DESeq in R.,Genome_build: hg19,Supplementary_files_format_and_content: TSV file with normalized read counts for each sample.
GSM1464324		B08-3699TA	SRA	GPL11154	Homo sapiens	tumor	small cell lung cancer	Illumina,Sequenced reads were trimmed for adaptor sequence, and masked for low-complexity or low-quality sequence, then mapped to Human genome reference hg19 via Bowtie,Data were normalized using DESeq in R.,Genome_build: hg19,Supplementary_files_format_and_content: TSV file with normalized read counts for each sample.
GSM1464325		B08-3758TA	SRA	GPL11154	Homo sapiens	tumor	small cell lung cancer	Illumina,Sequenced reads were trimmed for adaptor sequence, and masked for low-complexity or low-quality sequence, then mapped to Human genome reference hg19 via Bowtie,Data were normalized using DESeq in R.,Genome_build: hg19,Supplementary_files_format_and_content: TSV file with normalized read counts for each sample.
GSM1464326		B08-4286TA	SRA	GPL11154	Homo sapiens	tumor	small cell lung cancer	Illumina,Sequenced reads were trimmed for adaptor sequence, and masked for low-complexity or low-quality sequence, then mapped to Human genome reference hg19 via Bowtie,Data were normalized using DESeq in R.,Genome_build: hg19,Supplementary_files_format_and_content: TSV file with normalized read counts for each sample.
GSM1464327		B08-4386TA	SRA	GPL11154	Homo sapiens	tumor	small cell lung cancer	Illumina,Sequenced reads were trimmed for adaptor sequence, and masked for low-complexity or low-quality sequence, then mapped to Human genome reference hg19 via Bowtie,Data were normalized using DESeq in R.,Genome_build: hg19,Supplementary_files_format_and_content: TSV file with normalized read counts for each sample.
GSM1464328		B08-4454TA	SRA	GPL11154	Homo sapiens	tumor	small cell lung cancer	Illumina,Sequenced reads were trimmed for adaptor sequence, and masked for low-complexity or low-quality sequence, then mapped to Human genome reference hg19 via Bowtie,Data were normalized using DESeq in R.,Genome_build: hg19,Supplementary_files_format_and_content: TSV file with normalized read counts for each sample.
GSM1464329		B08-4497TA	SRA	GPL11154	Homo sapiens	tumor	small cell lung cancer	Illumina,Sequenced reads were trimmed for adaptor sequence, and masked for low-complexity or low-quality sequence, then mapped to Human genome reference hg19 via Bowtie,Data were normalized using DESeq in R.,Genome_build: hg19,Supplementary_files_format_and_content: TSV file with normalized read counts for each sample.
GSM1464330		B08-4579TA	SRA	GPL11154	Homo sapiens	tumor	small cell lung cancer	Illumina,Sequenced reads were trimmed for adaptor sequence, and masked for low-complexity or low-quality sequence, then mapped to Human genome reference hg19 via Bowtie,Data were normalized using DESeq in R.,Genome_build: hg19,Supplementary_files_format_and_content: TSV file with normalized read counts for each sample.
GSM1464331		B09-450A	SRA	GPL11154	Homo sapiens	tumor	small cell lung cancer	Illumina,Sequenced reads were trimmed for adaptor sequence, and masked for low-complexity or low-quality sequence, then mapped to Human genome reference hg19 via Bowtie,Data were normalized using DESeq in R.,Genome_build: hg19,Supplementary_files_format_and_content: TSV file with normalized read counts for each sample.
GSM1464332		B10-144A	SRA	GPL11154	Homo sapiens	tumor	small cell lung cancer	Illumina,Sequenced reads were trimmed for adaptor sequence, and masked for low-complexity or low-quality sequence, then mapped to Human genome reference hg19 via Bowtie,Data were normalized using DESeq in R.,Genome_build: hg19,Supplementary_files_format_and_content: TSV file with normalized read counts for each sample.
GSM1464333		B10-158A	SRA	GPL11154	Homo sapiens	tumor	small cell lung cancer	Illumina,Sequenced reads were trimmed for adaptor sequence, and masked for low-complexity or low-quality sequence, then mapped to Human genome reference hg19 via Bowtie,Data were normalized using DESeq in R.,Genome_build: hg19,Supplementary_files_format_and_content: TSV file with normalized read counts for each sample.
GSM1464334		B10-1708A	SRA	GPL11154	Homo sapiens	tumor	small cell lung cancer	Illumina,Sequenced reads were trimmed for adaptor sequence, and masked for low-complexity or low-quality sequence, then mapped to Human genome reference hg19 via Bowtie,Data were normalized using DESeq in R.,Genome_build: hg19,Supplementary_files_format_and_content: TSV file with normalized read counts for each sample.
GSM1464335		B10-183A	SRA	GPL11154	Homo sapiens	tumor	small cell lung cancer	Illumina,Sequenced reads were trimmed for adaptor sequence, and masked for low-complexity or low-quality sequence, then mapped to Human genome reference hg19 via Bowtie,Data were normalized using DESeq in R.,Genome_build: hg19,Supplementary_files_format_and_content: TSV file with normalized read counts for each sample.
GSM1464336		B10-2275A	SRA	GPL11154	Homo sapiens	tumor	small cell lung cancer	Illumina,Sequenced reads were trimmed for adaptor sequence, and masked for low-complexity or low-quality sequence, then mapped to Human genome reference hg19 via Bowtie,Data were normalized using DESeq in R.,Genome_build: hg19,Supplementary_files_format_and_content: TSV file with normalized read counts for each sample.
GSM1464337		B10-3353A	SRA	GPL11154	Homo sapiens	tumor	small cell lung cancer	Illumina,Sequenced reads were trimmed for adaptor sequence, and masked for low-complexity or low-quality sequence, then mapped to Human genome reference hg19 via Bowtie,Data were normalized using DESeq in R.,Genome_build: hg19,Supplementary_files_format_and_content: TSV file with normalized read counts for each sample.
GSM1464338		B10-3514A	SRA	GPL11154	Homo sapiens	tumor	small cell lung cancer	Illumina,Sequenced reads were trimmed for adaptor sequence, and masked for low-complexity or low-quality sequence, then mapped to Human genome reference hg19 via Bowtie,Data were normalized using DESeq in R.,Genome_build: hg19,Supplementary_files_format_and_content: TSV file with normalized read counts for each sample.
GSM1464339		B10-363A	SRA	GPL11154	Homo sapiens	tumor	small cell lung cancer	Illumina,Sequenced reads were trimmed for adaptor sequence, and masked for low-complexity or low-quality sequence, then mapped to Human genome reference hg19 via Bowtie,Data were normalized using DESeq in R.,Genome_build: hg19,Supplementary_files_format_and_content: TSV file with normalized read counts for each sample.
GSM1464340		B10-3851A	SRA	GPL11154	Homo sapiens	tumor	small cell lung cancer	Illumina,Sequenced reads were trimmed for adaptor sequence, and masked for low-complexity or low-quality sequence, then mapped to Human genome reference hg19 via Bowtie,Data were normalized using DESeq in R.,Genome_build: hg19,Supplementary_files_format_and_content: TSV file with normalized read counts for each sample.
GSM1464341		B10-4161A	SRA	GPL11154	Homo sapiens	tumor	small cell lung cancer	Illumina,Sequenced reads were trimmed for adaptor sequence, and masked for low-complexity or low-quality sequence, then mapped to Human genome reference hg19 via Bowtie,Data were normalized using DESeq in R.,Genome_build: hg19,Supplementary_files_format_and_content: TSV file with normalized read counts for each sample.
GSM1464342		B10-4914A	SRA	GPL11154	Homo sapiens	tumor	small cell lung cancer	Illumina,Sequenced reads were trimmed for adaptor sequence, and masked for low-complexity or low-quality sequence, then mapped to Human genome reference hg19 via Bowtie,Data were normalized using DESeq in R.,Genome_build: hg19,Supplementary_files_format_and_content: TSV file with normalized read counts for each sample.
GSM1464343		B10-5116A	SRA	GPL11154	Homo sapiens	tumor	small cell lung cancer	Illumina,Sequenced reads were trimmed for adaptor sequence, and masked for low-complexity or low-quality sequence, then mapped to Human genome reference hg19 via Bowtie,Data were normalized using DESeq in R.,Genome_build: hg19,Supplementary_files_format_and_content: TSV file with normalized read counts for each sample.
GSM1464344		B10-5210A	SRA	GPL11154	Homo sapiens	tumor	small cell lung cancer	Illumina,Sequenced reads were trimmed for adaptor sequence, and masked for low-complexity or low-quality sequence, then mapped to Human genome reference hg19 via Bowtie,Data were normalized using DESeq in R.,Genome_build: hg19,Supplementary_files_format_and_content: TSV file with normalized read counts for each sample.
GSM1464345		B10-5295A	SRA	GPL11154	Homo sapiens	tumor	small cell lung cancer	Illumina,Sequenced reads were trimmed for adaptor sequence, and masked for low-complexity or low-quality sequence, then mapped to Human genome reference hg19 via Bowtie,Data were normalized using DESeq in R.,Genome_build: hg19,Supplementary_files_format_and_content: TSV file with normalized read counts for each sample.
GSM1464346		B10-5346A	SRA	GPL11154	Homo sapiens	tumor	small cell lung cancer	Illumina,Sequenced reads were trimmed for adaptor sequence, and masked for low-complexity or low-quality sequence, then mapped to Human genome reference hg19 via Bowtie,Data were normalized using DESeq in R.,Genome_build: hg19,Supplementary_files_format_and_content: TSV file with normalized read counts for each sample.
GSM1464347		B10-5484A	SRA	GPL11154	Homo sapiens	tumor	small cell lung cancer	Illumina,Sequenced reads were trimmed for adaptor sequence, and masked for low-complexity or low-quality sequence, then mapped to Human genome reference hg19 via Bowtie,Data were normalized using DESeq in R.,Genome_build: hg19,Supplementary_files_format_and_content: TSV file with normalized read counts for each sample.
GSM1464348		B10-5656A	SRA	GPL11154	Homo sapiens	tumor	small cell lung cancer	Illumina,Sequenced reads were trimmed for adaptor sequence, and masked for low-complexity or low-quality sequence, then mapped to Human genome reference hg19 via Bowtie,Data were normalized using DESeq in R.,Genome_build: hg19,Supplementary_files_format_and_content: TSV file with normalized read counts for each sample.
GSM1464349		B10-5716A	SRA	GPL11154	Homo sapiens	tumor	small cell lung cancer	Illumina,Sequenced reads were trimmed for adaptor sequence, and masked for low-complexity or low-quality sequence, then mapped to Human genome reference hg19 via Bowtie,Data were normalized using DESeq in R.,Genome_build: hg19,Supplementary_files_format_and_content: TSV file with normalized read counts for each sample.
GSM1464350		B10-6017A	SRA	GPL11154	Homo sapiens	tumor	small cell lung cancer	Illumina,Sequenced reads were trimmed for adaptor sequence, and masked for low-complexity or low-quality sequence, then mapped to Human genome reference hg19 via Bowtie,Data were normalized using DESeq in R.,Genome_build: hg19,Supplementary_files_format_and_content: TSV file with normalized read counts for each sample.
GSM1464351		B10-6122A	SRA	GPL11154	Homo sapiens	tumor	small cell lung cancer	Illumina,Sequenced reads were trimmed for adaptor sequence, and masked for low-complexity or low-quality sequence, then mapped to Human genome reference hg19 via Bowtie,Data were normalized using DESeq in R.,Genome_build: hg19,Supplementary_files_format_and_content: TSV file with normalized read counts for each sample.
GSM1464352		B11-1085A	SRA	GPL11154	Homo sapiens	tumor	small cell lung cancer	Illumina,Sequenced reads were trimmed for adaptor sequence, and masked for low-complexity or low-quality sequence, then mapped to Human genome reference hg19 via Bowtie,Data were normalized using DESeq in R.,Genome_build: hg19,Supplementary_files_format_and_content: TSV file with normalized read counts for each sample.
GSM1464353		B11-2810A	SRA	GPL11154	Homo sapiens	tumor	small cell lung cancer	Illumina,Sequenced reads were trimmed for adaptor sequence, and masked for low-complexity or low-quality sequence, then mapped to Human genome reference hg19 via Bowtie,Data were normalized using DESeq in R.,Genome_build: hg19,Supplementary_files_format_and_content: TSV file with normalized read counts for each sample.
GSM1464354		B11-283A	SRA	GPL11154	Homo sapiens	tumor	small cell lung cancer	Illumina,Sequenced reads were trimmed for adaptor sequence, and masked for low-complexity or low-quality sequence, then mapped to Human genome reference hg19 via Bowtie,Data were normalized using DESeq in R.,Genome_build: hg19,Supplementary_files_format_and_content: TSV file with normalized read counts for each sample.
GSM1464355		B11-4430A	SRA	GPL11154	Homo sapiens	tumor	small cell lung cancer	Illumina,Sequenced reads were trimmed for adaptor sequence, and masked for low-complexity or low-quality sequence, then mapped to Human genome reference hg19 via Bowtie,Data were normalized using DESeq in R.,Genome_build: hg19,Supplementary_files_format_and_content: TSV file with normalized read counts for each sample.
GSM1464356		B11-4A	SRA	GPL11154	Homo sapiens	tumor	small cell lung cancer	Illumina,Sequenced reads were trimmed for adaptor sequence, and masked for low-complexity or low-quality sequence, then mapped to Human genome reference hg19 via Bowtie,Data were normalized using DESeq in R.,Genome_build: hg19,Supplementary_files_format_and_content: TSV file with normalized read counts for each sample.
GSM1464357		B12-1353A	SRA	GPL11154	Homo sapiens	tumor	small cell lung cancer	Illumina,Sequenced reads were trimmed for adaptor sequence, and masked for low-complexity or low-quality sequence, then mapped to Human genome reference hg19 via Bowtie,Data were normalized using DESeq in R.,Genome_build: hg19,Supplementary_files_format_and_content: TSV file with normalized read counts for each sample.
GSM1464358		B12-1662A	SRA	GPL11154	Homo sapiens	tumor	small cell lung cancer	Illumina,Sequenced reads were trimmed for adaptor sequence, and masked for low-complexity or low-quality sequence, then mapped to Human genome reference hg19 via Bowtie,Data were normalized using DESeq in R.,Genome_build: hg19,Supplementary_files_format_and_content: TSV file with normalized read counts for each sample.
GSM1464359		B12-2013A	SRA	GPL11154	Homo sapiens	tumor	small cell lung cancer	Illumina,Sequenced reads were trimmed for adaptor sequence, and masked for low-complexity or low-quality sequence, then mapped to Human genome reference hg19 via Bowtie,Data were normalized using DESeq in R.,Genome_build: hg19,Supplementary_files_format_and_content: TSV file with normalized read counts for each sample.
GSM1464360		B12-703A	SRA	GPL11154	Homo sapiens	tumor	small cell lung cancer	Illumina,Sequenced reads were trimmed for adaptor sequence, and masked for low-complexity or low-quality sequence, then mapped to Human genome reference hg19 via Bowtie,Data were normalized using DESeq in R.,Genome_build: hg19,Supplementary_files_format_and_content: TSV file with normalized read counts for each sample.
GSM1464361		B12-738A	SRA	GPL11154	Homo sapiens	tumor	small cell lung cancer	Illumina,Sequenced reads were trimmed for adaptor sequence, and masked for low-complexity or low-quality sequence, then mapped to Human genome reference hg19 via Bowtie,Data were normalized using DESeq in R.,Genome_build: hg19,Supplementary_files_format_and_content: TSV file with normalized read counts for each sample.
GSM1464362		B12-814A	SRA	GPL11154	Homo sapiens	tumor	small cell lung cancer	Illumina,Sequenced reads were trimmed for adaptor sequence, and masked for low-complexity or low-quality sequence, then mapped to Human genome reference hg19 via Bowtie,Data were normalized using DESeq in R.,Genome_build: hg19,Supplementary_files_format_and_content: TSV file with normalized read counts for each sample.
GSM1464363		T10-5656A	SRA	GPL11154	Homo sapiens	tumor	small cell lung cancer	Illumina,Sequenced reads were trimmed for adaptor sequence, and masked for low-complexity or low-quality sequence, then mapped to Human genome reference hg19 via Bowtie,Data were normalized using DESeq in R.,Genome_build: hg19,Supplementary_files_format_and_content: TSV file with normalized read counts for each sample.
GSM1464364		T11-4067A	SRA	GPL11154	Homo sapiens	tumor	small cell lung cancer	Illumina,Sequenced reads were trimmed for adaptor sequence, and masked for low-complexity or low-quality sequence, then mapped to Human genome reference hg19 via Bowtie,Data were normalized using DESeq in R.,Genome_build: hg19,Supplementary_files_format_and_content: TSV file with normalized read counts for each sample.
GSM1464365		T11-548A	SRA	GPL11154	Homo sapiens	tumor	small cell lung cancer	Illumina,Sequenced reads were trimmed for adaptor sequence, and masked for low-complexity or low-quality sequence, then mapped to Human genome reference hg19 via Bowtie,Data were normalized using DESeq in R.,Genome_build: hg19,Supplementary_files_format_and_content: TSV file with normalized read counts for each sample.
GSM1464366		T12-1866A	SRA	GPL11154	Homo sapiens	tumor	small cell lung cancer	Illumina,Sequenced reads were trimmed for adaptor sequence, and masked for low-complexity or low-quality sequence, then mapped to Human genome reference hg19 via Bowtie,Data were normalized using DESeq in R.,Genome_build: hg19,Supplementary_files_format_and_content: TSV file with normalized read counts for each sample.
GSM1464367		T12-3716A	SRA	GPL11154	Homo sapiens	tumor	small cell lung cancer	Illumina,Sequenced reads were trimmed for adaptor sequence, and masked for low-complexity or low-quality sequence, then mapped to Human genome reference hg19 via Bowtie,Data were normalized using DESeq in R.,Genome_build: hg19,Supplementary_files_format_and_content: TSV file with normalized read counts for each sample.
