# Supplementary material for: Analysis of Chromosome 3P Genes Associated With Clinical Staging of Small Cell Lung Cancer and Prediction of Targeted Drugs
Source: Research Square preprint supplement (doi:10.21203/rs.3.rs-1050186/v1), 2021-11-16
Supplement: Supplementary file 24 [file d0abe7ca9a7ac2c15c8b05ba.xlsx]

## Sheet: GSE60052.diffSig
Symbol	logFC	AveExpr	t	P.Value	adj.P.Val	B
ITLN2	-4.06519	0.951272	-10.9093	7.64596e-18	3.90945e-13	29.6213
CA4	-4.43089	1.10499	-10.2149	1.87708e-16	4.79885e-12	26.6116
RP11-133I21.2	-2.04268	0.434639	-9.59225	3.38464e-15	5.76866e-11	23.8835
RP11-114H24.5	-5.89093	1.98176	-9.46882	6.01484e-15	7.68862e-11	23.3403
AGER	-4.26349	5.54266	-9.19738	2.13234e-14	2.18058e-10	22.1437
RP11-475O23.2	-4.02579	1.08935	-8.98719	5.68445e-14	4.29754e-10	21.2159
RP3-398G3.5	-1.68469	0.322504	-8.96045	6.43978e-14	4.29754e-10	21.0978
MRC1L1	-4.14743	1.20552	-8.95119	6.72397e-14	4.29754e-10	21.0569
RP11-415D17.3	-2.8237	0.686483	-8.90421	8.37162e-14	4.7561e-10	20.8494
RN5S206	-1.2978	0.235678	-8.87627	9.53703e-14	4.87638e-10	20.726
SNAP25	3.56545	5.85838	8.85481	1.0541e-13	4.89972e-10	20.6312
OR5P1P	-3.33058	0.841464	-8.78547	1.45661e-13	6.20651e-10	20.3249
RPS20P31	-2.69146	0.739547	-8.76548	1.59888e-13	6.28866e-10	20.2366
MMP28	-3.00237	0.658744	-8.69621	2.2085e-13	8.06593e-10	19.9306
RP11-1099M24.8	-1.93474	0.397429	-8.56822	4.0104e-13	1.36704e-09	19.3653
AREG	-1.58329	0.314084	-8.49561	5.62437e-13	1.69988e-09	19.0447
FIGF	-4.31275	1.27663	-8.49457	5.65175e-13	1.69988e-09	19.0401
RP11-59N23.3	-2.281	0.485145	-8.37981	9.64276e-13	2.73913e-09	18.5336
AC073850.6	-1.92069	0.352011	-8.34257	1.14672e-12	3.08595e-09	18.3692
AC008268.1	-2.91766	0.590886	-8.32042	1.27112e-12	3.24968e-09	18.2716
CLEC3B	-3.96946	1.12895	-8.26039	1.68038e-12	4.09141e-09	18.0068
GGTLC1	-2.99475	0.745458	-8.24184	1.83169e-12	4.23006e-09	17.9251
PGC	-5.63673	3.26968	-8.23365	1.90279e-12	4.23006e-09	17.889
HBA2	-6.1902	2.22227	-8.14841	2.82699e-12	6.00838e-09	17.5134
EPAS1	-3.88917	7.81242	-8.13869	2.95748e-12	6.00838e-09	17.4706
GKN2	-2.98117	0.723803	-8.13169	3.05525e-12	6.00838e-09	17.4397
RP11-346M5.3	-1.46352	0.275157	-8.01063	5.35661e-12	1.0144e-08	16.907
ADRB2	-4.52922	2.10227	-7.96793	6.52841e-12	1.19216e-08	16.7193
RP11-325F22.5	-3.82356	0.944674	-7.95502	6.93039e-12	1.22192e-08	16.6626
MRC1	-2.02256	0.465036	-7.92299	8.03837e-12	1.37003e-08	16.5218
RP11-779O18.2	-1.15517	0.213768	-7.90879	8.5843e-12	1.41588e-08	16.4595
WNT3A	-2.94701	0.887929	-7.87455	1.00575e-11	1.60702e-08	16.3092
RP1-127D3.4	-3.9177	1.16245	-7.80164	1.40882e-11	2.18286e-08	15.9893
RP11-446J8.1	-3.72226	1.11717	-7.79331	1.46404e-11	2.18526e-08	15.9528
DLC1	-3.69402	5.97499	-7.78866	1.49585e-11	2.18526e-08	15.9324
SLC19A3	-3.86406	1.40713	-7.75049	1.78402e-11	2.3951e-08	15.7652
RP11-506G7.1	-3.08726	0.963865	-7.75034	1.78532e-11	2.3951e-08	15.7645
EMP2	-2.51537	7.92711	-7.74986	1.78929e-11	2.3951e-08	15.7624
HBA1	-5.92371	2.1386	-7.74355	1.84216e-11	2.3951e-08	15.7347
RP13-213K19.1	-2.91037	0.711147	-7.73987	1.8737e-11	2.3951e-08	15.7186
RP11-168O10.6	-1.06124	0.240242	-7.67397	2.53904e-11	3.16643e-08	15.4301
RP11-864I4.3	-2.67817	0.601398	-7.64159	2.94738e-11	3.58816e-08	15.2886
RP11-664I21.5	-3.43701	1.06187	-7.63277	3.0696e-11	3.65004e-08	15.25
NOTCH4	-2.93394	6.71925	-7.61874	3.27444e-11	3.80513e-08	15.1887
ICAM4	-3.3319	0.748068	-7.57614	3.98348e-11	4.52621e-08	15.0026
SDR16C5	-4.54406	1.65114	-7.53686	4.77167e-11	5.30392e-08	14.8312
NIPA2P5	-1.30791	0.316124	-7.51346	5.31317e-11	5.78017e-08	14.7291
RPL39P	-2.32611	0.48889	-7.4954	5.77263e-11	6.14917e-08	14.6504
C19orf33	-3.44125	1.16908	-7.42164	8.09646e-11	8.44857e-08	14.3292
PEBP4	-4.0669	1.53443	-7.41587	8.31344e-11	8.50149e-08	14.304
ABCA3	-2.69543	7.67707	-7.3898	9.36783e-11	9.31614e-08	14.1907
SFTA2	-4.00822	1.14696	-7.38733	9.47447e-11	9.31614e-08	14.1799
POLQ	3.6063	6.2646	7.37788	9.89368e-11	9.54479e-08	14.1388
ADRB1	-4.31482	1.60052	-7.35429	1.10214e-10	1.04358e-07	14.0363
CAV1	-4.71285	4.71089	-7.34662	1.14149e-10	1.06119e-07	14.003
PDZK1IP1	-3.28687	1.06031	-7.33728	1.19129e-10	1.08771e-07	13.9625
GPIHBP1	-4.40121	2.03546	-7.30916	1.35469e-10	1.21521e-07	13.8404
VWF	-3.26329	7.25373	-7.2905	1.47523e-10	1.30052e-07	13.7595
CLIC3	-3.37808	1.2267	-7.2751	1.58275e-10	1.32934e-07	13.6927
GCOM1	-2.6689	0.779396	-7.27466	1.58589e-10	1.32934e-07	13.6908
SHROOM4	-3.84665	5.47874	-7.27466	1.58592e-10	1.32934e-07	13.6908
CXCL2	-5.4351	2.73344	-7.25593	1.72746e-10	1.42462e-07	13.6096
RP11-95I16.2	-2.67685	0.674809	-7.24974	1.77692e-10	1.44215e-07	13.5828
CYP4Z2P	-4.3028	1.56388	-7.22594	1.98063e-10	1.57412e-07	13.4798
PTPRB	-3.76445	6.26582	-7.22369	2.00109e-10	1.57412e-07	13.47
EDN1	-4.59701	2.50619	-7.21319	2.09921e-10	1.62628e-07	13.4245
CTC-558O2.2	-3.74145	1.33502	-7.1885	2.34908e-10	1.7927e-07	13.3178
CSF3	-4.95028	2.05976	-7.15022	2.79621e-10	2.10254e-07	13.1523
CH25H	-3.24957	0.920267	-7.12673	3.11146e-10	2.30568e-07	13.0509
FAM40B	2.38444	5.00445	7.10832	3.3829e-10	2.47102e-07	12.9715
GDF10	-2.61594	0.693	-7.10088	3.49922e-10	2.5071e-07	12.9394
MSLN	-4.64965	1.91615	-7.09893	3.53036e-10	2.5071e-07	12.931
SFTPC	-7.08111	4.74217	-7.09084	3.66247e-10	2.56529e-07	12.8961
RP11-88L24.4	-3.56696	1.23438	-7.07083	4.01077e-10	2.77128e-07	12.8098
AC016745.2	-1.48509	0.316977	-7.06478	4.12231e-10	2.81037e-07	12.7838
LGI3	-4.67099	1.91339	-7.05881	4.23563e-10	2.84963e-07	12.758
MARCO	-4.54694	1.81302	-7.05403	4.32829e-10	2.87415e-07	12.7375
RP11-550F7.1	-2.27623	0.617533	-7.04881	4.43205e-10	2.90532e-07	12.715
OR5P2	-2.3486	0.593659	-7.04396	4.53064e-10	2.93236e-07	12.6941
RP11-399K21.5	-1.0729	0.216647	-7.01664	5.12768e-10	3.27729e-07	12.5766
FABP4	-2.91755	0.999268	-7.00462	5.4146e-10	3.41795e-07	12.5249
FPR1	-3.54731	1.26459	-6.96529	6.46936e-10	3.98536e-07	12.3559
SFTA1P	-3.92718	1.60779	-6.91562	8.09694e-10	4.92863e-07	12.1428
ICAM1	-4.82671	4.93293	-6.90992	8.3082e-10	4.95992e-07	12.1184
STX11	-3.95112	2.13953	-6.90901	8.34236e-10	4.95992e-07	12.1145
HBB	-5.78992	3.22402	-6.9006	8.66517e-10	5.09263e-07	12.0785
CLDN18	-4.27697	4.7108	-6.88532	9.2833e-10	5.39391e-07	12.013
PSORS1C3	-2.91823	1.10077	-6.87744	9.61915e-10	5.46485e-07	11.9793
RP11-17A4.3	-1.73742	0.422073	-6.8681	1.00327e-09	5.63714e-07	11.9393
NUP155	1.79289	7.67846	6.84705	1.10307e-09	6.13055e-07	11.8493
RP11-46C24.8	-4.48155	1.73609	-6.83507	1.16418e-09	6.40064e-07	11.7981
DUOX1	-2.63602	7.12227	-6.82001	1.24585e-09	6.77674e-07	11.7338
SCEL	-4.35534	2.23043	-6.8134	1.28343e-09	6.9014e-07	11.7056
ANKRD29	-3.97544	1.88566	-6.81052	1.30018e-09	6.9014e-07	11.6932
SDPR	-4.86891	3.78195	-6.80667	1.32284e-09	6.90187e-07	11.6768
FAM107A	-4.96359	3.90997	-6.74764	1.72453e-09	8.90675e-07	11.4251
SFTPD	-4.92173	2.95061	-6.73508	1.82444e-09	9.32857e-07	11.3717
CHEK1	3.44701	5.39803	6.72439	1.91401e-09	9.67875e-07	11.3262
RP11-429A24.4	-2.50954	0.807815	-6.72244	1.93079e-09	9.67875e-07	11.3179
TPSD1	-2.34215	0.642199	-6.70642	2.0745e-09	1.02982e-06	11.2498
SCEL-AS1	-1.60189	0.345398	-6.69241	2.20882e-09	1.08595e-06	11.1902
AKAP13	-2.00696	9.24218	-6.68257	2.30825e-09	1.12403e-06	11.1484
E2F2	3.45708	6.29532	6.67333	2.4057e-09	1.16043e-06	11.1092
BTNL9	-4.68051	4.85592	-6.66873	2.45566e-09	1.17346e-06	11.0897
TNNC1	-3.34074	0.940231	-6.65992	2.55436e-09	1.20933e-06	11.0523
SPTBN1	-1.80874	9.95372	-6.6508	2.66066e-09	1.24809e-06	11.0136
CEACAM4	-3.09908	1.04498	-6.63584	2.8445e-09	1.3222e-06	10.9502
PLA2G4F	-5.45326	2.99467	-6.63297	2.88119e-09	1.32719e-06	10.938
RP11-1024P17.1	-2.60398	0.801416	-6.63055	2.91249e-09	1.32963e-06	10.9277
AC099537.1	-1.10349	0.289272	-6.62313	3.01059e-09	1.35078e-06	10.8963
CCDC64	2.13431	6.96357	6.62305	3.01165e-09	1.35078e-06	10.896
ST18	3.99957	8.07628	6.61857	3.07251e-09	1.36609e-06	10.877
CES1	-4.47793	1.89348	-6.60923	3.20321e-09	1.41192e-06	10.8375
ANKRD1	-3.75261	1.60203	-6.60583	3.2522e-09	1.41644e-06	10.8231
FCN3	-3.72181	1.33492	-6.60374	3.28266e-09	1.41644e-06	10.8142
UPK3B	-4.19846	2.11106	-6.60279	3.29656e-09	1.41644e-06	10.8102
FCN1	-3.58839	1.31374	-6.5864	3.54653e-09	1.51115e-06	10.7408
RP11-290F20.3	-3.79792	1.67282	-6.57683	3.7011e-09	1.56397e-06	10.7004
WIF1	-3.98189	1.57674	-6.57067	3.80391e-09	1.59424e-06	10.6744
MCM2	2.81991	6.98761	6.56877	3.83631e-09	1.59475e-06	10.6663
RP3-365O12.2	-2.54512	1.01219	-6.56573	3.88859e-09	1.60345e-06	10.6535
GAPDHP59	-2.55265	0.778534	-6.55662	4.04957e-09	1.65647e-06	10.615
PER1	-3.05793	7.20004	-6.55233	4.12766e-09	1.67501e-06	10.5968
S1PR4	-2.82575	1.0083	-6.53008	4.55694e-09	1.83465e-06	10.503
MANEAL	3.53239	5.94638	6.52616	4.63712e-09	1.85235e-06	10.4864
ANKS1A	-1.56907	7.15212	-6.50562	5.0802e-09	1.99519e-06	10.3998
AC003991.3	-3.23741	1.26449	-6.50458	5.10359e-09	1.99519e-06	10.3955
RP11-243M5.1	-1.70222	0.419318	-6.50422	5.11176e-09	1.99519e-06	10.394
LMNA	-2.21269	7.61347	-6.49603	5.30105e-09	2.05339e-06	10.3595
ECE2	3.85464	5.47124	6.48096	5.66773e-09	2.17892e-06	10.296
TENC1	-2.13065	7.52383	-6.47731	5.76022e-09	2.19796e-06	10.2806
RP11-613D13.8	-3.94531	1.75937	-6.46983	5.95457e-09	2.25528e-06	10.2492
CYP4B1	-5.05275	3.71631	-6.46637	6.04649e-09	2.27326e-06	10.2346
COL4A3	-3.12968	5.18433	-6.44378	6.68321e-09	2.4943e-06	10.1396
IL4R	-2.99179	5.93888	-6.44156	6.74902e-09	2.50061e-06	10.1304
RP11-76C10.5	-3.84966	1.57869	-6.43794	6.85819e-09	2.51848e-06	10.1151
LRRK2	-3.93499	5.80301	-6.4358	6.92349e-09	2.51848e-06	10.1061
FOLR1	-4.43833	2.21358	-6.4351	6.94503e-09	2.51848e-06	10.1032
DENND3	-1.76061	7.48924	-6.42932	7.12491e-09	2.56552e-06	10.0789
CDH5	-3.73278	4.99684	-6.41316	7.6527e-09	2.73629e-06	10.0112
NFKBIA	-3.25604	6.2605	-6.40303	8.00319e-09	2.84174e-06	9.96867
ACVRL1	-3.77593	4.68736	-6.39853	8.16402e-09	2.87772e-06	9.9498
DNMT3A	1.7753	7.92271	6.39635	8.24306e-09	2.87772e-06	9.94066
TACC1	-2.1129	7.97392	-6.39552	8.27336e-09	2.87772e-06	9.93718
CSRNP1	-4.50112	4.97688	-6.39262	8.38002e-09	2.89513e-06	9.92503
RNF128	-3.0532	1.36091	-6.38804	8.55135e-09	2.93449e-06	9.90583
MSI2	1.72529	9.36984	6.37815	8.93305e-09	3.04504e-06	9.86441
SUSD2	-4.30275	4.70088	-6.37068	9.23243e-09	3.12625e-06	9.83315
CENPK	2.86842	5.403	6.34143	1.05034e-08	3.53323e-06	9.71082
RP11-494M8.1	-1.94239	0.405566	-6.33943	1.05967e-08	3.54131e-06	9.70243
GPRC5A	-4.60524	6.09641	-6.32723	1.11816e-08	3.69443e-06	9.65148
AC098617.2	-3.56297	1.15206	-6.32687	1.11994e-08	3.69443e-06	9.64997
CCNF	2.58292	6.67188	6.32483	1.13e-08	3.70373e-06	9.64149
TMPRSS2	-4.64998	3.52528	-6.32214	1.14348e-08	3.72404e-06	9.63024
NEK2	3.60636	4.54058	6.3117	1.19728e-08	3.87457e-06	9.58664
RP11-27M24.2	-2.94024	1.46633	-6.30817	1.216e-08	3.9104e-06	9.57193
RALYL	4.80485	5.48578	6.30572	1.22917e-08	3.92806e-06	9.56171
CPM	-2.25775	6.47016	-6.29736	1.27519e-08	4.0323e-06	9.52686
ADAMTS8	-3.80588	2.21387	-6.29694	1.27757e-08	4.0323e-06	9.52509
CLEC14A	-3.74876	2.96766	-6.28619	1.33935e-08	4.20138e-06	9.48031
SLC34A2	-4.54105	6.4313	-6.27866	1.38442e-08	4.31628e-06	9.44892
SYNDIG1L	-2.67361	0.974233	-6.27273	1.42097e-08	4.40337e-06	9.42422
NAPSA	-4.41287	3.99719	-6.26414	1.47555e-08	4.54496e-06	9.38848
CTA-363E6.2	-3.35814	1.16227	-6.25943	1.50639e-08	4.60433e-06	9.36886
AC007182.6	-3.20942	1.37598	-6.25846	1.51283e-08	4.60433e-06	9.36482
RP11-4C20.3	-2.2214	0.765326	-6.25436	1.54026e-08	4.66008e-06	9.34778
EXOSC2	1.48567	6.43557	6.25239	1.55363e-08	4.67287e-06	9.33959
A2M	-3.43951	7.77574	-6.24228	1.62405e-08	4.85611e-06	9.29756
VCL	-2.25626	6.91067	-6.22878	1.72305e-08	5.10992e-06	9.24146
AOC3	-4.57723	4.24702	-6.228	1.72893e-08	5.10992e-06	9.23823
SFTPA2	-6.76508	6.80759	-6.22637	1.74138e-08	5.11714e-06	9.23143
SYNE1	-2.73224	8.2324	-6.22131	1.78037e-08	5.20184e-06	9.21043
GINS4	2.56384	4.7949	6.21772	1.80859e-08	5.25425e-06	9.19552
GPR116	-3.90727	5.97738	-6.20671	1.89787e-08	5.48248e-06	9.14984
PPP1R14A	-2.92737	1.06541	-6.20396	1.92084e-08	5.51575e-06	9.13844
GPR77	-1.67444	0.452655	-6.20276	1.93096e-08	5.51575e-06	9.13345
LGALS2	-3.18283	1.2179	-6.19422	2.00443e-08	5.6938e-06	9.09805
FAM124B	-2.72804	1.18026	-6.19168	2.0268e-08	5.71001e-06	9.08753
RGCC	-4.61814	3.42043	-6.19105	2.03247e-08	5.71001e-06	9.08488
AC105206.1	-3.96697	2.07522	-6.18835	2.05659e-08	5.7462e-06	9.0737
RP11-88L24.3	-3.6141	1.57538	-6.18552	2.08218e-08	5.78608e-06	9.06198
SCGB1A1	-5.39253	2.45168	-6.18321	2.10331e-08	5.81321e-06	9.05241
FOXF1	-4.07727	2.42966	-6.17288	2.20045e-08	6.049e-06	9.00961
TBX4	-4.31869	2.34784	-6.17066	2.22189e-08	6.07527e-06	9.00042
S1PR1	-3.84579	3.79101	-6.16263	2.30115e-08	6.22541e-06	8.96719
CD93	-3.4903	5.81184	-6.15993	2.32845e-08	6.26611e-06	8.95601
DLG3	1.87295	7.21418	6.15781	2.35004e-08	6.27132e-06	8.94727
KIAA1462	-2.92876	5.76642	-6.15734	2.35492e-08	6.27132e-06	8.9453
RP11-923I11.1	3.22811	4.68336	6.15431	2.38622e-08	6.32175e-06	8.93278
MYL1	-2.73593	0.820021	-6.15032	2.42812e-08	6.39959e-06	8.91629
GPR137C	3.21148	5.84515	6.14852	2.44733e-08	6.41716e-06	8.90881
RP11-264F23.3	-3.2187	1.26595	-6.14464	2.48909e-08	6.49335e-06	8.89278
TBX21	-3.4976	1.66333	-6.13932	2.54748e-08	6.60732e-06	8.8708
MUC1	-2.59633	6.71039	-6.13832	2.55862e-08	6.60732e-06	8.86667
MFI2	3.2072	6.4994	6.12842	2.67148e-08	6.86409e-06	8.82576
PAPSS2	-3.91114	3.56661	-6.12498	2.71172e-08	6.93231e-06	8.81159
TPSAB1	-4.189	1.52539	-6.12385	2.72515e-08	6.93231e-06	8.80691
C4BPA	-4.72507	2.03357	-6.11383	2.84668e-08	7.20562e-06	8.76556
RP11-88L24.1	-4.0979	1.6381	-6.11035	2.89014e-08	7.2796e-06	8.75119
PDZD2	-2.34686	6.87669	-6.10019	3.0208e-08	7.5714e-06	8.70929
RP11-93B14.5	-3.57903	2.15843	-6.09527	3.08621e-08	7.69762e-06	8.68899
IL1RL1	-4.8368	3.1897	-6.08881	3.17402e-08	7.84168e-06	8.66241
RHOBTB2	-1.73229	7.17334	-6.08877	3.17465e-08	7.84168e-06	8.66222
MYCT1	-3.49922	2.19503	-6.08612	3.21135e-08	7.8942e-06	8.65133
NEDD9	-3.25152	6.75986	-6.0744	3.37918e-08	8.26702e-06	8.60305
CYP4A22-AS1	-2.37388	0.92601	-6.07192	3.41587e-08	8.317e-06	8.59282
RP3-449M8.6	-2.42411	0.786436	-6.06938	3.45373e-08	8.32859e-06	8.58238
RP11-460I13.2	-2.96139	1.45557	-6.0692	3.45635e-08	8.32859e-06	8.58166
TGFBR2	-3.64268	5.7306	-6.06303	3.55025e-08	8.48262e-06	8.55626
PLAC9	-2.95175	1.33039	-6.05798	3.62894e-08	8.6303e-06	8.53549
RAMP3	-3.79949	1.83817	-6.05638	3.65416e-08	8.65004e-06	8.52892
RP11-286E11.1	-3.99765	2.50679	-6.05346	3.70079e-08	8.72004e-06	8.51691
FGFR4	-3.99024	2.63546	-6.04973	3.76111e-08	8.82152e-06	8.50159
ITGA5	-2.53544	6.78802	-6.03746	3.96666e-08	9.26114e-06	8.45118
ICAM5	-3.48063	1.50258	-6.03525	4.00486e-08	9.30784e-06	8.4421
ADH1B	-4.54365	3.81846	-6.03197	4.06226e-08	9.38861e-06	8.42861
RP1-251M9.2	-1.76612	0.476946	-6.03117	4.07633e-08	9.38861e-06	8.42534
FAM189A2	-3.36444	3.77633	-6.01546	4.3633e-08	1.00045e-05	8.36089
SLC39A8	-3.933	4.20264	-6.01299	4.41021e-08	1.00354e-05	8.35076
ARHGAP31	-3.40358	5.68047	-6.01269	4.41602e-08	1.00354e-05	8.34951
RPS26P21	-2.3228	0.771687	-6.00614	4.543e-08	1.02518e-05	8.32265
OR10AB1P	-2.18777	0.669458	-6.00571	4.55137e-08	1.02518e-05	8.32091
HOPX	-4.11783	2.43267	-5.99037	4.86353e-08	1.08986e-05	8.25807
SGMS2	-3.39241	4.15879	-5.9893	4.88621e-08	1.08986e-05	8.25366
SMAD6	-3.51199	2.52516	-5.9885	4.9031e-08	1.08986e-05	8.25039
AQP9	-3.28714	1.69488	-5.98753	4.92376e-08	1.08986e-05	8.24641
FOSB	-4.72576	6.89513	-5.9819	5.04505e-08	1.11189e-05	8.22336
RP1-251M9.3	-1.79614	0.393457	-5.96976	5.31647e-08	1.16668e-05	8.17373
RP11-664I21.6	-3.39537	1.27013	-5.96794	5.35848e-08	1.17087e-05	8.16627
VSIG4	-3.85785	2.24204	-5.94497	5.91663e-08	1.28733e-05	8.07242
LDLR	-2.13839	7.309	-5.94286	5.97059e-08	1.28944e-05	8.06382
C11orf80	2.00584	6.22864	5.94184	5.99711e-08	1.28944e-05	8.05963
SLCO5A1	3.26449	5.50695	5.94165	6.00196e-08	1.28944e-05	8.05886
C19orf59	-3.24316	1.12965	-5.9398	6.05011e-08	1.28985e-05	8.05129
ARL6IP6	2.08407	4.98274	5.93963	6.05435e-08	1.28985e-05	8.05063
UHRF1	2.49018	7.25958	5.93417	6.19847e-08	1.31508e-05	8.02835
TCF21	-4.55385	3.31337	-5.92173	6.53954e-08	1.38171e-05	7.97763
RAB11FIP1	-2.4762	7.33039	-5.92029	6.58029e-08	1.3846e-05	7.97174
ARHGAP26-AS1	-2.94934	1.18673	-5.91451	6.7462e-08	1.41369e-05	7.94816
PRX	-4.17501	2.52605	-5.91305	6.78868e-08	1.41678e-05	7.94222
RP1-69D17.3	-2.27028	0.696346	-5.90989	6.88142e-08	1.4303e-05	7.92937
TMEM63C	4.49757	5.7774	5.90615	6.9932e-08	1.44765e-05	7.91411
RNASE1	-4.38319	4.22633	-5.90243	7.10574e-08	1.46501e-05	7.899
EHD2	-2.9696	5.6306	-5.89048	7.48049e-08	1.53608e-05	7.85033
RP11-720L2.2	-2.03416	0.645952	-5.88828	7.55128e-08	1.54125e-05	7.84141
CDCA8	3.61248	5.6212	5.88783	7.56595e-08	1.54125e-05	7.83958
CXCL3	-3.01633	1.42926	-5.88171	7.76753e-08	1.57604e-05	7.81468
CTSH	-2.88227	5.75532	-5.87968	7.83535e-08	1.58352e-05	7.80645
AC144450.1	-1.91618	0.505925	-5.87187	8.10272e-08	1.6311e-05	7.77468
BRI3BP	2.6005	6.88995	5.87059	8.14735e-08	1.63365e-05	7.76948
DUSP6	-3.01574	5.32514	-5.8676	8.25238e-08	1.64825e-05	7.75735
SIX4	2.60318	6.53522	5.86577	8.31754e-08	1.6548e-05	7.74991
KIF1C	-2.25441	6.56451	-5.86271	8.42749e-08	1.67018e-05	7.73748
EXTL3-AS1	2.82019	4.76895	5.86161	8.46712e-08	1.67155e-05	7.73303
LAMP3	-3.19206	5.7657	-5.85668	8.64828e-08	1.70075e-05	7.71299
EZH2	2.18519	7.72445	5.8545	8.72941e-08	1.71013e-05	7.70415
OVCH2	-3.4996	1.51082	-5.85341	8.77032e-08	1.71158e-05	7.69973
SFTPA1	-6.36354	6.21342	-5.84928	8.9269e-08	1.73552e-05	7.68298
PLA2G1B	-1.78869	0.522306	-5.84724	9.00511e-08	1.73574e-05	7.67472
MYO1C	-2.14255	7.1554	-5.84693	9.01718e-08	1.73574e-05	7.67345
NCAPG2	2.29917	7.36452	5.84576	9.06233e-08	1.73574e-05	7.66872
RP11-415D17.4	-2.2447	0.69752	-5.84572	9.06385e-08	1.73574e-05	7.66856
TMBIM1	-2.16618	5.91565	-5.83604	9.44757e-08	1.80248e-05	7.62931
FMO2	-4.29901	4.05462	-5.83106	9.65121e-08	1.83448e-05	7.60913
RP3-510L9.1	-3.81437	2.61924	-5.82902	9.73604e-08	1.84375e-05	7.60084
RP11-806O11.1	-3.1688	1.58692	-5.82179	1.00418e-07	1.89464e-05	7.57157
ESAM	-3.58969	4.30602	-5.82002	1.0118e-07	1.90199e-05	7.56442
RP11-288D9.1	-1.88747	0.445566	-5.8147	1.03509e-07	1.93865e-05	7.54288
NDST1	-1.60335	7.66246	-5.81339	1.04093e-07	1.94246e-05	7.53756
RBMS2	-2.41949	5.82658	-5.81215	1.04644e-07	1.94565e-05	7.53256
ITPKC	-3.55549	5.33884	-5.80791	1.06555e-07	1.97402e-05	7.51542
OSCAR	-3.34335	1.69052	-5.80079	1.09849e-07	2.02768e-05	7.48662
RRM2	2.70288	6.585	5.78609	1.16963e-07	2.14353e-05	7.42723
KNTC1	1.66718	8.33736	5.7739	1.23209e-07	2.24964e-05	7.37799
RP11-81F11.3	-1.71098	0.63117	-5.77309	1.23633e-07	2.24964e-05	7.37474
AQP1	-3.41303	5.43738	-5.77045	1.25034e-07	2.26707e-05	7.36408
JDP2	-2.7571	4.68844	-5.75602	1.32964e-07	2.39387e-05	7.30589
CEP78	1.84352	7.05107	5.74577	1.38893e-07	2.49184e-05	7.26461
CDKN2A	2.44193	6.7774	5.74339	1.40308e-07	2.50733e-05	7.25502
RP11-298K24.2	-1.54008	0.538921	-5.74267	1.40738e-07	2.50733e-05	7.25213
RRAS	-3.70673	3.49493	-5.74118	1.41631e-07	2.5145e-05	7.24614
STEAP4	-3.48064	4.66477	-5.73887	1.43034e-07	2.53061e-05	7.23682
KCNG3	3.40314	3.62859	5.73665	1.44386e-07	2.54572e-05	7.22792
WWC2	-2.87587	5.28646	-5.73533	1.45203e-07	2.55134e-05	7.22258
AC107072.2	-2.75948	1.5222	-5.73437	1.45793e-07	2.55293e-05	7.21874
BCYRN1	1.86025	7.83748	5.73016	1.48427e-07	2.59018e-05	7.2018
CRISPLD2	-2.41889	6.4975	-5.729	1.49163e-07	2.59417e-05	7.19712
AC008537.2	-4.70683	3.31856	-5.72453	1.5202e-07	2.6349e-05	7.17917
MMP19	-3.2966	5.93001	-5.72208	1.53613e-07	2.65351e-05	7.16931
ALOX5AP	-3.24168	1.50409	-5.71961	1.55236e-07	2.67251e-05	7.15937
TMEM2	-2.09473	6.87599	-5.71847	1.55986e-07	2.67642e-05	7.15481
SERPING1	-3.32718	6.25614	-5.71765	1.56535e-07	2.67685e-05	7.15149
NPC2	-2.54605	4.61423	-5.71534	1.58077e-07	2.69422e-05	7.14221
RP11-120K18.3	-3.29105	1.27393	-5.71141	1.60735e-07	2.73041e-05	7.12644
C10orf10	-3.13336	7.14032	-5.70769	1.63297e-07	2.76475e-05	7.11148
ZNF331	-1.72532	6.46685	-5.70428	1.65676e-07	2.79577e-05	7.0978
BAI2	3.45111	5.75927	5.70151	1.67637e-07	2.81955e-05	7.08667
LAMB1	-2.04615	7.3142	-5.69031	1.7579e-07	2.94699e-05	7.04175
LRP10	-1.73585	6.48615	-5.68796	1.77548e-07	2.96674e-05	7.03233
ADAMTSL4	-2.45215	6.44859	-5.6859	1.79106e-07	2.98302e-05	7.02407
LRRN4	-3.50792	1.88125	-5.68034	1.83375e-07	3.04249e-05	7.00179
AC013480.2	-1.20034	0.368307	-5.67971	1.83867e-07	3.04249e-05	6.99926
GS1-115G20.2	-2.88332	1.49123	-5.67756	1.85552e-07	3.05672e-05	6.99063
AHNAK	-3.28327	9.29803	-5.67709	1.85922e-07	3.05672e-05	6.98874
ATOH8	-3.59837	3.93236	-5.67627	1.86564e-07	3.05743e-05	6.98548
KCNJ15	-3.94522	3.32852	-5.67111	1.90689e-07	3.11505e-05	6.9648
KLF6	-2.37021	8.01667	-5.67024	1.91391e-07	3.11656e-05	6.96133
SERPINA1	-4.0986	4.87051	-5.6678	1.93378e-07	3.13893e-05	6.95155
MRPS21P9	-1.82178	0.489285	-5.66535	1.95392e-07	3.16158e-05	6.94175
NTN4	-3.61811	4.04014	-5.65747	2.02017e-07	3.25846e-05	6.91022
TNXB	-3.7574	5.95594	-5.65517	2.03997e-07	3.28005e-05	6.901
CDHR2	3.51384	5.61544	5.65357	2.05383e-07	3.29198e-05	6.8946
PRF1	-3.63376	2.58528	-5.64984	2.08643e-07	3.33378e-05	6.8797
RP5-1142A6.7	-3.61542	2.0379	-5.64904	2.09349e-07	3.33465e-05	6.87651
TPSB2	-4.10474	1.70874	-5.64554	2.12472e-07	3.36728e-05	6.8625
SYNPO	-2.52589	6.78007	-5.64527	2.12715e-07	3.36728e-05	6.86143
SLCO2A1	-4.06035	5.08329	-5.6437	2.14131e-07	3.37924e-05	6.85515
TRIM9	4.05371	6.6646	5.64177	2.15883e-07	3.39641e-05	6.84744
VIPR1	-3.53811	5.24587	-5.63585	2.21348e-07	3.45701e-05	6.82381
CX3CL1	-3.8179	4.13503	-5.63549	2.21686e-07	3.45701e-05	6.82236
CTD-2531D15.4	-4.66841	1.89792	-5.63541	2.21764e-07	3.45701e-05	6.82203
MIR4257	-1.47264	0.467502	-5.63313	2.23911e-07	3.47987e-05	6.81292
PIEZO1	-2.4485	7.07118	-5.61796	2.38708e-07	3.69859e-05	6.75242
ZNF557	1.74513	5.60471	5.61255	2.44225e-07	3.77265e-05	6.73081
ENG	-2.42111	5.89867	-5.61168	2.45123e-07	3.77511e-05	6.72734
F2RL3	-3.53633	2.74344	-5.60835	2.48581e-07	3.81688e-05	6.7141
SOX17	-2.06342	0.722936	-5.6049	2.52229e-07	3.85717e-05	6.70032
RP11-327L3.1	-2.90294	1.26882	-5.60444	2.52714e-07	3.85717e-05	6.69851
EDNRB	-3.77947	3.19989	-5.6029	2.5436e-07	3.87073e-05	6.69237
CDKN2C	3.26802	6.5145	5.60111	2.5628e-07	3.87752e-05	6.68526
WHSC1	1.55558	9.45893	5.60108	2.56323e-07	3.87752e-05	6.6851
LMO7	-1.92058	7.74855	-5.59574	2.62149e-07	3.95396e-05	6.66386
CAT	-2.53695	4.65661	-5.59401	2.64067e-07	3.97118e-05	6.65696
LMNB2	2.01975	7.8787	5.59257	2.65666e-07	3.98351e-05	6.65126
BRSK1	2.7229	5.47787	5.5915	2.66872e-07	3.9899e-05	6.64697
CASS4	-3.75415	2.49205	-5.5886	2.70149e-07	4.02711e-05	6.63544
ITGB6	-3.69046	3.46585	-5.57686	2.83822e-07	4.21863e-05	6.58877
RPS6KA2	-1.71298	6.68648	-5.57588	2.84996e-07	4.22036e-05	6.58486
RNU6-50	-1.08	0.265282	-5.57539	2.85589e-07	4.22036e-05	6.5829
DUSP1	-3.58421	6.74474	-5.57411	2.87127e-07	4.22611e-05	6.57782
TJP1	-1.76302	7.85297	-5.57369	2.87631e-07	4.22611e-05	6.57616
UTRN	-2.42296	8.20596	-5.57126	2.90587e-07	4.2573e-05	6.5665
PPHLN1	1.06294	7.11672	5.57014	2.91967e-07	4.2653e-05	6.56202
SHANK3	-2.71164	6.88508	-5.56886	2.9353e-07	4.27593e-05	6.55697
TMPO	1.74113	8.42023	5.56168	3.02526e-07	4.35732e-05	6.52844
ZFP36	-3.59859	7.65165	-5.55267	3.14199e-07	4.51272e-05	6.49266
RP11-566K11.2	3.88131	3.90816	5.55062	3.16908e-07	4.53888e-05	6.48455
PPP1R15A	-2.10935	6.73811	-5.54574	3.23472e-07	4.61995e-05	6.46517
SOX4	1.94963	9.26281	5.54497	3.24507e-07	4.62182e-05	6.46216
AC010890.1	-2.86369	1.29629	-5.5424	3.28029e-07	4.64626e-05	6.45195
XPO5	1.10874	7.2817	5.54239	3.2804e-07	4.64626e-05	6.45192
CTA-363E6.5	-1.84833	0.535487	-5.53257	3.4183e-07	4.8282e-05	6.41301
SLC1A4	1.71705	6.79139	5.52733	3.49421e-07	4.92183e-05	6.39225
CAMSAP1	1.33192	7.94453	5.52373	3.54727e-07	4.98284e-05	6.37801
CTD-2562J17.7	-2.99178	1.54803	-5.52044	3.59655e-07	5.00832e-05	6.36498
FZD3	1.87087	6.54608	5.5204	3.59714e-07	5.00832e-05	6.36482
ALOX15B	-4.53672	2.85089	-5.52023	3.59969e-07	5.00832e-05	6.36415
YAP1	-2.72372	5.2401	-5.51991	3.60459e-07	5.00832e-05	6.36287
ACSL1	-2.07346	6.18357	-5.51845	3.6267e-07	5.02279e-05	6.35709
IL18R1	-3.56711	2.66497	-5.51792	3.63465e-07	5.02279e-05	6.35502
MAPK8IP2	2.63329	5.93987	5.51698	3.64912e-07	5.02919e-05	6.35126
TNS1	-3.08334	8.53914	-5.51109	3.74011e-07	5.12696e-05	6.32799
DRAM1	-3.19302	3.59093	-5.50945	3.76589e-07	5.14849e-05	6.3215
ROS1	-4.98143	3.68881	-5.50848	3.78124e-07	5.15569e-05	6.31766
SOCS3	-3.47632	5.58865	-5.50648	3.813e-07	5.18518e-05	6.30975
HEG1	-2.79606	6.80134	-5.50476	3.84049e-07	5.2087e-05	6.30297
RP11-111E14.1	-3.3405	1.94421	-5.50356	3.85986e-07	5.22112e-05	6.29822
CTD-3064M3.3	-2.88013	1.33762	-5.50086	3.90372e-07	5.25913e-05	6.28754
PPP1R3E	2.00034	6.6854	5.50056	3.90853e-07	5.25913e-05	6.28638
MAOA	-4.15884	3.42659	-5.49923	3.9303e-07	5.27454e-05	6.28113
MOCS1	-1.8271	5.68675	-5.49441	4.01036e-07	5.35588e-05	6.26208
FOXRED1	1.83685	6.31061	5.49432	4.01186e-07	5.35588e-05	6.26173
LIMS2	-3.65622	4.85962	-5.49095	4.06883e-07	5.41779e-05	6.2484
HELLS	2.47598	7.63578	5.48632	4.14822e-07	5.49489e-05	6.23015
GS1-600G8.5	-1.33087	0.439606	-5.48387	4.19089e-07	5.5201e-05	6.22048
SRRM4	3.59736	6.22574	5.48387	4.19097e-07	5.5201e-05	6.22046
MCM4	2.05208	7.64293	5.48265	4.21237e-07	5.52264e-05	6.21565
TGM2	-3.1916	6.60401	-5.48116	4.23855e-07	5.54275e-05	6.2098
BLVRB	-2.94387	1.5229	-5.47889	4.27894e-07	5.56738e-05	6.20084
RP11-565H13.3	-1.36158	0.315318	-5.47888	4.27916e-07	5.56738e-05	6.20079
MYADM	-3.04423	6.69797	-5.47665	4.3191e-07	5.60421e-05	6.19201
RP11-588H23.3	-3.79954	2.69254	-5.47577	4.33501e-07	5.60421e-05	6.18854
CSF3R	-3.67622	5.43372	-5.47548	4.34036e-07	5.60421e-05	6.18738
ALDH2	-3.30916	3.31578	-5.47197	4.40441e-07	5.66898e-05	6.17354
RP11-183M13.1	-3.64952	1.90267	-5.47152	4.41269e-07	5.66898e-05	6.17176
C15orf42	2.31676	6.29807	5.47084	4.42509e-07	5.67066e-05	6.16911
PTPRM	-2.545	7.0943	-5.46799	4.47804e-07	5.69905e-05	6.15788
AC005682.6	-2.04907	0.859311	-5.46785	4.48068e-07	5.69905e-05	6.15732
STMN1	2.97705	8.80144	5.45944	4.64059e-07	5.87829e-05	6.1242
LRRC32	-3.21855	4.84341	-5.45923	4.6446e-07	5.87829e-05	6.12338
CPT1C	2.68692	5.77366	5.45477	4.73179e-07	5.97386e-05	6.10582
TACC3	2.06563	6.70484	5.45299	4.76711e-07	6.00362e-05	6.09879
FBLN5	-3.89979	4.03485	-5.45116	4.80346e-07	6.03454e-05	6.09162
RP11-16M8.2	-2.99227	1.49528	-5.44577	4.91265e-07	6.15658e-05	6.07039
PTPN21	-2.22931	5.3875	-5.43945	5.04351e-07	6.30513e-05	6.04556
SDC4	-2.83711	5.74225	-5.43857	5.06209e-07	6.31292e-05	6.04209
DUOXA1	-3.85758	4.26977	-5.43625	5.11105e-07	6.34504e-05	6.033
HRCT1	-1.14352	0.362382	-5.43618	5.11266e-07	6.34504e-05	6.0327
PTRF	-3.19004	5.87906	-5.43011	5.24328e-07	6.49138e-05	6.00888
WWC3	-1.06705	6.94105	-5.42841	5.28065e-07	6.52186e-05	6.00217
CLIC5	-3.83765	4.36147	-5.42591	5.33567e-07	6.57393e-05	5.99239
RAP1AP	-2.13765	0.857254	-5.42287	5.40373e-07	6.62585e-05	5.98042
ZNF713	2.07271	5.89295	5.41884	5.49483e-07	6.72143e-05	5.96463
WNK2	2.70216	8.17601	5.41527	5.57709e-07	6.80579e-05	5.9506
RP11-729I10.2	-2.09827	0.851176	-5.41238	5.6444e-07	6.8552e-05	5.93927
VEGFC	-2.82906	1.62182	-5.41099	5.67707e-07	6.87854e-05	5.93382
CD97	-3.67045	4.8802	-5.40896	5.72508e-07	6.92031e-05	5.92587
SERPINB6	-2.44554	5.21712	-5.40775	5.75398e-07	6.93884e-05	5.92112
FOS	-3.18626	7.58763	-5.40567	5.80385e-07	6.98251e-05	5.91297
GPT2	2.06408	7.06552	5.40206	5.89133e-07	7.07112e-05	5.89884
FXYD1	-2.88692	1.14449	-5.39959	5.95201e-07	7.12722e-05	5.88917
TIMP3	-3.27857	7.57359	-5.38235	6.3932e-07	7.61259e-05	5.82166
CELF4	3.51975	6.08205	5.38231	6.3941e-07	7.61259e-05	5.82153
GPX3	-3.39071	6.30797	-5.38201	6.40201e-07	7.61259e-05	5.82036
PTH1R	-3.03771	1.69982	-5.38039	6.44533e-07	7.64632e-05	5.814
SLC6A17	4.30026	4.88469	5.37663	6.54634e-07	7.74817e-05	5.79932
HIST1H3I	3.29339	5.02169	5.36925	6.7494e-07	7.97006e-05	5.77048
RP11-483E23.8	3.63721	5.05192	5.36799	6.78474e-07	7.98138e-05	5.76555
ITIH4-AS1	-1.9773	0.740474	-5.36757	6.79649e-07	7.98138e-05	5.76392
KCNH7	4.17984	5.25626	5.36669	6.82128e-07	7.98138e-05	5.76049
MFAP4	-3.99077	5.53448	-5.36669	6.82142e-07	7.98138e-05	5.76047
RP11-744I24.1	2.40082	7.5653	5.36236	6.9445e-07	8.10683e-05	5.74359
SLC46A2	-3.07787	1.84768	-5.36113	6.98e-07	8.12971e-05	5.73877
MAP3K8	-3.60952	3.43516	-5.3594	7.03022e-07	8.1696e-05	5.73201
MMS22L	1.46359	7.49379	5.35789	7.07429e-07	8.20216e-05	5.72611
TNKS1BP1	-1.43811	7.34362	-5.35377	7.19583e-07	8.30542e-05	5.71003
MT1M	-2.64645	0.969298	-5.34983	7.31379e-07	8.40362e-05	5.69469
SH3D19	-2.87829	5.83961	-5.34101	7.58526e-07	8.67656e-05	5.66029
NASP	1.18735	8.96125	5.3388	7.65485e-07	8.73661e-05	5.65167
GCNT4	-2.14582	1.03399	-5.33331	7.83036e-07	8.91702e-05	5.63028
FOXF2	-2.84022	1.38148	-5.32863	7.98302e-07	9.07067e-05	5.61206
ALPL	-4.55734	3.97357	-5.32389	8.14042e-07	9.229e-05	5.59364
PTGDS	-4.40279	3.35167	-5.32249	8.18757e-07	9.26191e-05	5.58819
CCL2	-3.59884	2.24479	-5.31721	8.36771e-07	9.4448e-05	5.56765
ABCA1	-1.75915	7.04881	-5.31377	8.48734e-07	9.55873e-05	5.55426
TLN1	-1.23159	8.96487	-5.31204	8.54788e-07	9.60575e-05	5.54755
CPAMD8	-3.95356	3.87392	-5.30627	8.75345e-07	9.81519e-05	5.52513
SPRY4	-2.5653	6.10526	-5.30537	8.7861e-07	9.83024e-05	5.52162
GZMH	-2.37835	1.08455	-5.30126	8.93597e-07	9.9761e-05	5.50566
ECEL1P2	-1.97289	0.766797	-5.29684	9.09978e-07	0.000101368	5.48852
ARHGAP6	-3.71402	2.90775	-5.2907	9.33254e-07	0.000103735	5.4647
KLF9	-3.16012	5.58917	-5.28772	9.44772e-07	0.000104673	5.45313
ZBTB16	-3.58188	6.56413	-5.28746	9.45781e-07	0.000104673	5.45212
FADS2	1.72903	7.90374	5.28684	9.48185e-07	0.000104712	5.44973
CDC20	3.2471	4.89736	5.28382	9.60014e-07	0.00010579	5.43803
PTGS2	-4.27673	2.84877	-5.27985	9.75801e-07	0.000107298	5.42265
AC058791.2	-2.65806	5.86917	-5.27884	9.79859e-07	0.000107484	5.41873
RFC2	2.33084	5.19717	5.27839	9.81694e-07	0.000107484	5.41697
UNC13D	-3.11905	4.5931	-5.27741	9.8566e-07	0.000107688	5.41316
RP11-483L5.1	-2.63213	1.45343	-5.27642	9.89651e-07	0.000107893	5.40935
GPR17	-3.76677	2.27048	-5.2683	1.02319e-06	0.000111076	5.37792
GNG11	-3.03513	1.44097	-5.26508	1.03681e-06	0.000112315	5.36545
CYS1	-2.36502	0.997284	-5.2642	1.04058e-06	0.000112486	5.36202
FSTL3	-3.31645	3.86081	-5.2596	1.0604e-06	0.000114387	5.34422
CEP97	1.89217	6.72584	5.25594	1.07645e-06	0.000115873	5.33006
RP3-462E2.3	-2.07619	0.799698	-5.25396	1.08519e-06	0.000116569	5.32243
SLC6A4	-3.50892	4.11736	-5.25134	1.09693e-06	0.000117583	5.31229
RAD54L	2.4813	6.24423	5.2483	1.11066e-06	0.000118806	5.30056
KLF15	-3.45234	2.79087	-5.24408	1.13002e-06	0.00012042	5.28426
RP11-61I13.3	-2.91239	1.65248	-5.24399	1.13046e-06	0.00012042	5.28389
ATP13A4	-3.49807	4.71179	-5.24271	1.1364e-06	0.000120801	5.27895
CAV2	-3.59182	3.78001	-5.24092	1.14475e-06	0.000121436	5.27205
CPB2	-2.60566	1.33804	-5.23971	1.15043e-06	0.000121786	5.26738
CDK5R1	2.29017	5.99263	5.23793	1.15884e-06	0.000122358	5.26051
RP11-597M12.1	-2.90755	1.6309	-5.23719	1.16234e-06	0.000122358	5.25767
SYT11	2.36313	7.06376	5.23705	1.16301e-06	0.000122358	5.25712
TNFAIP3	-2.87367	6.26671	-5.23509	1.17242e-06	0.000122736	5.24953
IL6	-3.74592	1.7949	-5.235	1.17281e-06	0.000122736	5.24921
IQGAP3	2.51372	7.76632	5.2348	1.17381e-06	0.000122736	5.24841
MIR22HG	-3.54852	3.46722	-5.23425	1.17646e-06	0.000122762	5.24629
C2orf48	3.4023	3.63912	5.23346	1.18026e-06	0.000122908	5.24324
CHAF1A	1.75552	7.35464	5.23237	1.18553e-06	0.000123206	5.23904
POU5F1	1.46943	6.63105	5.23144	1.19002e-06	0.000123422	5.23547
MARCKSL1	3.01609	8.16845	5.22337	1.22995e-06	0.000127304	5.20436
P2RY2	-2.92669	1.57272	-5.21959	1.24915e-06	0.000129031	5.18976
DTX1	3.072	5.26719	5.21779	1.25835e-06	0.000129719	5.18284
TEK	-3.81132	3.01405	-5.21615	1.26681e-06	0.000130329	5.17652
FLT4	-2.80169	5.15322	-5.2063	1.31881e-06	0.000135405	5.1386
SLC11A1	-3.85977	4.83936	-5.20448	1.32865e-06	0.000136143	5.13158
CLEC1A	-3.51254	2.00863	-5.20383	1.33219e-06	0.000136232	5.12908
NDNF	-4.1224	3.06708	-5.20122	1.34641e-06	0.000137412	5.11907
MRTO4	2.19234	4.93142	5.19994	1.35348e-06	0.000137859	5.11413
FOSL2	-2.04431	7.41937	-5.19821	1.36306e-06	0.000138558	5.10749
SIX1	3.38344	5.48582	5.19604	1.37519e-06	0.000139513	5.09914
BUB1	3.07749	6.06249	5.19461	1.38323e-06	0.000140038	5.09364
SEPT3	3.13587	6.9884	5.19415	1.38583e-06	0.000140038	5.09187
TAX1BP3	-1.68035	0.659683	-5.19104	1.40353e-06	0.000141517	5.0799
RP11-550I15.1	-1.24918	0.407169	-5.19061	1.406e-06	0.000141517	5.07825
CYBRD1	-3.31475	5.01813	-5.18936	1.41318e-06	0.000141701	5.07345
HDAC2	1.471	7.91304	5.18916	1.4143e-06	0.000141701	5.0727
RP11-64D24.2	-2.82586	1.18559	-5.18884	1.41615e-06	0.000141701	5.07147
RP11-336K24.5	-1.64742	0.628454	-5.17633	1.49018e-06	0.000148817	5.02344
RP11-137L10.5	-1.87872	0.744001	-5.16805	1.54129e-06	0.00015307	4.99167
DHDDS	1.27949	7.57474	5.16756	1.54438e-06	0.00015307	4.98978
GNG4	3.25924	7.54509	5.16606	1.55383e-06	0.000153301	4.98403
ALS2CL	-3.4926	4.8695	-5.1657	1.55606e-06	0.000153301	4.98268
ROBO4	-3.42303	4.88665	-5.1646	1.56308e-06	0.000153696	4.97843
DPT	-3.05817	1.98345	-5.16142	1.58342e-06	0.000155397	4.96625
DPY19L2P2	1.70374	6.68702	5.15964	1.59493e-06	0.000156227	4.95943
ABI3BP	-2.94854	6.15208	-5.1579	1.60621e-06	0.000157031	4.95279
RBMS3	-3.00814	4.95864	-5.15665	1.61443e-06	0.000157533	4.94798
OLR1	-3.84904	2.75339	-5.15511	1.62456e-06	0.000158148	4.94208
DOCK6	-2.19758	6.80341	-5.15475	1.62692e-06	0.000158148	4.94072
CACNA2D2	-3.06627	6.37808	-5.14644	1.68275e-06	0.000163033	4.90892
RP11-420K8.1	-3.09066	2.8483	-5.14587	1.68665e-06	0.000163033	4.90674
SLC16A5	-3.56059	2.87157	-5.14586	1.68674e-06	0.000163033	4.90669
CFD	-3.24221	2.28484	-5.14179	1.71483e-06	0.000165436	4.89113
C11orf9	-2.56569	5.8443	-5.14036	1.72483e-06	0.000165569	4.88565
GPR133	-4.18271	4.59819	-5.1402	1.72592e-06	0.000165569	4.88505
C1orf116	-3.06441	5.22217	-5.13918	1.73313e-06	0.000165948	4.88113
SPTBN2	1.82115	8.00923	5.13777	1.74308e-06	0.000166279	4.87573
RP11-288G11.3	-2.23123	1.10933	-5.13459	1.76565e-06	0.000168119	4.86361
CCL4	-3.04455	1.50461	-5.13227	1.78236e-06	0.000169394	4.85474
MALL	-2.87836	4.45562	-5.13095	1.79198e-06	0.000169849	4.84967
ITPRIP	-2.36517	6.06297	-5.1307	1.79379e-06	0.000169849	4.84872
CELSR3	2.9184	8.52227	5.12894	1.80664e-06	0.000170749	4.842
KLF2	-3.75157	3.74417	-5.12654	1.8243e-06	0.0001721	4.83283
RP11-701P16.5	-1.54988	0.477797	-5.12502	1.83554e-06	0.000172832	4.82705
COX4I2	-2.46794	1.15801	-5.12458	1.83881e-06	0.000172832	4.82537
USHBP1	-3.00533	2.06041	-5.11779	1.89011e-06	0.000177327	4.79945
AC011284.3	2.50971	5.01993	5.1141	1.91854e-06	0.000179665	4.78538
GNAI2	-1.19443	7.83872	-5.1125	1.93101e-06	0.000180502	4.77928
GALNTL4	-3.11001	4.32566	-5.11054	1.94641e-06	0.00018161	4.7718
CFLAR	-1.30855	8.49839	-5.10974	1.9527e-06	0.000181613	4.76876
RP11-88L24.2	-2.81249	1.16988	-5.10964	1.95356e-06	0.000181613	4.76835
SYNE1-AS1	-2.99205	1.32585	-5.10885	1.95976e-06	0.000181859	4.76536
ACADL	-3.332	2.38034	-5.1079	1.96736e-06	0.000182234	4.76171
TBX2	-2.79973	5.22937	-5.10423	1.99673e-06	0.00018462	4.74776
CCDC69	-3.09727	4.70416	-5.10057	2.02654e-06	0.000187038	4.7338
NCKAP5	-2.87471	5.25272	-5.0949	2.07348e-06	0.000191026	4.71224
SFTPB	-5.08576	8.22777	-5.09046	2.11107e-06	0.000194139	4.69532
RP11-702H23.6	-2.8195	1.61905	-5.08896	2.12391e-06	0.000194969	4.68961
RFWD3	1.48323	6.76037	5.08275	2.17784e-06	0.000199561	4.666
SGK1	-2.46605	6.27528	-5.07817	2.2185e-06	0.000202923	4.64858
VIPR1-AS1	-2.56533	0.847829	-5.07358	2.25995e-06	0.000205978	4.63115
SKP2	1.80945	6.45022	5.07228	2.27178e-06	0.000206688	4.62623
SRCIN1	2.63441	7.0285	5.0709	2.28453e-06	0.000207354	4.62096
MIR1290	-1.13486	0.209924	-5.06915	2.30062e-06	0.0002082	4.61435
FAM162B	-2.2688	0.778587	-5.06198	2.36808e-06	0.000213926	4.58714
PLLP	-3.10677	2.23569	-5.06056	2.38167e-06	0.000214775	4.58175
SUPT16H	1.17986	8.27505	5.05303	2.45506e-06	0.000221003	4.55319
RP11-249C24.10	-1.69866	0.509018	-5.05247	2.46062e-06	0.000221114	4.55106
CIDEB	1.01997	7.31526	5.05194	2.46587e-06	0.000221197	4.54905
LINC00511	2.54198	5.4969	5.05117	2.47349e-06	0.000221493	4.54614
LILRB2	-3.38014	3.31886	-5.05062	2.47898e-06	0.000221596	4.54406
AC019117.2	-2.79208	1.09803	-5.04383	2.5476e-06	0.000227332	4.51835
RP11-27M24.3	-2.98263	1.38329	-5.04243	2.56202e-06	0.000228221	4.51304
HMGN2	2.04126	9.18974	5.04066	2.58036e-06	0.000229454	4.50633
DNM1	1.86683	7.14157	5.03983	2.58898e-06	0.000229613	4.50319
PXN	-1.53641	7.88209	-5.03962	2.59112e-06	0.000229613	4.50241
TCF19	2.10895	6.82117	5.03835	2.60446e-06	0.000230395	4.49758
RASSF4	-2.41458	6.4132	-5.03743	2.61405e-06	0.000230844	4.49412
IL18RAP	-2.39768	1.37252	-5.03629	2.62612e-06	0.000231511	4.48978
VPS37B	-1.45918	6.57708	-5.03551	2.63437e-06	0.000231838	4.48683
ELN	-2.36454	7.38096	-5.03352	2.65545e-06	0.00023299	4.47933
DOCK4	-1.64252	7.31757	-5.03201	2.67165e-06	0.000233911	4.47361
CSPG4	-2.1652	6.0015	-5.03002	2.69313e-06	0.000235389	4.46607
ANXA3	-3.52966	2.78597	-5.02638	2.7327e-06	0.00023844	4.45234
AC092640.1	-1.193	0.339599	-5.02467	2.75156e-06	0.000239676	4.44587
ITPR1	-2.52319	6.11197	-5.02001	2.80353e-06	0.000243374	4.42826
RP11-111M22.2	1.80382	5.93832	5.01884	2.81677e-06	0.000244109	4.42382
CCDC48	-3.23794	2.34887	-5.01824	2.82355e-06	0.000244282	4.42156
FGD5	-2.89499	4.97405	-5.01707	2.83681e-06	0.000244757	4.41715
CTD-2236F14.1	-2.00872	0.739191	-5.01687	2.8391e-06	0.000244757	4.41639
NPTXR	2.60882	6.83158	5.01549	2.85488e-06	0.000245332	4.41118
RP11-35J10.4	-1.1585	0.307887	-5.01091	2.90776e-06	0.000249457	4.39391
HLA-E	-3.25213	7.17122	-5.01033	2.91454e-06	0.00024962	4.39172
KIAA1274	-2.45169	5.30143	-5.00497	2.97789e-06	0.000254619	4.37148
ADD2	2.42266	7.99662	5.00368	2.99323e-06	0.000255504	4.36665
RBPMS	-2.27508	6.33298	-5.0029	3.00269e-06	0.000255884	4.36368
CD55	-3.36132	5.58586	-5.00228	3.01012e-06	0.000256091	4.36135
CRIM1	-2.62736	5.75621	-5.00112	3.02417e-06	0.000256858	4.35697
RP11-227F19.5	-2.10072	0.8909	-4.99906	3.04915e-06	0.000258551	4.34923
AGBL1	-3.52831	2.38662	-4.99757	3.06745e-06	0.000259672	4.3436
SEMA3G	-3.25929	2.91753	-4.99578	3.08954e-06	0.000260679	4.33685
AC006159.5	-2.68264	1.07599	-4.99518	3.09693e-06	0.000260693	4.3346
RRAD	-3.23968	1.7718	-4.99494	3.09991e-06	0.000260693	4.3337
PROX1	1.99264	8.57003	4.99411	3.1103e-06	0.000261138	4.33055
CSF1	-2.90573	4.8639	-4.99299	3.12425e-06	0.000261879	4.32634
RP11-336K24.6	-1.5053	0.430497	-4.98726	3.19665e-06	0.000267509	4.30479
G0S2	-3.02631	1.51463	-4.98533	3.22147e-06	0.000268698	4.29751
VENTX	-2.53408	1.2962	-4.98493	3.22662e-06	0.000268698	4.29601
TMEM125	-3.4789	3.09727	-4.98272	3.25531e-06	0.000270646	4.28768
FBP1	-3.25206	2.70478	-4.9814	3.27245e-06	0.000271629	4.28274
RHOB	-2.72433	6.77199	-4.98029	3.28707e-06	0.0002724	4.27855
HES6	3.82525	5.38723	4.97536	3.35247e-06	0.000277371	4.26001
RND2	2.63569	3.71465	4.97464	3.3622e-06	0.000277727	4.25729
ARHGEF15	-3.60536	3.72557	-4.97367	3.37521e-06	0.000278352	4.25365
VSIG2	-3.33672	2.39504	-4.97305	3.38354e-06	0.000278589	4.25133
CRY2	-1.48212	6.12127	-4.97144	3.40541e-06	0.000279939	4.24527
TREM1	-2.94436	1.58345	-4.96605	3.47956e-06	0.000284883	4.22501
AP001626.1	-3.27641	1.13025	-4.9659	3.48166e-06	0.000284883	4.22445
CHRNB2	2.20984	6.49452	4.96202	3.53601e-06	0.000287844	4.20988
PKMYT1	2.92853	6.47864	4.96166	3.54098e-06	0.000287844	4.20856
TLR2	-3.51541	3.08219	-4.95934	3.57402e-06	0.000290069	4.19982
STARD13-AS2	-2.99759	1.6729	-4.95862	3.58424e-06	0.00029034	4.19714
LAMB2	-2.77817	6.25069	-4.95831	3.58871e-06	0.00029034	4.19596
VWFP1	-3.1531	1.54648	-4.95658	3.61348e-06	0.000291881	4.18949
AC003075.4	-2.215	1.0885	-4.95387	3.65277e-06	0.00029459	4.17932
AP001189.4	-3.44349	2.31343	-4.95311	3.66391e-06	0.000295022	4.17646
AC097461.2	-2.27303	1.09728	-4.95181	3.68291e-06	0.000296086	4.1716
RP11-399O19.8	-2.33924	1.07842	-4.94818	3.73668e-06	0.000299532	4.15796
KIF2C	2.78335	5.91326	4.94812	3.73748e-06	0.000299532	4.15776
DPP4	-3.01945	2.93042	-4.94761	3.74518e-06	0.000299679	4.15583
CELF3	4.14586	5.84034	4.94684	3.7566e-06	0.000300123	4.15297
ABCA6	-3.67015	4.0311	-4.9459	3.77069e-06	0.000300216	4.14945
TNFRSF10D	-3.29621	2.92302	-4.94563	3.77481e-06	0.000300216	4.14842
IL6R	-3.61322	3.94758	-4.94559	3.77538e-06	0.000300216	4.14828
AC007271.3	-1.77334	0.631739	-4.94328	3.81036e-06	0.000302527	4.1396
PAXIP1	1.24317	6.85635	4.9424	3.8237e-06	0.000302728	4.13632
SV2A	2.24061	6.60594	4.94231	3.82503e-06	0.000302728	4.13599
ADAMTS1	-2.83031	5.50744	-4.94194	3.83064e-06	0.000302728	4.13461
SCARF1	-3.1446	3.12491	-4.9391	3.87431e-06	0.000305706	4.12395
RP11-307B6.3	-3.08545	1.80947	-4.93693	3.90782e-06	0.000307579	4.11585
ZNF250	1.34998	6.59218	4.93679	3.91008e-06	0.000307579	4.11531
THBD	-3.63656	3.14463	-4.9339	3.95525e-06	0.000310654	4.10451
TSC22D3	-2.57412	6.79246	-4.93137	3.99532e-06	0.00031332	4.09503
AHR	-2.7957	5.80754	-4.93027	4.01279e-06	0.000314208	4.09093
RP11-54A4.2	-3.19126	4.2989	-4.9285	4.04117e-06	0.000315946	4.08431
RP11-736K20.5	-2.48209	1.54231	-4.92647	4.07406e-06	0.000318032	4.07668
ANXA11	-1.63671	7.07826	-4.92307	4.12946e-06	0.000321865	4.06399
ZNF417	1.65107	6.25049	4.92125	4.15948e-06	0.000323711	4.05718
TLR3	-2.71821	1.76071	-4.92014	4.17784e-06	0.000324646	4.05303
HYAL1	-2.79984	3.43333	-4.91926	4.19241e-06	0.000325284	4.04976
USP54	-1.2942	7.48695	-4.91845	4.20596e-06	0.000325841	4.04673
SPIRE2	1.56495	7.06045	4.91584	4.24988e-06	0.000328745	4.03696
HN1	2.31683	6.09558	4.91483	4.26694e-06	0.000329567	4.0332
SAPCD2	3.10659	6.02491	4.90775	4.38853e-06	0.000337	4.00678
C16orf89	-1.61362	0.600634	-4.90769	4.38955e-06	0.000337	4.00656
ARRB1	-2.84674	5.43513	-4.90696	4.40242e-06	0.000337481	4.00381
PLEKHG4B	2.20322	8.42488	4.90377	4.45848e-06	0.000341267	3.99192
FGR	-3.09718	3.70178	-4.89921	4.53979e-06	0.000346453	3.97493
SELENBP1	-3.22469	5.16074	-4.89826	4.557e-06	0.000347249	3.97138
SRRM3	2.98846	6.46286	4.89719	4.57628e-06	0.000347345	3.96741
EGFR	-1.9944	6.85094	-4.89587	4.60037e-06	0.000347859	3.96247
HP1BP3	1.11864	8.97225	4.89537	4.60946e-06	0.000347859	3.96062
ZYX	-2.4756	6.45303	-4.89535	4.60988e-06	0.000347859	3.96053
SASH1	-2.67299	5.78091	-4.89515	4.61347e-06	0.000347859	3.9598
MSI1	2.61575	6.19291	4.89483	4.61943e-06	0.000347859	3.95859
RIN3	-2.18777	5.63646	-4.89307	4.65165e-06	0.00034977	3.95205
KCNJ8	-2.79401	2.17043	-4.89141	4.68253e-06	0.000351575	3.94584
HLA-DMA	-2.71561	4.73927	-4.89059	4.69768e-06	0.000351679	3.9428
IL7R	-3.15529	5.55854	-4.88793	4.74755e-06	0.000354893	3.93288
CLDN5	-3.13814	3.50451	-4.88705	4.76411e-06	0.000355611	3.9296
AC098650.1	-1.79412	0.608904	-4.88507	4.80155e-06	0.000357883	3.92225
ITGA3	-1.58949	7.49108	-4.88338	4.83373e-06	0.000359757	3.91597
APLP2	-1.07755	8.40346	-4.88052	4.88891e-06	0.000363335	3.9053
MFI2-AS1	3.326	4.22024	4.88002	4.89854e-06	0.000363467	3.90345
KLF4	-3.30902	5.06365	-4.87932	4.91215e-06	0.000363467	3.90085
GOLGA2B	1.81464	7.11546	4.87926	4.91331e-06	0.000363467	3.90062
SOCS2	-3.35706	3.83084	-4.87896	4.91911e-06	0.000363467	3.89952
CCND3	-1.67822	5.86392	-4.87638	4.96968e-06	0.000366673	3.88991
CTD-2288O8.1	-1.96145	0.900133	-4.87043	5.08801e-06	0.000374863	3.86779
DUSP3	-1.86188	5.75397	-4.86606	5.17667e-06	0.000380846	3.85156
KRT16P2	-2.85925	1.0254	-4.86523	5.1936e-06	0.000381241	3.84849
WFS1	-2.36948	5.05011	-4.86498	5.19873e-06	0.000381241	3.84757
CAMK2N2	3.62551	4.71713	4.86454	5.20781e-06	0.000381241	3.84593
RCC2	1.67815	8.49052	4.86435	5.21186e-06	0.000381241	3.8452
HLA-DPA1	-2.95105	5.37537	-4.86061	5.28929e-06	0.000386353	3.83134
LDB2	-3.26686	4.64322	-4.85939	5.31505e-06	0.00038768	3.82678
F3	-3.36344	3.84102	-4.85615	5.38342e-06	0.000392108	3.81477
RP11-627G18.1	-2.35633	1.11751	-4.85315	5.44765e-06	0.000396222	3.80363
USH1C	3.66171	4.54469	4.84953	5.52586e-06	0.000401339	3.79024
AC109642.1	-1.84765	0.857156	-4.841	5.71509e-06	0.000413982	3.75861
RALGPS1	1.34761	7.28162	4.84095	5.71613e-06	0.000413982	3.75844
MTUS1	-1.72542	7.17613	-4.83785	5.78641e-06	0.00041848	3.74696
EMP1	-3.53109	5.83923	-4.83071	5.95163e-06	0.00042833	3.72052
FAM46B	-3.12661	2.00545	-4.83069	5.95196e-06	0.00042833	3.72046
PDK4	-3.13214	6.06658	-4.83021	5.9633e-06	0.00042833	3.71868
CTC-558O2.1	-3.11168	2.34357	-4.83016	5.9645e-06	0.00042833	3.71849
ZBTB4	-1.55926	7.32181	-4.82967	5.97591e-06	0.000428548	3.71669
CBFA2T2	1.61162	9.50385	4.82865	6.00008e-06	0.000429678	3.7129
EDEM1	-1.74945	6.00952	-4.82692	6.04107e-06	0.000431405	3.70651
IL32	-3.41933	4.00619	-4.82567	6.07086e-06	0.000432928	3.70189
IMPDH1P10	-2.22138	6.08649	-4.82465	6.0954e-06	0.000434072	3.6981
MSRB3	-2.22683	4.68417	-4.82225	6.15307e-06	0.000437569	3.68926
DMBT1	-4.44722	4.9429	-4.82082	6.18794e-06	0.000438912	3.68395
EGR1	-2.92893	7.87849	-4.82077	6.18911e-06	0.000438912	3.68377
COL4A4	-2.3207	5.39729	-4.81934	6.22407e-06	0.000440779	3.67848
SYN1	2.58599	4.94037	4.81879	6.2374e-06	0.000441113	3.67647
DOCK9	-1.85913	7.59687	-4.81777	6.26261e-06	0.000441342	3.67268
RNF144B	-2.82301	4.59062	-4.81761	6.26653e-06	0.000441342	3.6721
OR5E1P	-2.30247	0.897123	-4.81612	6.30326e-06	0.000442709	3.66661
RASL12	-3.36102	2.38275	-4.81461	6.34079e-06	0.000444733	3.66103
TMEM100	-3.43733	2.1806	-4.80824	6.50162e-06	0.00045539	3.63751
MAP4	-1.18909	8.36072	-4.80767	6.51617e-06	0.000455784	3.63542
UBTD1	-2.68054	1.42506	-4.80716	6.52931e-06	0.000455846	3.63352
BMP1	-2.19013	5.89017	-4.80694	6.53488e-06	0.000455846	3.63272
RP11-815J21.3	-2.99388	1.57667	-4.80643	6.5481e-06	0.000456146	3.63083
RP11-79H23.3	-3.28067	2.09445	-4.80568	6.56732e-06	0.000456862	3.62807
PARP1	1.36975	7.90409	4.80404	6.60973e-06	0.000459188	3.62203
ERGIC1	-1.16452	7.48955	-4.80325	6.63039e-06	0.000459998	3.6191
HSPB8	-3.1772	2.84516	-4.80239	6.65285e-06	0.00046093	3.61593
PRAM1	-3.03196	2.35169	-4.79943	6.73066e-06	0.000465061	3.60501
BTNL3	-2.51084	1.02759	-4.79717	6.79052e-06	0.000466401	3.59669
FOXM1	2.03923	7.30581	4.79712	6.79192e-06	0.000466401	3.5965
BAIAP2	-2.08764	6.44585	-4.797	6.7951e-06	0.000466401	3.59606
PDGFRA	-3.36946	4.28766	-4.79698	6.79566e-06	0.000466401	3.59599
SGK196	2.09482	5.70792	4.79537	6.83861e-06	0.000468156	3.59007
ZDHHC22	3.83454	4.4016	4.79141	6.94579e-06	0.000474159	3.57547
AHCYL2	-2.49724	5.50271	-4.79055	6.96938e-06	0.000475135	3.57229
RP4-668J24.2	-1.48448	0.475542	-4.79015	6.9803e-06	0.000475246	3.57082
FLVCR2	-2.8078	3.44259	-4.78788	7.04278e-06	0.000478862	3.56245
HECW2	-2.15183	6.13691	-4.78666	7.07638e-06	0.000480267	3.55799
TNFRSF10B	-2.64198	4.67594	-4.78645	7.08223e-06	0.000480267	3.55721
RILP	-2.64532	1.63589	-4.78502	7.12219e-06	0.000482338	3.55193
KL	-2.83086	1.97201	-4.78328	7.17079e-06	0.000484346	3.54554
NAMPT	-1.97677	6.52313	-4.78272	7.18645e-06	0.000484763	3.5435
PCDH12	-2.46611	4.91191	-4.78039	7.25255e-06	0.000488577	3.5349
LATS2-AS1	-1.95627	0.728185	-4.77471	7.41577e-06	0.000498595	3.51401
RP11-875O11.1	-2.23096	5.37672	-4.77453	7.42076e-06	0.000498595	3.51338
SPARCL1	-2.93662	6.02576	-4.77216	7.48993e-06	0.000502582	3.50467
POLE	1.5511	8.96252	4.77146	7.51057e-06	0.000503306	3.50209
KIAA1671	-1.64451	6.93946	-4.77076	7.53113e-06	0.000504024	3.49953
TTK	2.6796	5.14376	4.76875	7.59061e-06	0.000506678	3.49214
ELAVL1	1.70831	7.15532	4.76781	7.61855e-06	0.00050788	3.48869
AL138968.1	-2.84058	2.05607	-4.7673	7.63398e-06	0.000508246	3.4868
B3GNT7	-3.111	3.70648	-4.76581	7.6786e-06	0.000510552	3.48133
SOGA2	2.20026	8.07462	4.76507	7.70067e-06	0.000511354	3.47863
RP11-709A23.2	-2.53609	1.46468	-4.75565	7.98969e-06	0.000529849	3.44406
WFDC12	-1.23433	0.39915	-4.75365	8.0524e-06	0.000532635	3.43672
RP4-669H2.1	1.97968	5.85027	4.75219	8.09856e-06	0.000534321	3.43136
AL391137.1	-1.2432	0.35592	-4.75218	8.09878e-06	0.000534321	3.43133
REEP2	2.80244	3.88173	4.75173	8.11304e-06	0.000534572	3.42968
NUSAP1	2.83515	6.75755	4.75054	8.15072e-06	0.000536006	3.42533
DAPK2	-2.88081	4.33151	-4.75038	8.15577e-06	0.000536006	3.42475
RP11-359M6.2	-2.13952	1.15506	-4.7499	8.17125e-06	0.000536188	3.42297
TIE1	-2.66019	5.10357	-4.74964	8.17951e-06	0.000536188	3.42202
PDGFB	-2.83828	4.183	-4.74699	8.26473e-06	0.00054108	3.4123
PDGFRB	-1.93761	6.97804	-4.74493	8.33129e-06	0.000544741	3.40477
STIL	3.10336	6.22552	4.74429	8.35212e-06	0.000545405	3.40243
SH2D3C	-2.69669	4.77714	-4.74369	8.37181e-06	0.000545994	3.40022
C10orf54	-2.78591	4.93458	-4.74284	8.39966e-06	0.000547112	3.3971
PTPRE	-2.57151	5.10371	-4.74118	8.45425e-06	0.000549273	3.39103
HAS2	-2.99553	2.28797	-4.741	8.46023e-06	0.000549273	3.39036
SERPINE1	-3.03946	6.55339	-4.74085	8.46506e-06	0.000549273	3.38983
SBK1	2.63271	7.36597	4.74021	8.48632e-06	0.000549954	3.38747
RP11-276H7.2	-1.77049	0.634246	-4.73787	8.56411e-06	0.000554293	3.37891
AC004158.2	2.35452	4.8673	4.73389	8.69811e-06	0.000561544	3.36435
MYL9	-3.05017	5.3386	-4.73171	8.77219e-06	0.000565148	3.35639
GALNT5	-3.36868	3.16947	-4.73153	8.77832e-06	0.000565148	3.35574
GAPDHP49	-2.46242	1.36178	-4.73128	8.78709e-06	0.000565148	3.3548
CELSR2	2.06627	8.35693	4.7309	8.80006e-06	0.000565271	3.35342
MT1A	-1.27496	0.360306	-4.72876	8.87357e-06	0.000569278	3.34561
DAB2	-2.26633	6.16385	-4.72747	8.91843e-06	0.000570995	3.34088
MCM7	1.39908	8.06725	4.72735	8.92267e-06	0.000570995	3.34044
WNK3	1.9715	5.7463	4.72355	9.05575e-06	0.000578787	3.32655
AC073072.5	-2.12277	0.707286	-4.7225	9.09261e-06	0.000580417	3.32274
SCN7A	-3.41014	3.90213	-4.72151	9.12797e-06	0.000581436	3.3191
GLB1L2	2.09815	5.94094	4.72071	9.15616e-06	0.000582293	3.31621
CCDC141	-3.45861	4.50599	-4.72005	9.17989e-06	0.000583077	3.31378
RP11-800A3.4	-2.32644	1.43132	-4.71822	9.24549e-06	0.000585788	3.3071
RP11-513N24.1	-2.69616	1.41161	-4.71696	9.29086e-06	0.000587621	3.30251
CYR61	-3.39943	5.58124	-4.71678	9.2974e-06	0.000587621	3.30185
PIGX	1.79634	5.33553	4.71557	9.34134e-06	0.000589669	3.29743
RP5-977B1.11	-3.16932	5.04513	-4.71462	9.37586e-06	0.000591118	3.29397
IHH	-1.66805	0.495232	-4.7128	9.44246e-06	0.000594584	3.28733
C11orf96	-3.53969	2.70966	-4.71195	9.47377e-06	0.000595249	3.28422
CTD-3107M8.4	-3.22805	2.19696	-4.71188	9.47631e-06	0.000595249	3.28397
TFDP2	1.21986	7.67115	4.70852	9.60108e-06	0.000601989	3.27171
RP11-181K3.4	-1.77103	0.72218	-4.70836	9.60715e-06	0.000601989	3.27111
STARD13	-2.56044	4.87044	-4.70679	9.66601e-06	0.000604936	3.26538
NOVA1	2.71634	6.20849	4.70646	9.67827e-06	0.000604963	3.2642
AC079630.4	-1.32713	0.351756	-4.70562	9.70974e-06	0.000605626	3.26115
LRP1	-1.35179	9.41149	-4.70555	9.71257e-06	0.000605626	3.26088
EXT1	-1.36702	6.4506	-4.70397	9.77236e-06	0.000608612	3.25512
FILIP1	-3.19446	3.80066	-4.7022	9.83993e-06	0.000612075	3.24866
TOB2	-1.20165	6.90862	-4.69995	9.92614e-06	0.000616341	3.24048
ARAP3	-1.88641	5.95993	-4.69978	9.93263e-06	0.000616341	3.23987
NPR1	-3.52013	3.46566	-4.69755	1.0019e-05	0.000620198	3.23175
ZSCAN22	1.48961	6.04417	4.69703	1.00393e-05	0.000620701	3.22985
SFXN1	1.38764	6.1912	4.69438	1.01432e-05	0.000625981	3.2202
PVRL1	1.74711	7.43176	4.69423	1.01492e-05	0.000625981	3.21964
AC084290.2	-1.58712	0.489599	-4.69289	1.0202e-05	0.000627982	3.21477
HPGD	-3.34299	2.11584	-4.69279	1.02062e-05	0.000627982	3.21439
IGFBP4	-2.45438	6.15246	-4.69236	1.0223e-05	0.000628262	3.21285
PPARG	-2.88456	3.05735	-4.6918	1.02455e-05	0.000628887	3.21079
PABPC1P11	3.1132	2.99068	4.69103	1.02758e-05	0.000629991	3.20802
RP11-229P13.19	-1.12896	0.28948	-4.68966	1.03306e-05	0.000632594	3.20303
PEAR1	-2.9734	4.77668	-4.68757	1.04147e-05	0.000636219	3.19543
CYP21A2	-2.95289	1.77479	-4.68656	1.04556e-05	0.000637446	3.19176
PEAK1	-1.3394	8.30965	-4.68646	1.04597e-05	0.000637446	3.19138
C1orf138	-3.08491	2.56157	-4.68483	1.05262e-05	0.000640731	3.18545
RP11-795J1.2	-1.68453	0.482394	-4.68424	1.05501e-05	0.000641423	3.18332
GADD45B	-3.60571	4.16733	-4.68343	1.05835e-05	0.000642688	3.18036
ARHGAP18	-2.58078	4.39749	-4.6829	1.06051e-05	0.000643236	3.17845
EPB41L2	-1.98708	6.87118	-4.68116	1.0677e-05	0.000646833	3.17211
AF001548.6	-3.28872	2.2593	-4.67964	1.07401e-05	0.000649885	3.16659
B4GALNT4	3.23883	5.28843	4.67757	1.08266e-05	0.000653667	3.15906
C3	-3.31175	6.72473	-4.67753	1.08282e-05	0.000653667	3.15893
QSOX2	1.32785	6.76002	4.67721	1.08417e-05	0.000653712	3.15776
PIGR	-3.91605	5.46783	-4.67597	1.08941e-05	0.000655962	3.15324
AC000003.1	-1.88199	0.526022	-4.67572	1.09047e-05	0.000655962	3.15233
IL16	-2.64012	5.66651	-4.67303	1.10187e-05	0.000661012	3.14258
LIMD1	-1.26104	7.45143	-4.67289	1.10247e-05	0.000661012	3.14207
MYT1	3.4575	5.98314	4.67283	1.10274e-05	0.000661012	3.14184
WWTR1	-2.32001	5.57833	-4.66971	1.11615e-05	0.000668039	3.13051
PDLIM1	-2.13824	6.03247	-4.66949	1.11708e-05	0.000668039	3.12973
COL4A2	-1.80111	8.05795	-4.66902	1.1191e-05	0.000668413	3.12803
MYLK	-1.62719	7.63639	-4.66874	1.12032e-05	0.000668413	3.12702
LTBP2	-2.30729	6.99609	-4.66827	1.12238e-05	0.000668864	3.12529
KDM1A	1.31053	7.31688	4.66661	1.12961e-05	0.000672388	3.11927
SLIT3	-3.00368	5.77536	-4.66509	1.13628e-05	0.000675569	3.11376
Z98256.1	-3.84805	4.66235	-4.66254	1.14752e-05	0.000681464	3.10453
FAM216B	-3.13869	2.10219	-4.66182	1.15075e-05	0.000682589	3.10189
MCM3	1.8148	7.5709	4.66141	1.15256e-05	0.000682867	3.10042
IPO9	1.02976	8.74359	4.66111	1.15391e-05	0.000682874	3.09933
CLIC2	-3.0427	2.63941	-4.65849	1.16564e-05	0.000689024	3.08984
AC019117.1	-1.44621	0.475254	-4.65712	1.17182e-05	0.000691077	3.08489
RP3-449M8.3	-3.46684	3.74679	-4.65622	1.17591e-05	0.000692126	3.08163
BMPR1APS1	-1.79764	0.589342	-4.65614	1.17631e-05	0.000692126	3.08131
TRIM27	1.3118	6.92313	4.65504	1.18131e-05	0.000694273	3.07733
BTNL8	-2.9257	1.56375	-4.6535	1.18834e-05	0.000696801	3.07177
EIF2B1	1.11625	6.28771	4.65309	1.19026e-05	0.000697126	3.07026
AP000908.1	-2.74151	1.58638	-4.65228	1.19399e-05	0.000698509	3.06733
AC073624.1	-1.47393	0.537075	-4.64937	1.20746e-05	0.000705587	3.05681
SNX33	-2.01815	5.89335	-4.64849	1.21156e-05	0.000707025	3.05363
RP3-425P12.4	-2.93341	1.8723	-4.64825	1.21269e-05	0.000707025	3.05276
SVEP1	-3.1102	5.21565	-4.64629	1.22193e-05	0.000711602	3.04565
ZFP106	-1.28001	7.84176	-4.64336	1.23581e-05	0.000718863	3.03507
EPHA2	-3.65662	3.68998	-4.64145	1.24497e-05	0.00072255	3.02814
MEX3B	2.61075	5.3148	4.64108	1.24672e-05	0.000722746	3.02683
RP11-392P7.6	-2.92051	2.47757	-4.63916	1.25601e-05	0.000727266	3.01987
RP11-83M16.2	-2.07077	0.887681	-4.63778	1.26274e-05	0.000727266	3.01486
MS4A15	-4.26787	2.23861	-4.63741	1.26454e-05	0.000727266	3.01353
SEMA3B	-2.1772	4.6189	-4.63734	1.26485e-05	0.000727266	3.0133
RASSF2	-2.06131	5.82582	-4.63725	1.2653e-05	0.000727266	3.01297
RBBP4	1.59922	8.07647	4.63714	1.26584e-05	0.000727266	3.01257
RP11-110I1.12	2.94669	4.12806	4.63713	1.2659e-05	0.000727266	3.01252
EMCN	-3.15837	2.89203	-4.63565	1.27315e-05	0.000730613	3.00717
XKR7	2.7717	4.01753	4.63418	1.28039e-05	0.000733944	3.00186
VIM	-2.37084	7.6375	-4.62805	1.31098e-05	0.000748958	2.97974
NR3C2	-3.30909	3.59704	-4.62649	1.31892e-05	0.000751814	2.97408
RP4-592A1.2	-1.02591	0.319988	-4.62649	1.31892e-05	0.000751814	2.97408
AL928654.7	-2.56956	1.43341	-4.62574	1.32272e-05	0.000753141	2.97139
AGPAT9	-2.8296	1.60252	-4.62507	1.32612e-05	0.000754238	2.96898
SRPX	-3.126	1.47874	-4.62453	1.32889e-05	0.000754969	2.96703
CTD-2207P18.1	-2.91751	1.81262	-4.62422	1.33051e-05	0.000755051	2.96589
NFKBIZ	-2.53465	6.03901	-4.62368	1.33323e-05	0.000755573	2.96397
AC079630.2	-1.1369	0.390521	-4.6234	1.33468e-05	0.000755573	2.96295
APLP1	3.22984	5.67398	4.62317	1.33586e-05	0.000755573	2.96213
RP11-467L20.9	-1.82678	0.736021	-4.62233	1.34021e-05	0.000756444	2.95908
LCORL	2.18456	5.97838	4.6223	1.34036e-05	0.000756444	2.95898
MYO3A	3.01204	6.7722	4.61904	1.35729e-05	0.000763474	2.94721
OSMR	-2.78202	5.28033	-4.61799	1.36276e-05	0.000765432	2.94345
GFOD1	-1.51108	5.73519	-4.6178	1.36377e-05	0.000765432	2.94276
RP5-1051J4.6	-1.79881	0.646492	-4.61691	1.36847e-05	0.000766889	2.93953
STAT3	-1.27599	7.90281	-4.61674	1.36936e-05	0.000766889	2.93892
NOTCH2	-2.25007	7.25775	-4.61512	1.3779e-05	0.000769536	2.9331
MYO1F	-2.51033	4.90224	-4.61499	1.37861e-05	0.000769536	2.93262
AP003064.1	-1.21466	0.351022	-4.61433	1.38213e-05	0.000770627	2.93023
HIF3A	-3.16233	5.80497	-4.61406	1.38357e-05	0.000770627	2.92925
P2RY1	-2.87773	1.82399	-4.61109	1.39945e-05	0.00077862	2.91857
MRVI1-AS1	-2.60825	1.76432	-4.61035	1.40343e-05	0.000779988	2.9159
TMEM71	-2.68015	2.16961	-4.60957	1.40765e-05	0.000781485	2.91309
KIF4A	2.46944	5.74184	4.60352	1.4408e-05	0.000799018	2.89129
SENP1	1.04438	6.6155	4.60019	1.45931e-05	0.00080753	2.87934
HLA-DRA	-3.286	5.74209	-4.59967	1.46226e-05	0.000808291	2.87745
PDXK	-1.03763	7.64868	-4.59916	1.46512e-05	0.000808354	2.87562
FZD4	-2.39305	5.69018	-4.59883	1.46696e-05	0.000808354	2.87444
RP11-101C21.1	-1.83174	0.640656	-4.5988	1.46712e-05	0.000808354	2.87434
AGPAT5	2.24396	6.29599	4.59734	1.47537e-05	0.000812026	2.86909
BMP2	-3.46692	3.53533	-4.59482	1.48974e-05	0.000819055	2.86001
LTA4H	-1.08548	6.52506	-4.59082	1.51276e-05	0.000830815	2.84565
C17orf72	-2.57383	3.5775	-4.58876	1.52477e-05	0.000836512	2.83825
CLEC2B	-2.91728	2.32084	-4.58844	1.52668e-05	0.000836661	2.83708
SIDT2	-1.37964	6.71986	-4.58568	1.54294e-05	0.000843559	2.82716
ACSL5	-2.53071	4.12652	-4.58546	1.54421e-05	0.000843559	2.82638
CD81	-1.7559	7.33901	-4.58423	1.55154e-05	0.000846655	2.82195
ALDH3B1	-2.41562	5.04058	-4.5828	1.56002e-05	0.000850378	2.81685
MGLL	-1.78155	6.87124	-4.58216	1.56387e-05	0.000851569	2.81454
PLIN5	-2.9006	2.15061	-4.58186	1.56569e-05	0.000851651	2.81345
RP11-403P17.3	-2.15339	1.41158	-4.58121	1.56959e-05	0.000852668	2.81112
LRG1	-2.51322	1.36451	-4.57922	1.58161e-05	0.000857577	2.80398
TDRKH	1.88625	5.30112	4.5769	1.59575e-05	0.000863409	2.79565
KLF12	1.77985	7.53332	4.57557	1.60389e-05	0.000866896	2.79089
OGDHL	3.1331	4.82869	4.57521	1.60611e-05	0.000867182	2.78959
CBX5	1.59569	9.87295	4.5747	1.60921e-05	0.000867938	2.78778
AURKB	2.77791	5.19644	4.57166	1.62806e-05	0.000877177	2.77688
KIAA2022	3.14796	5.41593	4.57101	1.63213e-05	0.000878446	2.77454
IPPK	1.2916	5.99013	4.56844	1.64827e-05	0.000885272	2.76533
RP11-2E17.1	-2.80224	1.55369	-4.56653	1.66035e-05	0.000889623	2.7585
POLA2	1.16753	6.87606	4.56645	1.66085e-05	0.000889623	2.75822
RP11-198M11.2	-1.16921	0.330071	-4.56606	1.66333e-05	0.000889623	2.75682
CENPL	2.43152	4.98973	4.56606	1.66334e-05	0.000889623	2.75682
RP5-1142A6.9	-2.70317	4.45254	-4.56528	1.6683e-05	0.000891348	2.75402
FEN1	2.0355	5.87347	4.56382	1.67768e-05	0.000894487	2.74878
SIK1	-1.99313	6.66429	-4.56202	1.68923e-05	0.000899711	2.74235
ABI3	-2.58387	3.37481	-4.55846	1.71242e-05	0.000910164	2.72959
ARHGAP26-IT1	-1.68517	0.79131	-4.55673	1.72376e-05	0.000914646	2.72342
SLC22A3	-3.10715	2.70777	-4.55663	1.72443e-05	0.000914646	2.72305
HYAL2	-2.68946	4.76063	-4.55492	1.73576e-05	0.000919699	2.71693
SPTB	1.60273	7.55278	4.55373	1.74361e-05	0.000921948	2.7127
HHIP	-2.88569	4.51901	-4.54922	1.77397e-05	0.0009351	2.69655
ZNF525	1.90812	5.14272	4.5482	1.78087e-05	0.000937772	2.69291
TMEM173	-2.24323	5.12821	-4.54722	1.78755e-05	0.000940323	2.68941
FRMD4B	-2.33789	5.61398	-4.54674	1.7908e-05	0.000941064	2.68771
LIMCH1	-2.60583	7.24496	-4.54616	1.79476e-05	0.000942174	2.68564
HLA-DRB6	-2.15045	0.888494	-4.54236	1.82101e-05	0.000954977	2.67205
NPM2	3.04226	3.10552	4.54164	1.82601e-05	0.000955755	2.66949
RP11-388M20.2	-2.86685	2.00577	-4.54161	1.82624e-05	0.000955755	2.66937
OCIAD2	2.71199	4.62142	4.54056	1.83354e-05	0.000958454	2.66564
PLK3	-2.52735	4.79014	-4.54014	1.83652e-05	0.000958454	2.66412
COL6A6	-3.19143	5.17198	-4.54007	1.83702e-05	0.000958454	2.66387
E2F7	2.9816	6.75955	4.53904	1.8442e-05	0.000960243	2.66021
CAD	1.15064	7.56023	4.53688	1.85945e-05	0.000967197	2.65251
VGLL3	-3.066	4.47287	-4.53335	1.88469e-05	0.000979331	2.63989
LPHN2	-2.02437	6.66804	-4.5308	1.90307e-05	0.000986875	2.63081
GIMAP7	-2.99635	2.59494	-4.53001	1.90884e-05	0.000988864	2.62798
IFITM2	-3.1166	4.2487	-4.52814	1.92243e-05	0.000994897	2.62134
LMNB1	2.26571	7.16553	4.52669	1.93311e-05	0.00099941	2.61616
TRIB1	-2.71788	5.76073	-4.52586	1.93921e-05	0.00100155	2.61321
RP11-360F5.3	-1.72717	0.698066	-4.52528	1.94354e-05	0.00100278	2.61113
CALCRL	-2.71488	3.66742	-4.52078	1.97708e-05	0.00101905	2.59512
PODXL	-1.18327	7.23403	-4.51834	1.99551e-05	0.00102752	2.58644
CCND1	-2.96772	4.9425	-4.51683	2.00704e-05	0.0010323	2.58105
MRGPRF	-2.28725	1.2038	-4.5166	2.00883e-05	0.0010323	2.58022
CA2	-2.6703	1.77938	-4.51603	2.01315e-05	0.00103348	2.57821
ZNF780B	1.58509	6.32588	4.51463	2.02387e-05	0.0010369	2.57324
MYO7B	-3.47562	3.77136	-4.51408	2.02811e-05	0.00103803	2.57128
RP11-27M24.1	-3.08743	5.35931	-4.51294	2.03698e-05	0.00103915	2.5672
AC008440.5	-3.36839	4.60614	-4.51275	2.03842e-05	0.00103915	2.56654
MAMDC2	-3.04482	3.81835	-4.51234	2.04164e-05	0.00103975	2.56507
S100A9	-2.55615	1.31075	-4.51151	2.04805e-05	0.00104198	2.56213
AC016909.1	-2.45906	1.48965	-4.51105	2.05163e-05	0.00104276	2.5605
AFAP1L1	-2.4031	4.9772	-4.51035	2.05714e-05	0.00104452	2.55799
CCR1	-2.66311	1.85567	-4.50989	2.06074e-05	0.00104531	2.55635
RAD17P1	-2.40201	0.988614	-4.5091	2.06693e-05	0.00104741	2.55355
DEPDC1	2.55951	5.27511	4.50698	2.08361e-05	0.00105404	2.54603
SUZ12P1	1.53277	6.83206	4.5067	2.08583e-05	0.00105404	2.54504
RSPO2	-2.34947	1.38821	-4.50666	2.08619e-05	0.00105404	2.54487
TMEM37	-2.7961	1.94267	-4.50448	2.10352e-05	0.00106131	2.53714
NRADDP	-1.30891	0.486171	-4.50425	2.10538e-05	0.00106131	2.53631
CXCL16	-3.02811	4.18211	-4.50407	2.1068e-05	0.00106131	2.53568
RP11-417N10.3	-1.93196	0.624634	-4.5033	2.11299e-05	0.00106183	2.53294
C3orf67	2.09848	4.95307	4.50172	2.12571e-05	0.00106663	2.52732
RP11-136K14.1	-1.47086	0.57388	-4.49969	2.14218e-05	0.0010736	2.52011
PKDCC	-2.68185	3.24771	-4.49896	2.14811e-05	0.0010736	2.51752
UCHL1	2.84531	6.72859	4.49871	2.1501e-05	0.0010736	2.51666
PRC1	2.1802	7.45392	4.49679	2.16582e-05	0.00107917	2.50984
SOD2	-1.4085	7.75072	-4.49668	2.16676e-05	0.00107917	2.50944
OPA1	1.38767	7.36814	4.49644	2.16872e-05	0.00107917	2.50859
SOD3	-3.39395	3.56476	-4.49632	2.1697e-05	0.00107917	2.50817
MBNL1	-1.35318	7.99061	-4.49438	2.18577e-05	0.00108487	2.50127
RP3-340B19.5	-2.29905	1.19426	-4.49427	2.18663e-05	0.00108487	2.5009
AC013275.2	-2.95605	1.90363	-4.49404	2.18858e-05	0.00108487	2.50007
IL8	-3.04771	1.85561	-4.49391	2.18964e-05	0.00108487	2.49961
QKI	-1.14004	7.44796	-4.49315	2.19593e-05	0.00108691	2.49693
SPATA13	-1.73458	6.43399	-4.49291	2.19801e-05	0.00108691	2.49605
ARL17B	1.15583	6.45745	4.49053	2.21795e-05	0.00109465	2.4876
NONO	1.00591	9.22739	4.48742	2.24424e-05	0.00110656	2.47658
CTC-297N7.9	-1.13584	0.3668	-4.48634	2.25338e-05	0.00111	2.47278
NKD1	-2.8519	3.80253	-4.48591	2.2571e-05	0.00111076	2.47124
RARA	-2.00557	5.46339	-4.48511	2.26391e-05	0.00111304	2.46842
EGFL7	-3.0893	4.98309	-4.48485	2.26615e-05	0.00111307	2.4675
SERTAD3	-2.56556	3.12105	-4.48302	2.28194e-05	0.00111975	2.46101
LAMA3	-2.55535	6.70722	-4.48133	2.29662e-05	0.00112587	2.45502
RP3-342P20.2	-2.67487	1.71562	-4.48009	2.30743e-05	0.00113009	2.45062
KSR2	2.48344	7.76664	4.47947	2.31288e-05	0.00113167	2.44842
ONECUT2	2.58695	7.99957	4.47865	2.32006e-05	0.0011341	2.44552
RN5S159	-1.9602	0.921205	-4.47786	2.32698e-05	0.00113621	2.44274
PRKCE	-1.69049	6.14365	-4.47741	2.33098e-05	0.00113621	2.44113
RP11-57C13.3	-2.03455	0.978802	-4.4774	2.33104e-05	0.00113621	2.44111
NXPH4	3.49137	4.61778	4.47688	2.33564e-05	0.00113736	2.43926
CDC42EP1	-3.46393	3.9087	-4.47625	2.34124e-05	0.00113736	2.43702
STAT6	-1.75421	7.22362	-4.47617	2.34197e-05	0.00113736	2.43673
KLHDC8A	3.43279	4.08488	4.47613	2.34231e-05	0.00113736	2.4366
ORC1	2.23388	4.42904	4.47347	2.36599e-05	0.00114568	2.42719
TFR2	2.98429	3.81109	4.47341	2.36653e-05	0.00114568	2.42698
TBC1D2	-2.24665	4.32892	-4.47296	2.37056e-05	0.00114568	2.42539
AACS	1.49081	7.91565	4.47292	2.37094e-05	0.00114568	2.42524
FKBP5	-2.03759	7.34415	-4.4727	2.37288e-05	0.00114568	2.42447
RP4-773N10.4	1.76252	5.87066	4.4723	2.37646e-05	0.00114633	2.42307
DCN	-3.06802	5.858	-4.47102	2.38801e-05	0.00115081	2.41853
GIMAP6	-2.81013	3.58106	-4.4688	2.40819e-05	0.00115836	2.41067
BRIP1	2.3689	5.95824	4.4675	2.42002e-05	0.00116295	2.40609
RP11-410A13.3	-1.47613	0.405556	-4.46715	2.42326e-05	0.00116341	2.40484
TRIM36	2.65396	4.96606	4.46582	2.43548e-05	0.00116818	2.40014
C15orf26	-2.45028	1.55152	-4.46331	2.45864e-05	0.00117709	2.39129
RP11-680F8.4	-2.51888	1.63376	-4.46281	2.46335e-05	0.00117824	2.3895
CNN2	-3.00721	5.15031	-4.46128	2.47763e-05	0.00118396	2.3841
CD36	-3.2982	3.77823	-4.46041	2.48581e-05	0.00118676	2.38102
FAM89A	-2.73353	2.31267	-4.45994	2.49021e-05	0.00118775	2.37936
AC108004.2	-1.33857	0.491143	-4.45967	2.4927e-05	0.00118783	2.37843
ADAMTS9	-2.37394	5.62785	-4.45582	2.52929e-05	0.00120414	2.36481
ACP5	-2.53889	3.83032	-4.45052	2.58038e-05	0.00122618	2.34612
GYPC	-2.97625	3.31218	-4.44524	2.63226e-05	0.00124852	2.32752
RUNDC3A	3.08776	5.52535	4.44263	2.65831e-05	0.00125854	2.31832
PRELP	-2.67303	6.1111	-4.44159	2.66882e-05	0.0012621	2.31463
PSD3	1.62177	7.93359	4.44139	2.67077e-05	0.0012621	2.31395
CTNND1	-1.10258	8.63697	-4.43925	2.69247e-05	0.00127118	2.30639
MIR23A	-2.63432	1.10371	-4.43809	2.70421e-05	0.00127554	2.30233
SYT5	3.35318	4.41791	4.43593	2.72633e-05	0.00128434	2.29471
ITGA1	-1.86449	6.77172	-4.43462	2.73981e-05	0.00128877	2.29011
OSTBETA	-2.13411	0.983565	-4.43369	2.74942e-05	0.00129022	2.28683
RP11-280F2.1	-1.2391	0.460475	-4.43368	2.74957e-05	0.00129022	2.28678
CAPN2	-1.35854	7.69772	-4.43096	2.77781e-05	0.00130185	2.27724
ICAM2	-2.62314	3.13684	-4.43029	2.78489e-05	0.00130398	2.27486
SCARA5	-2.98218	1.88001	-4.42843	2.80443e-05	0.00131072	2.26833
FOXO3	-1.18556	7.77766	-4.4262	2.82801e-05	0.00132054	2.2605
RP1-56L9.3	2.6048	3.42455	4.42362	2.85563e-05	0.00133222	2.25143
NR4A1	-2.19323	8.05818	-4.42259	2.86674e-05	0.00133618	2.2478
KIF22	1.84084	6.80613	4.42231	2.86971e-05	0.00133635	2.24683
RP11-867G23.12	-1.11067	0.44614	-4.42149	2.87861e-05	0.00133928	2.24394
PRICKLE2	-2.76412	5.25676	-4.41988	2.89614e-05	0.00134621	2.23827
RP11-678G15.1	-2.91396	2.26858	-4.41945	2.90076e-05	0.00134713	2.23678
MCL1	-1.65605	8.55701	-4.41728	2.92452e-05	0.00135693	2.22916
RND1	-2.88425	4.09849	-4.41582	2.94063e-05	0.00136317	2.22403
MUC15	-2.53148	1.72038	-4.41475	2.95245e-05	0.00136711	2.22028
HBEGF	-2.86865	3.42755	-4.41457	2.95449e-05	0.00136711	2.21964
KDR	-2.9921	4.23805	-4.41274	2.97492e-05	0.00137532	2.2132
MNDA	-2.73429	1.9937	-4.4124	2.9787e-05	0.00137583	2.21202
TTC28	-1.18235	7.68933	-4.41198	2.98339e-05	0.00137675	2.21055
RP11-159H10.3	2.80056	2.85654	4.41052	2.99973e-05	0.00138304	2.20545
ALOX5	-2.40751	5.26036	-4.40922	3.01442e-05	0.00138856	2.20088
TMOD3	-1.41305	6.84373	-4.40873	3.01999e-05	0.00138987	2.19916
LINC00312	-2.58987	1.72739	-4.40756	3.03334e-05	0.00139401	2.19504
RP11-430H12.2	-1.9946	1.15504	-4.40746	3.03442e-05	0.00139401	2.19471
ILF2	1.7416	7.09395	4.40718	3.03765e-05	0.00139424	2.19372
NOL4	3.13965	7.17706	4.40589	3.05241e-05	0.00139976	2.18919
TNFSF13	-2.8982	2.52347	-4.40426	3.07111e-05	0.00140707	2.18349
ABCG2	-2.64898	2.38133	-4.40078	3.11149e-05	0.00142429	2.17129
C1orf51	2.71302	4.36502	4.39949	3.12652e-05	0.00142989	2.16679
ALPP	-1.55037	0.607493	-4.39881	3.13451e-05	0.00143227	2.16441
DBF4B	1.70745	6.5204	4.39667	3.15987e-05	0.00144256	2.15688
ITGA8	-3.48231	3.69352	-4.39473	3.18282e-05	0.00145175	2.15013
SLC4A8	1.5137	6.67859	4.39426	3.18853e-05	0.00145306	2.14845
SLC7A1	1.60001	7.99762	4.39389	3.19288e-05	0.00145374	2.14718
ZFP30	1.74915	5.36053	4.39305	3.20292e-05	0.00145702	2.14425
STK10	-1.70317	6.2679	-4.39242	3.21058e-05	0.0014592	2.14202
MPHOSPH9	1.36334	7.63582	4.39193	3.21649e-05	0.00145943	2.1403
NARS2	1.7981	4.51085	4.3919	3.21679e-05	0.00145943	2.14021
TMEM132A	2.12344	6.70789	4.39124	3.22478e-05	0.00146176	2.1379
MRPL52	1.77226	4.50916	4.39075	3.23074e-05	0.00146316	2.13617
SLPI	-4.05213	3.17189	-4.39029	3.23632e-05	0.00146439	2.13456
BUB1B	2.329	6.0007	4.38992	3.24078e-05	0.00146511	2.13328
MCM10	2.68565	4.64054	4.38954	3.24532e-05	0.00146587	2.13197
RP5-1142A6.8	-2.61236	1.87627	-4.38883	3.25405e-05	0.00146852	2.12946
ARID5B	-1.94372	6.40288	-4.38811	3.26277e-05	0.00147036	2.12696
ARHGAP11B	1.64535	5.98073	4.38802	3.26389e-05	0.00147036	2.12664
RBBP8	1.74084	7.12644	4.38685	3.27829e-05	0.00147555	2.12253
PLEKHO2	-2.44651	4.96041	-4.38563	3.29328e-05	0.00147934	2.11827
PFKFB3	-1.78663	6.87809	-4.38558	3.29391e-05	0.00147934	2.1181
FOXN4	3.67655	4.37049	4.38525	3.29793e-05	0.00147934	2.11696
C1orf198	-1.48756	6.38106	-4.38522	3.29829e-05	0.00147934	2.11685
PLXDC1	1.65716	6.11271	4.38328	3.3223e-05	0.00148793	2.11008
BIRC5	3.12516	5.29435	4.38321	3.32326e-05	0.00148793	2.10982
FKBP4	1.71478	6.68473	4.38	3.36345e-05	0.00150461	2.09859
CDC5L	1.22585	6.60727	4.37895	3.37657e-05	0.00150811	2.09496
HMCN1	-2.68378	6.1012	-4.37891	3.37718e-05	0.00150811	2.09479
CHD5	3.3921	5.62742	4.37856	3.38154e-05	0.00150874	2.09359
RP11-531A24.3	2.90373	4.98627	4.37788	3.39011e-05	0.00151124	2.09122
AC092535.1	-2.56307	1.59547	-4.37641	3.40886e-05	0.00151828	2.08608
FAM54B	1.08877	6.01403	4.37591	3.41528e-05	0.00151982	2.08432
KIF18B	2.85027	6.68029	4.37398	3.43998e-05	0.00152948	2.07759
PRR16	-2.31292	1.39542	-4.3737	3.44363e-05	0.00152977	2.0766
IL33	-3.13133	2.04671	-4.37321	3.44987e-05	0.00153121	2.07491
CTB-113P19.4	-1.26585	0.556883	-4.37045	3.48569e-05	0.00154577	2.06527
TONSL	1.91544	6.58103	4.3697	3.49538e-05	0.00154872	2.06268
CIT	1.53631	8.50377	4.36849	3.51134e-05	0.00155445	2.05843
AZI1	1.93754	5.97528	4.36771	3.52152e-05	0.0015576	2.05573
CHN2	1.84207	6.64642	4.36499	3.55748e-05	0.00157215	2.04625
POLR3H	-1.73917	6.75117	-4.3643	3.56667e-05	0.00157485	2.04384
HMHA1	-2.20212	5.00127	-4.36292	3.58505e-05	0.00158029	2.03904
TACSTD2	-3.25461	2.65788	-4.36291	3.58518e-05	0.00158029	2.03901
RP11-104L21.2	-1.60309	0.688964	-4.36085	3.61294e-05	0.00159116	2.03181
DPYSL5	2.99891	7.72247	4.35734	3.66052e-05	0.00161001	2.0196
ABHD12	1.40397	6.6033	4.35723	3.66204e-05	0.00161001	2.01921
EPHA10	2.53821	5.59984	4.35579	3.68174e-05	0.00161728	2.01421
OR5P4P	-1.97925	0.829294	-4.35491	3.69393e-05	0.00162051	2.01113
AC008753.6	-1.12693	0.419935	-4.35477	3.69585e-05	0.00162051	2.01064
RP11-672A2.4	-2.0202	0.914171	-4.35457	3.69862e-05	0.00162051	2.00994
PRCD	-2.41757	1.44526	-4.35396	3.70692e-05	0.00162156	2.00785
INCENP	1.62327	7.13736	4.35393	3.70735e-05	0.00162156	2.00774
MYOF	-2.24094	5.92748	-4.35175	3.7376e-05	0.0016334	2.00016
RP11-628O18.1	-1.59345	0.456213	-4.34959	3.76793e-05	0.00164524	1.99262
SMPD3	1.77379	7.12603	4.34859	3.78191e-05	0.00164732	1.98916
RP11-314P12.2	-2.70476	1.70217	-4.34856	3.78235e-05	0.00164732	1.98905
EYA1	3.67824	5.95861	4.34715	3.80227e-05	0.00165337	1.98415
DRD2	3.35817	5.23622	4.34712	3.80272e-05	0.00165337	1.98404
S100A10	-3.60542	3.42318	-4.34549	3.82585e-05	0.00166202	1.97839
CDC6	2.2056	5.37468	4.34495	3.83365e-05	0.00166399	1.97649
PODXL2	2.30118	5.64698	4.34357	3.85331e-05	0.00167111	1.97171
RP11-356I2.2	-1.47784	0.536466	-4.34285	3.86373e-05	0.00167421	1.96919
S100A3	-1.35306	0.580559	-4.33973	3.90879e-05	0.00169086	1.95838
CENPF	2.47597	9.30081	4.33903	3.91905e-05	0.00169387	1.95593
RP11-815J21.4	-3.09933	2.57933	-4.33853	3.92635e-05	0.00169533	1.9542
PTGER4	-2.88331	3.59558	-4.33806	3.93321e-05	0.00169533	1.95257
GATA6	-2.91371	2.80812	-4.33801	3.93392e-05	0.00169533	1.9524
DLL3	3.06506	3.58295	4.33789	3.93568e-05	0.00169533	1.95198
TMEM88	-2.63212	2.0163	-4.33649	3.95619e-05	0.00170273	1.94714
GJA1	-2.68582	3.97529	-4.33442	3.98687e-05	0.00171431	1.93993
TIMELESS	2.02666	7.47972	4.33422	3.9898e-05	0.00171431	1.93924
MCM5	1.19813	7.36453	4.33361	3.9988e-05	0.00171673	1.93714
Z95704.4	-1.22004	0.415874	-4.3332	4.00494e-05	0.00171792	1.93571
CD74	-2.38213	8.99858	-4.33196	4.02347e-05	0.00172443	1.9314
MCAM	-1.40856	6.66162	-4.32966	4.05801e-05	0.00173777	1.92343
MPP3	-2.84589	3.85188	-4.32685	4.10065e-05	0.00175456	1.91368
BIN2	-2.70714	3.48586	-4.32586	4.11579e-05	0.00175957	1.91025
CSRP1	-1.19846	7.85027	-4.32549	4.1215e-05	0.00176054	1.90895
RP11-157P1.5	-2.7412	2.79788	-4.32502	4.12862e-05	0.00176211	1.90734
GMNN	2.31992	4.32164	4.32245	4.16831e-05	0.00177489	1.89842
ATHL1	-2.60847	5.89248	-4.32241	4.16886e-05	0.00177489	1.8983
AXL	-2.33615	5.38482	-4.3221	4.17368e-05	0.00177489	1.89722
C14orf43	-1.15026	7.9427	-4.32186	4.17733e-05	0.00177489	1.89641
TAGLN	-2.05326	6.46042	-4.3218	4.17838e-05	0.00177489	1.89617
RP11-63N8.3	-1.43022	0.520139	-4.32173	4.1794e-05	0.00177489	1.89594
STX1A	2.40569	5.89063	4.32102	4.1904e-05	0.00177722	1.89349
RP11-26M5.3	3.23622	3.3868	4.32093	4.19185e-05	0.00177722	1.89317
AC053503.6	-3.02947	1.76879	-4.32037	4.20064e-05	0.00177786	1.89122
C1orf132	-1.63866	5.32963	-4.32022	4.20291e-05	0.00177786	1.89071
TFPI	-2.51319	6.0327	-4.32016	4.20378e-05	0.00177786	1.89052
CTA-363E6.6	-2.50649	2.09267	-4.31786	4.23996e-05	0.00179168	1.88253
DDX11	1.4717	7.79838	4.31717	4.25069e-05	0.00179473	1.88017
AP002380.1	-1.00585	0.415444	-4.3146	4.29155e-05	0.00181049	1.87125
DLGAP3	3.17878	4.43155	4.31336	4.31131e-05	0.00181661	1.86697
GRN	-1.80534	6.41697	-4.31324	4.31317e-05	0.00181661	1.86656
LPL	-2.68307	4.62675	-4.3122	4.32985e-05	0.00182214	1.86297
RP11-474N24.2	-2.30624	1.23029	-4.30951	4.37325e-05	0.00183829	1.85367
ZNF643	2.93113	3.46501	4.30938	4.37542e-05	0.00183829	1.8532
LIMA1	-1.21285	6.56784	-4.30592	4.43187e-05	0.00186048	1.84125
GTSE1	2.23115	5.78112	4.30479	4.45053e-05	0.00186678	1.83734
GRIK5	3.14947	5.90355	4.3028	4.4835e-05	0.00187861	1.83046
PABPC1L	1.67224	7.18509	4.30264	4.4861e-05	0.00187861	1.82991
RP11-158M2.3	-2.53592	4.77962	-4.3009	4.51507e-05	0.0018892	1.82391
STXBP5L	2.37156	6.50818	4.29926	4.54264e-05	0.00189912	1.81824
SLC44A2	-1.08744	7.34375	-4.29891	4.54845e-05	0.00189912	1.81705
CEP192	1.13822	8.47811	4.29883	4.54992e-05	0.00189912	1.81675
GRK5	-2.50735	4.71777	-4.298	4.56391e-05	0.00190176	1.81388
HPSE	2.51288	4.56679	4.29781	4.5671e-05	0.00190176	1.81323
RP1-278C19.3	-1.65136	5.61857	-4.29779	4.56741e-05	0.00190176	1.81317
ECT2	1.90887	7.05728	4.29728	4.57596e-05	0.00190344	1.81142
PPYR1	-2.0977	1.13254	-4.2968	4.58424e-05	0.00190344	1.80974
MARK1	1.84004	6.05818	4.2967	4.58585e-05	0.00190344	1.80941
HMGB3	1.68934	6.65753	4.29667	4.58634e-05	0.00190344	1.80931
ATP8A2	3.63475	6.71153	4.29606	4.59669e-05	0.00190619	1.80721
GIMAP5	-2.6585	4.79286	-4.29036	4.69472e-05	0.0019448	1.78754
PIF1	2.39364	5.05022	4.29021	4.69739e-05	0.0019448	1.78701
DBNDD1	2.4906	5.30542	4.28887	4.72074e-05	0.00195288	1.78239
RP11-363J20.1	2.40867	2.75807	4.28717	4.75039e-05	0.00196228	1.77656
RP11-541N10.3	-2.40442	2.68226	-4.28713	4.75114e-05	0.00196228	1.77641
RNF168	1.44597	7.62748	4.283	4.82426e-05	0.00198927	1.76218
LMCD1	-2.92363	4.29275	-4.28187	4.84442e-05	0.00199597	1.75829
THBS1	-2.48471	7.96194	-4.28101	4.85975e-05	0.00199839	1.75534
GPR126	-2.83236	3.97297	-4.28094	4.8611e-05	0.00199839	1.75509
LIG1	1.59103	7.39091	4.28089	4.86202e-05	0.00199839	1.75491
AQP3	-2.98038	3.56395	-4.28018	4.8748e-05	0.00200204	1.75246
AC073283.4	2.56012	4.25695	4.27981	4.88142e-05	0.0020023	1.7512
PNMA1	1.69912	5.85294	4.27971	4.88327e-05	0.0020023	1.75085
CTD-2562J17.9	-2.52154	1.50198	-4.27794	4.91518e-05	0.0020132	1.74477
SIGLEC11	-1.63796	0.777163	-4.27748	4.92362e-05	0.002014	1.74318
SERPINB1	-2.61807	4.80413	-4.27611	4.94865e-05	0.00202262	1.73845
CSDA	-2.69315	6.18974	-4.27578	4.95465e-05	0.00202345	1.73732
TMEM198	2.43547	4.09099	4.27497	4.96939e-05	0.00202681	1.73455
CDKN2B-AS1	2.14982	5.56211	4.2749	4.97081e-05	0.00202681	1.73429
MYH10	-1.21476	8.07703	-4.27436	4.98065e-05	0.00202921	1.73244
BSN	1.8895	8.16894	4.27395	4.98812e-05	0.00203063	1.73105
DYSF	-2.58755	5.34715	-4.27301	5.00545e-05	0.00203607	1.72782
OLFML3	-2.91506	2.83752	-4.27239	5.01695e-05	0.00203912	1.72568
HOOK1	1.82312	6.38392	4.26955	5.06984e-05	0.00205898	1.71591
BDH1	2.26653	6.29398	4.2691	5.07833e-05	0.00206029	1.71435
TMEM74B	-2.80468	2.88588	-4.26895	5.08111e-05	0.00206029	1.71384
MIR378E	-1.14245	0.358252	-4.26854	5.08879e-05	0.00206177	1.71243
TAL1	-3.07413	3.02553	-4.26723	5.11347e-05	0.00206566	1.70792
RP11-102F4.3	2.66551	3.74609	4.26717	5.11445e-05	0.00206566	1.70775
PLEKHH2	-2.21103	6.63832	-4.26717	5.11457e-05	0.00206566	1.70772
DPEP2	-3.00015	2.45344	-4.26592	5.13822e-05	0.00207211	1.70343
HIST1H1B	3.59938	5.93675	4.2659	5.13863e-05	0.00207211	1.70335
ERG	-2.51204	5.14907	-4.26255	5.2024e-05	0.00209617	1.69186
CD9	-2.6379	5.22282	-4.26141	5.22432e-05	0.00210334	1.68794
SEMA5A	-2.06796	6.28098	-4.2608	5.23599e-05	0.00210638	1.68587
RP11-436I9.2	-2.89569	2.68885	-4.25553	5.33873e-05	0.00214434	1.66776
PLK1	2.54484	5.91675	4.25507	5.34779e-05	0.0021463	1.66618
CASP8AP2	1.20136	7.69019	4.25316	5.38542e-05	0.0021597	1.65965
RP11-423H2.3	2.43309	4.35248	4.2512	5.42448e-05	0.00217309	1.65292
SLC6A14	-3.20619	2.63845	-4.25106	5.4273e-05	0.00217309	1.65244
LATS2	-2.98154	3.5546	-4.24956	5.45735e-05	0.00218341	1.64729
CNN1	-3.09442	2.40918	-4.24894	5.46967e-05	0.00218492	1.6452
SRD5A1	2.33791	4.34085	4.24812	5.4862e-05	0.00218981	1.64238
RBMS3-AS2	-2.13312	1.45029	-4.24753	5.49822e-05	0.00219072	1.64035
CD14	-2.66878	2.13207	-4.24745	5.49977e-05	0.00219072	1.64008
RP11-291L15.2	-1.99424	0.93731	-4.24737	5.50134e-05	0.00219072	1.63982
SH3GL2	3.06218	4.2072	4.24699	5.50921e-05	0.00219215	1.63849
HIST1H2BC	2.69204	6.28417	4.24634	5.52227e-05	0.00219564	1.63628
RP11-56B16.1	-2.18537	1.50798	-4.24595	5.53021e-05	0.00219709	1.63494
ESCO2	1.85445	5.42655	4.24427	5.56456e-05	0.00220902	1.62918
PLXDC2	-2.63411	4.76062	-4.24397	5.57062e-05	0.00220971	1.62816
TTN	-1.91762	9.32692	-4.24263	5.59812e-05	0.00221408	1.62358
ANKRD44	-1.29679	6.50366	-4.2426	5.59876e-05	0.00221408	1.62347
RP11-216B9.8	-1.09731	0.510051	-4.24259	5.59897e-05	0.00221408	1.62343
PSIP1	2.01939	8.97747	4.24099	5.6319e-05	0.00222538	1.61797
RP11-16K12.1	-1.74106	0.809773	-4.23936	5.66586e-05	0.00223541	1.61237
ATAD2	1.7258	7.79323	4.23935	5.66602e-05	0.00223541	1.61235
COPS5	1.0309	6.203	4.23762	5.7022e-05	0.00224795	1.60642
CTD-2135J3.3	-1.91142	1.49033	-4.23717	5.71152e-05	0.00224989	1.6049
STRADA	1.5121	6.0808	4.23421	5.77409e-05	0.00227279	1.59476
DNMT1	1.12373	8.76289	4.23333	5.79273e-05	0.00227837	1.59175
SORBS1	-1.31129	7.29723	-4.2329	5.80179e-05	0.00228018	1.5903
CCL3	-3.03938	2.46134	-4.23222	5.8164e-05	0.00228416	1.58796
RP11-664D7.4	-2.37297	1.29838	-4.23107	5.84107e-05	0.00229034	1.58402
CCHCR1	1.46029	6.47675	4.22886	5.88863e-05	0.00230662	1.57647
MAP3K6	-2.31064	5.74122	-4.22872	5.89163e-05	0.00230662	1.57599
ELL2	-2.60173	5.72492	-4.2267	5.93543e-05	0.00232199	1.5691
LAMB3	-3.65735	3.29159	-4.22643	5.94131e-05	0.00232252	1.56817
AQP4	-3.49765	3.61588	-4.22569	5.95749e-05	0.00232706	1.56564
CTD-2033D15.1	-3.18504	3.04829	-4.22524	5.9673e-05	0.00232912	1.56411
TSNARE1	2.01981	6.33776	4.22481	5.97677e-05	0.00233103	1.56263
FADS1	1.21223	7.92171	4.2227	6.02306e-05	0.00234441	1.55545
INIP	2.33225	4.05271	4.22262	6.02482e-05	0.00234441	1.55518
COLEC12	-3.26964	3.2874	-4.22113	6.05786e-05	0.00235531	1.55009
SRGN	-2.95069	3.06942	-4.22094	6.06206e-05	0.00235531	1.54944
ARAP2	-2.62311	5.03294	-4.22063	6.06886e-05	0.00235616	1.5484
ARHGDIB	-2.20004	5.92963	-4.22014	6.07981e-05	0.00235708	1.54672
DLEC1	-2.55518	4.83373	-4.22011	6.08045e-05	0.00235708	1.54662
PARVA	-1.47962	6.42616	-4.21892	6.10719e-05	0.00236566	1.54254
CASC5	1.41617	7.04467	4.21668	6.15732e-05	0.00238327	1.53493
RHOD	-1.47268	0.637161	-4.21597	6.17341e-05	0.00238769	1.5325
DKC1	1.44099	6.74405	4.21462	6.204e-05	0.00239771	1.5279
ZNF385B	-2.8726	3.98624	-4.21377	6.22339e-05	0.00240163	1.52499
EEF1A1P21	-1.25542	0.393853	-4.21376	6.22355e-05	0.00240163	1.52497
STAC3	2.38781	4.93316	4.21144	6.27675e-05	0.00241851	1.51705
SYDE1	-2.35517	3.05819	-4.21104	6.28596e-05	0.00242024	1.51568
ENO2	1.5616	8.28454	4.21055	6.29715e-05	0.00242272	1.51403
HDAC1	1.21432	6.86416	4.20976	6.31546e-05	0.0024255	1.51132
TACC2	-1.36206	8.01784	-4.20973	6.31606e-05	0.0024255	1.51124
MVP	-1.62294	6.20131	-4.20958	6.31965e-05	0.0024255	1.51071
RTKN2	-1.95574	5.9329	-4.2093	6.32603e-05	0.0024255	1.50977
SNF8	1.06482	6.20609	4.20921	6.3281e-05	0.0024255	1.50946
ADCY9	-1.01506	6.82053	-4.20768	6.36376e-05	0.00243734	1.50423
TRAJ37	-1.22149	0.370181	-4.20746	6.36878e-05	0.00243744	1.5035
P2RX1	-3.0982	2.41726	-4.20585	6.40648e-05	0.00244963	1.49801
MAPK8IP1	2.19089	6.23021	4.20569	6.4102e-05	0.00244963	1.49747
OR5P3	-1.4609	0.479359	-4.20537	6.41763e-05	0.00245063	1.49639
PDLIM2	-3.02022	3.32608	-4.20516	6.42256e-05	0.00245068	1.49567
F11	-2.29505	1.32579	-4.20435	6.44176e-05	0.00245435	1.4929
RP11-1C8.4	2.48059	4.73565	4.20183	6.5012e-05	0.00247515	1.48435
MYH11	-1.7337	7.86722	-4.2012	6.51636e-05	0.00247908	1.48218
RP11-815J21.2	-3.0841	5.44302	-4.20046	6.53392e-05	0.00248391	1.47968
RP11-145O15.3	-1.54669	0.457301	-4.20007	6.54333e-05	0.00248564	1.47834
KIF5C	2.69265	7.91867	4.1997	6.55223e-05	0.00248717	1.47707
NDEL1	-1.16789	6.77199	-4.19479	6.67074e-05	0.00253028	1.46039
TNFRSF1A	-2.10266	5.76671	-4.19428	6.68325e-05	0.00253314	1.45865
MIR29B2	-1.14759	0.387493	-4.19365	6.69854e-05	0.00253568	1.45652
RP11-334A14.5	-2.39465	1.1706	-4.1936	6.69986e-05	0.00253568	1.45634
SAMHD1	-1.97924	6.47175	-4.19293	6.71607e-05	0.00253994	1.45409
INMT	-2.32603	5.62029	-4.19262	6.72387e-05	0.00254101	1.45301
PARM1	-2.01193	5.942	-4.19232	6.73116e-05	0.00254188	1.452
GANC	-1.81144	6.04738	-4.18923	6.80753e-05	0.00256883	1.44151
CPEB4	-1.32292	7.06524	-4.18771	6.84541e-05	0.00258121	1.43634
AC068831.8	2.50481	5.75481	4.18653	6.875e-05	0.00258868	1.43233
STOM	-2.59738	6.03042	-4.18651	6.87534e-05	0.00258868	1.43229
PRSS8	-2.79308	3.77999	-4.18582	6.89274e-05	0.00259332	1.42993
NRXN1	2.88892	7.9644	4.18541	6.90296e-05	0.00259353	1.42856
TRPV2	-2.60449	3.30585	-4.18539	6.90345e-05	0.00259353	1.42849
TBC1D16	1.3211	8.41733	4.18134	7.00615e-05	0.00263019	1.41475
SULT1C4	-2.40531	2.76099	-4.18111	7.01203e-05	0.00263046	1.41397
HSPA12B	-2.75476	3.06239	-4.17896	7.06738e-05	0.00264928	1.40666
SCNN1B	-2.95271	2.79243	-4.17857	7.07741e-05	0.0026511	1.40534
MKNK2	-1.69847	7.31227	-4.17822	7.08635e-05	0.0026525	1.40416
RNF5	-1.51255	5.98242	-4.17761	7.10224e-05	0.00265651	1.40208
ABCA8	-2.49563	4.71909	-4.17708	7.11594e-05	0.00265969	1.40029
LHFPL5	2.04815	4.54675	4.17599	7.14425e-05	0.00266637	1.3966
MIR1260B	-2.19401	1.38151	-4.17028	7.29424e-05	0.00272036	1.37727
CCL18	-3.02415	2.11609	-4.16951	7.31479e-05	0.00272604	1.37465
GLIPR2	-2.15606	3.95692	-4.16912	7.32512e-05	0.0027279	1.37334
RP11-94C24.3	-2.00475	1.11207	-4.16856	7.34006e-05	0.00273147	1.37145
PTPN13	-2.26243	5.97287	-4.16704	7.38081e-05	0.00274158	1.3663
USP49	1.31009	6.88299	4.167	7.38193e-05	0.00274158	1.36616
ZNF3	1.1404	7.25771	4.16695	7.3833e-05	0.00274158	1.36598
RP11-182J1.16	-1.29137	0.570137	-4.16624	7.40236e-05	0.00274467	1.36359
SCAMP5	2.38861	6.51113	4.1627	7.49816e-05	0.00277617	1.35163
RP11-533O20.2	-2.13999	1.0624	-4.16173	7.52467e-05	0.00278396	1.34835
STRBP	1.06296	7.02349	4.16028	7.56461e-05	0.00279672	1.34342
RP11-715J22.4	2.96951	3.6701	4.15919	7.59453e-05	0.00280575	1.33975
UBE2T	2.82506	4.09651	4.15509	7.70845e-05	0.00284578	1.32591
RAMP2	-2.84308	3.35647	-4.15301	7.76698e-05	0.00286532	1.31888
AC005237.4	-1.99843	1.01313	-4.15187	7.79914e-05	0.00287511	1.31503
PHF21B	3.27129	4.86484	4.15055	7.83673e-05	0.00288689	1.31056
ASPM	2.0897	8.18951	4.14916	7.87637e-05	0.00289785	1.30587
C16orf85	2.42583	2.78249	4.14911	7.87783e-05	0.00289785	1.3057
MPZL2	-2.36148	3.83636	-4.14505	7.99461e-05	0.0029387	1.29202
CAPN8	-3.32102	3.65698	-4.14447	8.01152e-05	0.00294279	1.29006
IFT80	1.64723	5.72259	4.14287	8.05802e-05	0.00295775	1.28468
RP11-431M7.3	-1.60997	0.79016	-4.14251	8.06868e-05	0.00295954	1.28345
ACACB	-1.49316	6.88974	-4.14167	8.09334e-05	0.00296645	1.28061
KIF14	2.44506	5.94703	4.14067	8.1228e-05	0.00297512	1.27723
SH3BP5	-1.30923	6.59925	-4.13969	8.15145e-05	0.00298348	1.27396
AC093627.6	-1.22912	0.579847	-4.13935	8.1615e-05	0.00298502	1.27282
CXorf36	-2.16493	4.57169	-4.13899	8.17244e-05	0.00298688	1.27157
WWTR1-AS1	-2.70461	2.01595	-4.13742	8.21892e-05	0.00300172	1.2663
SASS6	2.19983	4.59669	4.13715	8.22705e-05	0.00300207	1.26538
RP11-318K15.2	-1.94789	0.897854	-4.13699	8.23162e-05	0.00300207	1.26487
RP11-524D16__A.3	-2.67277	2.23246	-4.13362	8.33284e-05	0.00303683	1.25351
RP11-191A15.1	-2.34881	1.29149	-4.13297	8.35235e-05	0.00304177	1.25133
IL27RA	-2.63701	2.69918	-4.13229	8.37317e-05	0.00304626	1.24902
GRASP	-2.19077	5.08157	-4.13217	8.37661e-05	0.00304626	1.24864
LAMA4	-1.9617	6.52809	-4.13036	8.43185e-05	0.00306417	1.24253
RP11-677M14.3	-2.61138	2.0551	-4.1296	8.4549e-05	0.00307037	1.23999
WWTR1-IT1	-1.94144	1.11699	-4.12886	8.4776e-05	0.00307642	1.2375
RP11-1100L3.8	-3.15524	5.37104	-4.12781	8.5101e-05	0.00308603	1.23394
KCNB2	2.443	6.66113	4.12744	8.52135e-05	0.00308792	1.23272
ADARB1	-1.89316	6.53284	-4.12656	8.54869e-05	0.00309348	1.22974
PLBD1	-2.39997	2.32949	-4.12655	8.54879e-05	0.00309348	1.22973
PRKG1	-2.52423	4.10444	-4.12545	8.58308e-05	0.00310369	1.22601
SLFNL1	1.78006	5.57288	4.12417	8.62281e-05	0.00311585	1.22172
ANLN	2.27809	6.54755	4.12355	8.64226e-05	0.00312067	1.21962
RP5-1091E12.1	-2.63108	2.76012	-4.12213	8.68669e-05	0.0031345	1.21486
LL0XNC01-116E7.2	2.30546	2.41793	4.121	8.7221e-05	0.00314506	1.21108
AC109333.10	-2.34367	1.70665	-4.12066	8.73303e-05	0.00314633	1.20992
E2F1	2.35816	6.51706	4.1204	8.74112e-05	0.00314633	1.20905
PDE4A	-3.08314	3.65929	-4.12028	8.74489e-05	0.00314633	1.20865
RP11-544L8__B.4	-1.55427	0.703954	-4.12011	8.75024e-05	0.00314633	1.20809
ARHGEF6	-2.29527	5.07853	-4.11949	8.76995e-05	0.00314821	1.206
RP11-122K13.7	-1.34571	0.580587	-4.11936	8.77394e-05	0.00314821	1.20557
C7	-3.27283	4.85755	-4.1173	8.8397e-05	0.00316958	1.19864
NRSN1	3.10258	4.51907	4.11657	8.8629e-05	0.00317529	1.1962
CYP51P3	-1.91432	1.08539	-4.11641	8.86804e-05	0.00317529	1.19566
CNPY2	1.54625	4.91113	4.11614	8.87689e-05	0.00317624	1.19473
HLA-DPB1	-2.43651	5.43102	-4.1158	8.88752e-05	0.00317652	1.19362
RP11-398K22.12	1.28804	6.86227	4.11545	8.89883e-05	0.00317652	1.19244
TTBK1	2.89625	5.50659	4.11534	8.90254e-05	0.00317652	1.19205
MIR27A	-1.89964	0.738803	-4.11505	8.91179e-05	0.00317761	1.19109
C4orf32	-2.36092	1.62055	-4.11351	8.96153e-05	0.00319312	1.18592
CD40	-2.51784	3.22242	-4.11269	8.98813e-05	0.00320036	1.18316
CBX3	1.30356	6.88492	4.10856	9.12314e-05	0.00324392	1.16931
SIRPA	-2.04647	4.86517	-4.10819	9.13541e-05	0.00324602	1.16807
NMNAT3	2.44961	4.73746	4.10717	9.16887e-05	0.00325565	1.16467
C1orf38	-2.45092	5.47656	-4.10647	9.19204e-05	0.00326161	1.16233
RAB11FIP4	1.54824	6.78534	4.10582	9.21367e-05	0.00326702	1.16014
ETV5-AS1	-2.04903	1.04036	-4.1051	9.23766e-05	0.00327028	1.15773
ZNF528	1.40883	6.54772	4.10501	9.24062e-05	0.00327028	1.15743
CNPY4	1.7519	4.95703	4.10497	9.24204e-05	0.00327028	1.15729
OVOL2	2.04503	4.7314	4.10444	9.25955e-05	0.00327421	1.15553
FANCA	1.41801	8.56449	4.10312	9.3038e-05	0.00328442	1.1511
ADAM22	2.01073	6.90252	4.10301	9.3077e-05	0.00328442	1.15071
LYPD6	2.77113	3.81651	4.10232	9.33081e-05	0.0032903	1.14841
PREX2	-2.65432	5.32217	-4.10082	9.38143e-05	0.00330408	1.14338
MMRN1	-2.59105	2.09945	-4.10078	9.38282e-05	0.00330408	1.14324
KIF1A	2.85926	9.91754	4.10012	9.40493e-05	0.00330959	1.14106
GMFG	-2.22817	1.38998	-4.09877	9.45096e-05	0.0033235	1.13652
WDR34	2.40514	6.39362	4.09788	9.48117e-05	0.00333148	1.13356
ECSCR	-2.44377	1.44397	-4.09772	9.48667e-05	0.00333148	1.13302
ATP11A	-1.14587	8.43904	-4.09715	9.50618e-05	0.00333604	1.13111
CGN	-1.74065	6.01556	-4.09617	9.5398e-05	0.00334554	1.12783
SMC4	1.52328	8.54359	4.09533	9.56876e-05	0.00335339	1.12502
ZBTB8B	2.43905	3.83364	4.09433	9.6033e-05	0.00336089	1.12167
PTGDR	-2.23531	1.44109	-4.09294	9.65151e-05	0.00337545	1.11702
PMP22	-2.74056	3.97481	-4.09156	9.69953e-05	0.00338993	1.11241
COL4A2-AS1	-2.66321	2.28042	-4.09083	9.72535e-05	0.00339663	1.10995
SPOCK2	-2.2172	6.6589	-4.09028	9.74432e-05	0.00340093	1.10814
MS4A7	-2.3196	4.68719	-4.08953	9.77067e-05	0.00340781	1.10563
S100A4	-2.68289	2.27653	-4.08926	9.78036e-05	0.00340886	1.10471
TXLNA	1.19706	7.81781	4.08838	9.81145e-05	0.00341737	1.10176
C20orf85	-2.15587	0.969266	-4.08632	9.88417e-05	0.00343801	1.0949
ARHGEF17	-1.6105	7.13595	-4.08546	9.91478e-05	0.00344626	1.09203
LYN	-2.73056	3.85711	-4.08528	9.92136e-05	0.00344626	1.09142
GNRHR2	1.42773	7.57959	4.085	9.93152e-05	0.00344745	1.09047
ATXN7	-1.06338	7.22621	-4.08269	0.000100143	0.00347381	1.08276
PCLO	1.69805	9.30135	4.08248	0.000100219	0.00347409	1.08206
FSD2	2.09669	3.45732	4.08219	0.000100322	0.0034753	1.0811
SSPN	-2.64531	2.43696	-4.08137	0.00010062	0.00348329	1.07834
ARL17A	1.02491	8.29321	4.08104	0.000100738	0.003485	1.07726
FAM129B	-1.18406	7.45674	-4.08083	0.000100816	0.00348534	1.07654
RP11-545N8.3	-2.59068	3.08746	-4.08003	0.000101105	0.00348812	1.07389
COL22A1	3.52569	6.32953	4.07996	0.000101129	0.00348812	1.07366
RILPL2	-2.44384	2.49911	-4.07993	0.000101139	0.00348812	1.07357
ATF7IP2	-2.56762	4.25216	-4.07985	0.000101169	0.00348812	1.07329
AC011498.2	2.20292	2.86364	4.07966	0.000101239	0.00348819	1.07265
PGBD5	2.25506	5.41597	4.07636	0.000102448	0.00352507	1.06164
PAG1	-1.71455	5.22445	-4.07513	0.0001029	0.00353641	1.05755
ITGAX	-2.40008	5.79104	-4.07251	0.000103873	0.00356691	1.04881
RECQL4	3.04423	6.24267	4.06936	0.000105056	0.00360512	1.0383
PLEKHF1	-2.02159	1.26191	-4.06873	0.000105291	0.00361074	1.03623
ADAMTS9-AS2	-2.60232	3.41617	-4.06563	0.000106469	0.00364869	1.0259
TLCD2	-1.58655	0.659069	-4.06464	0.000106849	0.00365928	1.02259
GAD1	2.03353	5.92718	4.06439	0.000106946	0.00366014	1.02175
ITPK1-AS1	2.32922	3.7428	4.06414	0.000107039	0.00366089	1.02094
RP11-480I12.5	2.69918	4.18799	4.06295	0.000107497	0.0036741	1.01697
SLCO4A1	-2.69757	4.12801	-4.0623	0.00010775	0.00368027	1.0148
RP11-324O2.3	-1.87686	1.0155	-4.06111	0.000108208	0.00369106	1.01086
FAM183A	2.92807	4.64936	4.06111	0.00010821	0.00369106	1.01084
AC009113.1	2.59026	3.00291	4.05935	0.000108895	0.00371194	1.00499
MSR1	-2.50945	4.62828	-4.05838	0.000109273	0.00372234	1.00177
RP11-158M2.2	-2.38707	3.05879	-4.05776	0.000109517	0.00372449	0.999702
RP11-129B22.6	-2.41904	1.30654	-4.05767	0.000109551	0.00372449	0.999416
LINGO1	3.1531	4.12196	4.05766	0.000109554	0.00372449	0.999384
CRMP1	1.4934	7.76257	4.05741	0.000109653	0.00372535	0.998551
LRRC45	2.16078	5.45848	4.05687	0.000109869	0.00372708	0.996725
SPTBN4	2.92095	4.84247	4.05673	0.000109922	0.00372708	0.996274
ZC3H12A	-2.73987	4.13805	-4.05422	0.000110917	0.00375581	0.987917
TRANK1	-1.58015	6.59666	-4.05328	0.00011129	0.00376597	0.984796
MMP2	-2.37533	6.26836	-4.05183	0.000111867	0.00378101	0.98
RNF214	1.01265	6.9196	4.05179	0.000111883	0.00378101	0.97987
KCNJ1	-1.79642	0.989133	-4.05045	0.00011242	0.00379667	0.975422
BRI3	-1.13152	5.85257	-4.05004	0.000112589	0.00379816	0.974033
PAX5	2.41593	6.72506	4.04988	0.000112651	0.00379816	0.973517
TFAP2A	2.08169	6.10473	4.04979	0.000112687	0.00379816	0.973221
AC105402.4	2.77965	3.04161	4.04954	0.000112791	0.00379914	0.97237
GPR61	2.54978	2.7549	4.04807	0.000113382	0.00381153	0.967518
FAT4	-2.51463	6.04404	-4.04784	0.000113476	0.00381217	0.966752
PLA1A	-2.0378	1.29828	-4.0475	0.000113617	0.00381264	0.965601
MEIS3P1	-1.93296	0.891295	-4.04744	0.000113639	0.00381264	0.96542
MMP7	-1.85697	0.972996	-4.04437	0.000114895	0.00385226	0.95522
LINC00315	-2.00654	1.09493	-4.04331	0.00011533	0.00386242	0.951714
IFITM3	-2.86173	5.57247	-4.04326	0.000115349	0.00386242	0.951559
SOSTDC1	-2.03933	0.837397	-4.04145	0.000116101	0.00388506	0.945532
TPD52	2.29156	7.08144	4.04048	0.000116502	0.00389536	0.942332
RP11-325F22.2	-2.88637	2.15282	-4.04034	0.000116561	0.00389536	0.941862
THSD1	-2.40347	2.13075	-4.03876	0.000117223	0.00391492	0.936609
MMRN2	-2.24321	3.71932	-4.03641	0.000118209	0.00394466	0.92884
LILRB5	-2.91148	3.31796	-4.03627	0.000118268	0.00394466	0.928379
PCDH1	-1.9732	5.90799	-4.03454	0.000119003	0.0039665	0.922631
VWA3A	-2.89331	3.17466	-4.03436	0.000119078	0.0039665	0.922048
TGFB1	-2.23804	4.96213	-4.03313	0.000119602	0.00397876	0.917976
CTSE	-3.56409	2.81135	-4.0322	0.000120001	0.00398944	0.914888
CHP1	-1.81012	6.02432	-4.03167	0.000120229	0.00399397	0.913128
TIPARP	-1.79765	6.00226	-4.03152	0.000120293	0.00399397	0.912629
TCTEX1D4	-2.86576	2.14052	-4.02975	0.000121056	0.00401408	0.906767
LCN12	2.65922	3.99416	4.02893	0.00012141	0.00402321	0.904059
CYP2B6	-3.17182	1.96104	-4.02874	0.000121492	0.00402332	0.903433
CRLF3	1.01552	7.04211	4.02833	0.00012167	0.00402662	0.902073
HPCAL1	-1.33983	6.57232	-4.02788	0.000121865	0.00403044	0.900593
GATA2	-2.72583	3.45089	-4.02491	0.000123164	0.00407079	0.890755
FHL1	-2.72579	5.66031	-4.02313	0.000123946	0.00409399	0.884885
MCM6	2.12362	6.3046	4.02227	0.000124326	0.0041039	0.882046
H6PD	-1.41245	6.90999	-4.02185	0.000124512	0.00410627	0.880661
RP11-310E22.4	-2.26716	1.17146	-4.02175	0.000124559	0.00410627	0.880313
SLCO2B1	-2.04076	6.49536	-4.02115	0.000124823	0.00411232	0.878349
MICA	-2.78034	3.29372	-4.01923	0.000125683	0.00413799	0.871983
DDR2	-2.51238	3.95113	-4.01707	0.000126652	0.00416719	0.864865
TINAGL1	-2.79026	4.04761	-4.01682	0.000126765	0.00416824	0.864035
LGALS1	-2.49734	3.99882	-4.01605	0.000127112	0.00417429	0.8615
NCR3LG1	1.89644	5.33275	4.01575	0.000127251	0.00417616	0.860489
ZNF543	1.32463	5.48228	4.01526	0.00012747	0.00418068	0.85889
LHX2	2.93754	4.6831	4.01502	0.000127581	0.00418163	0.858086
PARP4	-1.2255	6.62515	-4.01401	0.000128043	0.00419408	0.854734
RP11-903H12.3	-2.30424	1.24053	-4.01301	0.000128496	0.00420624	0.851457
PRSS23	-1.51827	5.88831	-4.01272	0.000128629	0.0042079	0.850498
RPS12P5	-1.9596	0.751987	-4.01239	0.00012878	0.00421015	0.84941
FAM57B	3.1263	5.48831	4.01151	0.000129184	0.00422064	0.84651
TNS3	-1.55589	7.82213	-4.01057	0.000129619	0.00423216	0.84339
CST3	-1.45053	5.93157	-4.00952	0.000130104	0.00424258	0.839928
ST13P2	-1.32907	0.634726	-4.00929	0.000130209	0.00424329	0.839182
AC004049.2	-2.01492	1.2485	-4.00849	0.000130583	0.0042505	0.836522
RP11-433J22.2	-2.3436	1.38611	-4.00846	0.000130597	0.0042505	0.836426
C5orf58	-2.22835	1.92784	-4.00817	0.000130728	0.00425207	0.835494
MELK	2.19372	5.54136	4.00788	0.000130864	0.00425378	0.834531
VGF	2.88816	2.95387	4.00742	0.000131081	0.00425551	0.832995
GATA5	-1.21622	0.517509	-4.00741	0.000131083	0.00425551	0.832978
TPST2	-1.84574	4.30501	-4.00701	0.00013127	0.00425873	0.831661
SOX7	-2.8133	2.41499	-4.00684	0.000131349	0.00425873	0.831099
C5AR1	-2.78819	3.5281	-4.00589	0.000131795	0.00427047	0.827959
LBH	-2.1185	4.69767	-4.00566	0.000131902	0.00427122	0.827209
ARID5A	-2.54426	4.55445	-4.00429	0.000132549	0.00428946	0.822673
AC010336.1	2.41647	8.48143	4.00107	0.000134071	0.00433599	0.812086
LGALS3	-1.78026	5.28838	-3.99869	0.000135209	0.00437003	0.804252
USP53	-1.78292	6.30195	-3.99657	0.000136233	0.00439477	0.797263
NKG7	-2.46316	1.63086	-3.99508	0.000136954	0.00441527	0.792366
RP11-46D6.1	-1.7578	0.942979	-3.99426	0.000137356	0.00442544	0.78965
BCL6B	-2.6094	3.71153	-3.99182	0.000138552	0.00446115	0.781618
DKK3	-2.20502	4.80044	-3.99163	0.000138645	0.00446133	0.780998
LINC00612	-1.50724	0.707823	-3.99089	0.000139007	0.00447018	0.778578
GNLY	-2.84991	2.64802	-3.98991	0.000139494	0.004483	0.775341
MRC2	-2.21619	6.00288	-3.9892	0.000139845	0.00449148	0.773008
NPC1	-1.35263	6.00429	-3.98715	0.000140866	0.00452143	0.766267
HIPK3	-1.21901	7.48834	-3.98639	0.000141243	0.00453069	0.76379
RP11-318C2.1	-2.40089	2.19652	-3.98554	0.00014167	0.00454152	0.760997
DOK2	-2.88926	2.64174	-3.98503	0.000141927	0.0045469	0.759318
NPR3	-2.76584	3.18425	-3.98407	0.000142412	0.00455959	0.756156
HEYL	-1.94165	5.68895	-3.98385	0.00014252	0.00456021	0.755451
CLEC10A	-2.12383	1.11639	-3.98141	0.000143761	0.00459238	0.747421
LYVE1	-2.80191	2.47523	-3.98035	0.000144303	0.00460571	0.743935
ELOVL2	2.34623	5.39928	3.97988	0.00014454	0.0046104	0.742414
TREH	-1.37891	5.72906	-3.97854	0.000145231	0.00462956	0.737994
HSPG2	-1.36927	8.95915	-3.97831	0.00014535	0.00463045	0.737238
RP11-262H14.1	1.87443	6.11389	3.9763	0.000146384	0.00466051	0.730667
HDC	-2.79306	2.15082	-3.97562	0.000146741	0.00466895	0.728413
RP11-3B12.1	2.03649	4.11626	3.97541	0.000146846	0.0046694	0.727748
RP11-573E11.2	-1.07503	0.425711	-3.97415	0.000147502	0.00468735	0.723619
MIR645	-1.93239	1.11267	-3.97359	0.000147797	0.00469378	0.721773
EOGT	-2.3221	4.22355	-3.97253	0.000148351	0.00470847	0.718304
FAM111B	3.0867	6.2695	3.97195	0.000148656	0.00471521	0.716403
CCNE2	1.90337	6.15676	3.97173	0.000148772	0.00471596	0.715681
CASP1	-2.29317	2.67511	-3.9709	0.000149213	0.00472701	0.71294
CD300LF	-2.29376	2.16406	-3.96987	0.000149757	0.00474131	0.709568
EMR3	-2.57117	1.20737	-3.96932	0.000150049	0.00474754	0.70776
DUOXA2	-2.77822	2.51566	-3.96915	0.000150139	0.00474754	0.707206
ZNF670	2.22287	3.33081	3.96851	0.000150478	0.00475532	0.705116
CLSTN2	2.55503	6.18795	3.96802	0.000150739	0.00476062	0.703511
HNF1B	-2.99879	2.52002	-3.96782	0.000150847	0.00476109	0.702848
RP11-165H20.1	-2.02048	1.07774	-3.9675	0.000151019	0.00476356	0.701796
RP11-1008C21.2	-1.3336	0.623525	-3.96724	0.000151156	0.00476494	0.700956
PHLDB2	-1.85171	6.04257	-3.96603	0.000151801	0.00478012	0.697008
RP4-565E6.1	2.44849	4.19733	3.96583	0.000151912	0.00478012	0.696335
RP11-998D10.2	-2.73569	2.91639	-3.96573	0.000151962	0.00478012	0.696027
ELMO1	-1.8599	6.3503	-3.96564	0.000152011	0.00478012	0.695729
RP11-264C15.2	2.34304	3.43147	3.96479	0.000152471	0.00479164	0.692931
PAFAH1B3	2.41938	4.64892	3.96457	0.000152591	0.00479245	0.692205
CREB3L4	1.69108	5.37894	3.96379	0.000153012	0.0047998	0.68965
RP11-680F20.10	2.82117	3.03606	3.96104	0.000154504	0.00484066	0.680663
RP11-435D7.3	3.04005	4.1144	3.95909	0.000155574	0.0048682	0.674274
C11orf21	-2.70177	2.27736	-3.95816	0.000156087	0.00487561	0.671228
GDAP1	2.00712	6.2393	3.9581	0.000156116	0.00487561	0.671053
EHD4	-1.99761	4.68459	-3.9578	0.00015628	0.00487561	0.670081
RP1	-3.06492	2.61824	-3.95779	0.000156287	0.00487561	0.670037
UBE2C	2.25944	5.03094	3.95738	0.000156513	0.00487968	0.6687
RBMS2P1	-1.2306	0.703679	-3.95708	0.000156678	0.00488185	0.667724
GRIFIN	-1.69768	0.944036	-3.9565	0.000156999	0.00488887	0.665828
RP11-710A11.2	-1.18729	0.538728	-3.95631	0.000157104	0.00488917	0.665208
CD151	-1.59838	6.08691	-3.95567	0.000157461	0.00489727	0.663112
AC011742.3	-1.18088	0.509031	-3.95357	0.000158633	0.00492775	0.65624
RP11-124N14.3	-3.20574	4.96916	-3.95245	0.00015926	0.0049442	0.652593
NUDC	1.21427	6.59962	3.95152	0.000159783	0.00495746	0.649552
PXDC1	-2.36989	4.38053	-3.95117	0.000159981	0.00496056	0.648411
SHE	-2.89143	3.49141	-3.95048	0.000160372	0.0049697	0.646146
PRKDC	1.17427	9.96904	3.94956	0.000160891	0.00498027	0.643156
ANXA2	-1.64055	7.17038	-3.94916	0.000161122	0.00498387	0.641828
VAMP5	-2.31006	1.4386	-3.94896	0.000161234	0.00498431	0.641185
OASL	-2.15173	1.34683	-3.94765	0.000161981	0.00500439	0.636903
PLCB2	-2.37189	5.42858	-3.94658	0.000162595	0.00501789	0.6334
RLIMP1	-2.53831	3.18321	-3.94654	0.000162615	0.00501789	0.633291
LINC00476	1.35503	5.30722	3.94632	0.00016274	0.00501874	0.632576
AC018816.3	-2.24171	1.71333	-3.94536	0.000163296	0.00503285	0.629419
RP11-254F19.2	-1.97972	1.10321	-3.94502	0.000163488	0.0050334	0.628334
RP11-101E7.2	-1.65409	1.00331	-3.94498	0.000163511	0.0050334	0.628202
PTPRH	3.17373	3.25424	3.94354	0.000164345	0.00505324	0.623492
RP11-144L2.1	-2.01593	1.39282	-3.94353	0.000164353	0.00505324	0.623446
TMEM133	-2.3064	1.53611	-3.94261	0.000164881	0.00506644	0.620476
PHF15	-1.6224	5.79599	-3.94215	0.000165154	0.00506996	0.618949
RP11-1145L24.1	2.69201	2.72887	3.94208	0.000165194	0.00506996	0.61872
ZDHHC7	-1.14676	5.7542	-3.94169	0.000165421	0.00507345	0.617452
CISH	-2.63921	3.55201	-3.94154	0.000165507	0.00507345	0.616972
TSHZ2	1.18578	7.01497	3.93998	0.000166418	0.00509387	0.61189
TOP2A	2.37894	8.37684	3.93997	0.000166425	0.00509387	0.611852
CASP10	-1.88142	5.20076	-3.93988	0.000166479	0.00509387	0.611549
RP11-626G11.3	-2.3629	3.1876	-3.93972	0.000166571	0.00509387	0.611037
EML5	1.55109	7.01278	3.93833	0.000167391	0.00511589	0.606491
HSD17B4	-1.19616	6.11817	-3.93672	0.000168337	0.00514173	0.601274
SLC9A3R2	-1.96619	5.13657	-3.93476	0.000169505	0.00517429	0.594878
CCIN	-1.05759	0.442604	-3.93429	0.000169784	0.00517973	0.593354
CCDC68	-2.6834	2.26614	-3.93372	0.000170124	0.00518702	0.5915
BHLHE40	-2.43585	6.51403	-3.93183	0.000171259	0.00521851	0.585347
TXNIP	-1.90842	8.42612	-3.93086	0.000171846	0.00523327	0.582181
SHMT2	1.83971	6.50487	3.93039	0.000172128	0.00523874	0.580663
PTPRG	-1.2695	7.52188	-3.93	0.000172366	0.00523981	0.579383
RP11-441F2.1	2.88169	2.94934	3.93	0.000172368	0.00523981	0.579374
BRCA1	1.45339	6.87337	3.92904	0.000172952	0.00525444	0.576243
LONRF3	-2.90696	3.40684	-3.9286	0.000173218	0.00525939	0.574823
RP11-388P9.2	-2.14707	2.76482	-3.92653	0.000174485	0.00529162	0.568076
C5orf62	-2.62939	3.08542	-3.92418	0.000175928	0.005329	0.56046
CACNA1B	2.92388	7.0968	3.92344	0.000176387	0.00533975	0.558047
FCGR1A	-2.22779	1.57702	-3.92306	0.000176623	0.00534372	0.556811
RP11-923I11.3	2.63461	2.96563	3.92246	0.000176995	0.00535182	0.554863
MME-AS1	-1.47458	0.66315	-3.92134	0.000177694	0.00536978	0.551215
CREB3L1	-2.84084	4.22527	-3.91992	0.000178581	0.00539339	0.546609
CSMD2	3.51686	6.72782	3.91762	0.00018003	0.00543396	0.53913
PHACTR2	-1.92939	6.09891	-3.91663	0.000180655	0.00544906	0.535927
CLGN	2.51137	4.3051	3.91645	0.000180773	0.00544906	0.535322
FCER1G	-2.80517	3.0281	-3.91632	0.00018085	0.00544906	0.534926
PHGDH	2.27409	5.6798	3.91474	0.000181859	0.00547624	0.529777
GLS2	1.80088	5.016	3.91432	0.000182128	0.00548089	0.528412
FLI1	-1.77798	5.88139	-3.91405	0.000182301	0.00548089	0.527534
CELSR1	-2.14587	6.44864	-3.91399	0.000182336	0.00548089	0.527359
RP11-815J21.1	-2.80814	2.71353	-3.91353	0.000182629	0.00548327	0.525871
GBP4	-1.83655	5.96131	-3.91323	0.000182824	0.00548554	0.524884
FLNA	-1.13438	9.96638	-3.91299	0.000182979	0.00548554	0.524101
TIAM1	1.26124	7.64959	3.91279	0.000183109	0.00548554	0.523443
BTBD19	-1.82969	5.4514	-3.91275	0.000183134	0.00548554	0.523318
LTBP4	-2.41762	6.61713	-3.91134	0.000184039	0.00550941	0.518759
EFNA1	-2.64934	3.84966	-3.91024	0.000184749	0.00552524	0.515194
FYCO1	-1.41458	6.38307	-3.91019	0.000184783	0.00552524	0.515023
GUSBP8	2.09537	4.06955	3.90942	0.000185283	0.00553556	0.512522
IL1R1	-2.78772	5.6753	-3.90932	0.000185345	0.00553556	0.512215
SELP	-2.57105	2.34732	-3.90847	0.000185902	0.00554895	0.50944
RGS17	2.64802	3.91563	3.90795	0.000186239	0.00555576	0.507766
GRK4	1.44486	4.77412	3.90626	0.000187344	0.00557249	0.502292
HJURP	2.33599	5.89995	3.90626	0.000187344	0.00557249	0.502291
HCN3	2.07494	6.01231	3.90493	0.00018822	0.00559328	0.497977
EHMT2	1.00992	7.71074	3.90487	0.000188262	0.00559328	0.49777
KIF24	2.28095	6.32703	3.90437	0.000188592	0.00559982	0.496153
PPFIBP1	-1.79563	6.32895	-3.90396	0.000188859	0.00560451	0.494841
CMAHP	-2.42403	5.17658	-3.90293	0.000189544	0.00562157	0.491494
AC002064.4	-1.70948	1.0209	-3.90159	0.000190434	0.0056447	0.48716
BTG2	-1.53222	7.56595	-3.90064	0.000191068	0.005658	0.484087
PAICS	1.13531	6.79953	3.89952	0.000191822	0.00567597	0.480443
AP000936.1	-1.86245	1.47762	-3.89893	0.000192219	0.00568114	0.478532
TNFSF12	-2.56425	3.09985	-3.89873	0.00019235	0.00568171	0.477904
RHOC	-1.69363	5.04867	-3.89841	0.000192565	0.00568478	0.476871
MAST1	2.29097	6.94922	3.89802	0.000192831	0.00568935	0.475594
RP11-213H15.1	-1.05539	0.424476	-3.89691	0.000193581	0.00570817	0.472006
FAS	-2.42981	3.31621	-3.89359	0.000195842	0.00577153	0.461266
LRRC16B	2.01462	6.35221	3.89275	0.000196418	0.00577773	0.458552
DAB2IP	-1.12351	7.25523	-3.89269	0.000196458	0.00577773	0.458365
MAD2L1	2.73558	3.24819	3.89262	0.000196504	0.00577773	0.458144
RFTN1	-1.28062	6.00285	-3.89219	0.000196802	0.00578315	0.456745
B3GALT5	3.0978	4.354	3.89186	0.000197028	0.00578387	0.455684
ACTR6	2.28741	3.64999	3.89177	0.000197089	0.00578387	0.455396
SNED1	-1.41841	7.05898	-3.88935	0.000198768	0.00582419	0.447553
C8orf4	-3.42222	4.34873	-3.88766	0.000199946	0.00585536	0.442089
VASH2	2.16684	5.00113	3.88743	0.000200106	0.00585573	0.441351
AC060834.2	-1.08261	0.331373	-3.88731	0.000200188	0.00585573	0.440972
TRPC6	-2.56614	2.91065	-3.88504	0.000201779	0.00589551	0.433656
POR	-1.04465	6.08101	-3.88454	0.000202135	0.00590256	0.432023
RASGRP2	-2.54937	3.72456	-3.88432	0.000202293	0.00590378	0.431304
EPHX1	-1.50248	5.73533	-3.88399	0.000202524	0.00590669	0.430248
PSD	1.71294	6.26565	3.8837	0.000202729	0.00590669	0.429311
MYL12A	-2.11895	5.04786	-3.88368	0.000202739	0.00590669	0.429267
FAM65A	-1.23994	7.4232	-3.88287	0.000203313	0.00591669	0.426651
ARHGAP29	-2.12772	5.93675	-3.88137	0.000204385	0.0059411	0.421792
NDUFA4L2	1.92969	6.17261	3.88027	0.000205172	0.00595727	0.41824
ST5	-1.07169	7.35251	-3.88026	0.000205174	0.00595727	0.418229
WFDC10B	-1.83901	0.850191	-3.87998	0.000205377	0.00595979	0.417314
FERMT2	-1.58956	6.0286	-3.87826	0.000206617	0.00599237	0.41175
ERP27	-2.35936	1.87069	-3.87689	0.000207601	0.00601749	0.407359
RP11-297C4.1	-2.05595	1.28261	-3.87509	0.000208912	0.00604864	0.401539
CTD-2258A20.4	-1.29654	0.5514	-3.87443	0.000209392	0.00605911	0.399418
SYT15	-1.76792	4.95756	-3.87347	0.000210092	0.00607437	0.396336
FAM176C	-2.03818	4.77332	-3.87338	0.000210157	0.00607437	0.396048
RP11-56A10.1	-1.96679	0.91955	-3.87294	0.000210483	0.00608033	0.394618
RP11-544I20.2	2.25227	2.74654	3.87199	0.000211185	0.00609717	0.391541
BCL9L	-1.37615	7.20944	-3.87169	0.000211401	0.00609998	0.390594
STAG3	1.23781	7.87022	3.87141	0.000211611	0.00610111	0.389678
ACAP2	1.55296	7.49654	3.87131	0.000211679	0.00610111	0.389379
GAS2L1	-2.49103	2.87678	-3.87073	0.000212114	0.00611019	0.387485
GIMAP1	-2.47239	2.45787	-3.87024	0.000212475	0.0061138	0.385909
ZIC2	3.79914	6.6703	3.87011	0.000212571	0.0061138	0.385495
AMOTL2	-1.95071	5.60436	-3.87007	0.000212598	0.0061138	0.385378
CD44	-2.09479	6.96569	-3.86974	0.000212844	0.00611744	0.384308
REL	-1.99522	5.01509	-3.86784	0.00021426	0.00615469	0.378179
CRIP3	2.71785	2.94495	3.86715	0.00021477	0.00616587	0.375982
ZEB2-AS1	-2.45361	3.28879	-3.86426	0.000216943	0.00622475	0.366681
HLA-DOA	-2.68668	3.87613	-3.86169	0.000218891	0.00627714	0.358419
C3AR1	-2.13448	1.8785	-3.86142	0.000219099	0.00627956	0.357545
PDLIM3	-2.31253	6.00058	-3.86122	0.000219251	0.0062804	0.356904
SLC7A14	2.75096	4.9353	3.8598	0.000220339	0.00630803	0.352329
CDT1	1.67025	5.3191	3.8591	0.000220875	0.00631985	0.350083
PCNT	1.14146	8.67427	3.85818	0.000221585	0.00633308	0.347117
USP37	1.25679	6.90281	3.85773	0.000221931	0.00633351	0.345677
IL20RA	-2.57142	1.93948	-3.85769	0.000221958	0.00633351	0.345563
MYO1B	-1.11473	7.29544	-3.85756	0.000222061	0.00633351	0.345137
RP11-632K5.5	2.15035	3.19871	3.85752	0.000222096	0.00633351	0.344991
KHDRBS2	-2.50985	1.74402	-3.85705	0.000222459	0.00633754	0.343482
CLSPN	1.81044	7.20844	3.85701	0.000222485	0.00633754	0.343373
RMI2	2.20372	3.93339	3.85613	0.000223168	0.00635347	0.34054
TUBA3D	2.42284	2.71834	3.85577	0.000223446	0.00635646	0.339392
LAMA2	-2.59377	5.52074	-3.85567	0.000223522	0.00635646	0.339077
DES	-3.44522	3.21042	-3.85514	0.000223941	0.00636186	0.337346
AC096670.3	-2.29884	2.68892	-3.85511	0.000223964	0.00636186	0.337252
PAQR5	-2.35486	3.17593	-3.85495	0.000224085	0.00636186	0.336752
CTD-3051D23.4	3.56869	3.7361	3.85476	0.000224234	0.00636256	0.336138
STAB1	-1.73826	6.94721	-3.85296	0.000225643	0.00639897	0.330354
NKD2	-2.68587	3.88016	-3.85249	0.000226007	0.00640575	0.328863
PML	-1.14703	6.98465	-3.8522	0.000226237	0.00640871	0.327925
CST7	-2.27623	2.21156	-3.85129	0.000226956	0.00642196	0.324993
GFPT2	-2.82283	3.28076	-3.85091	0.000227254	0.00642685	0.32378
RP11-96D1.7	-1.94646	1.22104	-3.84962	0.000228275	0.00645215	0.319639
RP11-492E3.1	-2.11422	5.76969	-3.84803	0.000229535	0.00648418	0.314555
AC003102.3	2.4964	2.42408	3.84621	0.000230996	0.00652185	0.308694
MBL1P	-2.76543	3.63376	-3.84349	0.000233186	0.00658003	0.299981
RP1-29C18.8	-2.46178	2.24096	-3.84222	0.000234215	0.00660544	0.295913
GNAO1	2.78237	7.74306	3.84136	0.000234915	0.00662151	0.293159
IFI27L1	1.90737	3.99933	3.84087	0.000235313	0.00662909	0.291594
COL6A2	-1.95432	7.05843	-3.84053	0.000235595	0.00663257	0.290488
POLE2	1.88161	4.78212	3.8404	0.000235696	0.00663257	0.290092
MGAT5B	2.26756	5.90318	3.8395	0.000236438	0.00664979	0.287189
NETO2	1.24329	6.4732	3.83757	0.000238021	0.00668571	0.281027
EZR	-1.01502	8.35596	-3.83747	0.000238107	0.00668571	0.280692
AP000251.2	2.3475	2.8641	3.83526	0.000239935	0.00673333	0.273631
FBXL16	2.28369	5.61907	3.83482	0.000240303	0.00673994	0.272218
AC010680.1	-2.48342	1.99871	-3.83397	0.000241008	0.00675601	0.269513
RN5-8S6	-2.46422	1.83415	-3.83367	0.000241262	0.00675944	0.268538
RP11-701P16.2	-2.41579	1.65128	-3.83249	0.000242253	0.00678348	0.264754
ATXN1	-1.71238	6.16876	-3.83162	0.000242984	0.00679774	0.261971
SCTR	-2.86174	2.19762	-3.83156	0.000243028	0.00679774	0.261805
DISP2	2.58621	4.26602	3.83106	0.000243448	0.00680535	0.260209
ETS1	-1.57926	7.23459	-3.82973	0.000244579	0.00682992	0.25593
UBA7	-2.15548	5.74375	-3.82868	0.000245465	0.0068509	0.252594
CTNNB1	-1.17732	7.56618	-3.82768	0.000246321	0.00687106	0.249377
PDGFA	-2.27886	4.01608	-3.82432	0.000249201	0.0069476	0.238647
ACO2	-1.25227	6.84677	-3.82258	0.000250702	0.00698182	0.233105
B4GALT2	1.73026	5.84338	3.82198	0.000251226	0.00699263	0.231175
LCP1	-2.07909	5.80349	-3.82065	0.000252385	0.00702104	0.226929
FLAD1	1.53505	5.73238	3.82032	0.000252669	0.00702512	0.225891
RP11-39K24.4	-2.21638	2.45129	-3.81983	0.000253097	0.00703322	0.224326
MATK	-2.47722	1.45647	-3.81948	0.000253403	0.00703788	0.223213
ESYT3	-1.67114	5.83658	-3.81925	0.000253606	0.00703969	0.222474
NRG1-IT1	3.35179	4.47144	3.81775	0.000254928	0.00706872	0.217674
SPN	-2.71547	4.06512	-3.81646	0.000256064	0.00709636	0.213571
RP11-1023L17.2	1.78418	7.29334	3.8154	0.000257007	0.00711479	0.210178
ZNF226	1.84882	4.94069	3.81495	0.000257405	0.00711878	0.208749
RP11-856B14.1	2.28855	3.06349	3.81444	0.000257856	0.00711938	0.207133
CAPN3	-2.22341	2.14269	-3.81435	0.000257941	0.00711938	0.20683
ANPEP	-2.9969	3.73151	-3.81423	0.000258046	0.00711938	0.206455
LRRC25	-2.14498	1.78189	-3.81413	0.000258136	0.00711938	0.206133
RAB20	-2.38555	1.98063	-3.81406	0.000258195	0.00711938	0.20592
SWAP70	-1.48425	5.92042	-3.81396	0.000258287	0.00711938	0.205594
CELF2	-1.81927	6.8212	-3.81364	0.000258569	0.00712208	0.204586
AC099048.1	-1.33804	0.663295	-3.81313	0.000259024	0.00712818	0.202962
RP11-256L6.2	-1.91223	1.60878	-3.81222	0.000259844	0.00714691	0.200044
CCND2	-1.83291	6.18991	-3.81188	0.000260148	0.00715141	0.198967
RP11-864G5.3	-2.45935	1.80164	-3.81071	0.000261195	0.00717633	0.195261
ADCY4	-1.86339	5.60821	-3.81054	0.000261353	0.00717682	0.194703
RP11-47G11.2	-1.22193	0.607648	-3.8085	0.000263196	0.00721968	0.188217
TMEM183A	1.40643	6.18563	3.80795	0.000263697	0.00722954	0.186462
LEPREL1	-2.8359	3.69747	-3.80747	0.000264137	0.00723209	0.184924
DIO3OS	-3.17236	2.53027	-3.80744	0.000264164	0.00723209	0.18483
TROAP	1.72891	6.68976	3.80738	0.000264214	0.00723209	0.184653
RP11-439L18.2	-1.89954	1.33738	-3.80625	0.000265247	0.00725646	0.181056
RP11-176D17.3	-1.29485	0.684314	-3.80608	0.000265408	0.00725699	0.180495
ZBTB38	-1.42236	6.96775	-3.80565	0.000265803	0.00726003	0.179122
GHR	-2.49847	2.57185	-3.80411	0.000267219	0.00729092	0.174219
CTD-3138F19.1	-1.21726	0.383415	-3.8032	0.000268053	0.00730587	0.171345
ZFP36L2	-1.86641	6.41671	-3.80207	0.000269105	0.00733063	0.167732
EFEMP1	-2.405	4.45747	-3.80187	0.000269284	0.00733162	0.167116
GPD1L	-2.19287	4.03758	-3.80116	0.000269944	0.00734566	0.16486
AC012123.1	3.31724	4.14367	3.80027	0.000270775	0.00736267	0.162022
FSD1	2.79755	4.02158	3.80018	0.000270857	0.00736267	0.161744
CTD-2215L10.1	-2.48526	2.20013	-3.79946	0.000271532	0.00737326	0.159447
DHRS11	2.13293	4.04318	3.7993	0.000271679	0.00737326	0.158947
RP11-109P14.9	2.55902	4.6588	3.79913	0.000271845	0.00737385	0.158384
C10orf47	-1.99342	1.40656	-3.79856	0.000272374	0.00738428	0.156591
CPA3	-2.40779	1.70291	-3.7979	0.000272993	0.00739714	0.154497
C21orf58	2.53101	6.69966	3.79733	0.000273535	0.00740791	0.152666
WASF1	1.95758	6.27545	3.79684	0.000273995	0.00741642	0.151118
AC017006.2	-2.10415	1.52071	-3.79586	0.000274923	0.0074376	0.147999
ZNF107	1.43891	6.03893	3.79524	0.000275512	0.0074496	0.146024
RP11-337C18.7	-1.85755	1.10902	-3.79473	0.000275998	0.0074588	0.144398
SLC29A4	2.89262	4.81243	3.79435	0.000276356	0.00746181	0.143201
ENPP2	-2.5809	4.45267	-3.7943	0.000276401	0.00746181	0.14305
PNMT	-1.76324	1.00911	-3.7936	0.000277074	0.00747601	0.14081
CKAP2	2.26147	6.39497	3.79306	0.00027758	0.00748574	0.139124
KLF10	-1.47041	6.6781	-3.79204	0.000278562	0.00750826	0.135867
RP3-416H24.1	-2.69777	3.86858	-3.79175	0.000278843	0.00751186	0.134938
FMN2	2.45028	6.67495	3.79157	0.000279016	0.00751256	0.134367
CTB-113P19.1	-2.31008	2.35732	-3.79108	0.000279484	0.0075212	0.132821
ATP2B4	-1.12707	8.35314	-3.79026	0.000280274	0.0075385	0.130216
JUNB	-2.51615	5.74591	-3.7893	0.000281204	0.00755953	0.127162
PTCHD2	3.0436	5.60782	3.78892	0.000281571	0.00756542	0.125958
UNC13B	-1.71979	7.34653	-3.7887	0.000281776	0.00756697	0.125285
RP11-444D3.1	-2.40833	2.43265	-3.78845	0.000282027	0.00756972	0.124466
RPL32P26	-1.2356	0.405031	-3.7877	0.000282748	0.00758328	0.122111
RP11-66N24.4	2.07703	5.38042	3.78762	0.000282829	0.00758328	0.121847
GPC5	-2.29558	1.87128	-3.78702	0.000283413	0.007591	0.119942
BCL2	1.35929	7.17094	3.78499	0.000285399	0.00763619	0.113502
RP11-111M22.3	1.57745	3.98984	3.78442	0.000285962	0.00764619	0.111686
PPAP2B	-1.91216	5.49532	-3.78419	0.00028619	0.00764619	0.110952
FPR2	-1.69598	0.875042	-3.78415	0.000286222	0.00764619	0.110849
HOXD10	3.50127	3.65399	3.7837	0.000286663	0.00765097	0.109429
RP11-616M22.3	-1.65543	0.831926	-3.78361	0.000286758	0.00765097	0.109124
CTGF	-2.94278	5.88187	-3.78286	0.0002875	0.00766432	0.10674
RP11-328C8.4	-2.2613	2.02186	-3.78267	0.000287685	0.00766448	0.106147
NOS1AP	1.83914	6.27787	3.78255	0.000287806	0.00766448	0.105759
RP11-539E19.1	-1.98919	1.18836	-3.78169	0.000288651	0.00768298	0.103056
CAMK2B	2.49997	6.92768	3.7803	0.000290037	0.00771586	0.0986381
HLA-DRB1	-3.20818	4.09413	-3.77918	0.000291157	0.00774162	0.0950847
AC034187.2	-1.31884	0.634172	-3.77782	0.000292515	0.0077737	0.0907921
AC004381.6	2.38185	4.79032	3.7775	0.000292841	0.00777831	0.089766
OR7G2	-1.06141	0.343218	-3.7759	0.000294455	0.00781135	0.0846971
FAM22G	1.27282	5.82078	3.77587	0.00029448	0.00781135	0.08462
AK4	1.5526	5.69141	3.77581	0.000294543	0.00781135	0.0844224
NDUFAF6	1.57408	6.4483	3.77514	0.00029522	0.00782427	0.0823045
MGP	-2.35527	5.04985	-3.77503	0.000295336	0.00782427	0.0819423
PLSCR4	-1.97644	4.43844	-3.77408	0.000296302	0.00784579	0.0789319
TGFBR3	-1.96886	5.30263	-3.77374	0.000296647	0.00784679	0.0778607
RP11-138I1.2	-1.76142	0.97331	-3.77181	0.000298615	0.00788934	0.0717623
ATF3	-1.96621	5.83671	-3.77171	0.000298718	0.00788934	0.0714449
MT1E	-2.56442	2.23654	-3.77106	0.000299381	0.00790267	0.0694002
PLK2	-2.22641	4.17819	-3.77092	0.000299532	0.00790267	0.0689371
AC007319.1	-2.42422	2.04821	-3.77027	0.000300195	0.00791609	0.0668969
C17orf78	2.46775	2.39776	3.77001	0.000300466	0.00791912	0.0660681
HMGN1	1.25644	7.7458	3.76974	0.000300739	0.00792216	0.0652301
RP11-129B22.1	-2.37934	3.79755	-3.76956	0.000300926	0.00792216	0.0646556
RP11-16C1.3	-1.54732	1.12	-3.76945	0.000301046	0.00792216	0.06429
CDC25C	2.31912	3.8462	3.76926	0.000301241	0.00792321	0.0636933
AP3B2	2.12602	6.66953	3.76797	0.000302568	0.00795404	0.0596391
RP11-313C15.1	2.78601	5.44604	3.76775	0.000302806	0.0079562	0.0589152
TRPM4	-2.63544	4.31413	-3.76556	0.000305088	0.00800887	0.0519955
JPH2	-2.57325	2.38828	-3.76552	0.000305123	0.00800887	0.0518869
PASK	1.20202	7.29317	3.76529	0.000305368	0.00801118	0.0511471
GJA5	-2.72912	3.41583	-3.7639	0.000306822	0.00804519	0.0467696
FAM123C	2.91034	3.64861	3.76351	0.000307236	0.0080519	0.0455285
VAPB	1.54362	7.47044	3.76314	0.000307626	0.00805802	0.0443565
KLRC4	-1.23937	0.539556	-3.7624	0.000308399	0.00807413	0.0420432
USP21	1.48979	6.02654	3.76201	0.00030882	0.00807874	0.0407873
RPL7L1P9	-1.49789	0.735771	-3.76194	0.000308892	0.00807874	0.0405737
RP11-80H8.4	-1.47758	0.680201	-3.76097	0.000309919	0.00810147	0.0375129
WSB2	1.67613	7.15418	3.7608	0.000310098	0.00810201	0.0369806
PDPN	-2.64136	2.79071	-3.76057	0.000310339	0.00810415	0.0362655
ABLIM3	-2.24361	5.02131	-3.75997	0.000310985	0.00811689	0.0343479
CYP2S1	-2.74085	2.23161	-3.75804	0.00031304	0.00815804	0.0282768
EPHA1	-2.48033	4.168	-3.75685	0.000314315	0.00818002	0.0245309
WARS	-1.00859	7.16651	-3.75685	0.000314322	0.00818002	0.0245107
HAS2-AS1	-1.65118	0.854296	-3.75681	0.000314364	0.00818002	0.0243891
PF4	-1.1268	0.410108	-3.75613	0.000315101	0.00819504	0.0222299
TM4SF1	-2.72337	4.69264	-3.75588	0.000315366	0.00819775	0.0214567
B4GALT1	-1.88145	6.48897	-3.75503	0.000316288	0.00821754	0.0187653
RP11-47P18.2	-1.03436	0.406304	-3.75359	0.000317851	0.00825396	0.0142224
PARD6G	1.5683	4.92144	3.75157	0.000320054	0.00830274	0.00785716
RFC4	2.43766	5.3692	3.75105	0.000320622	0.00831324	0.00622487
IQGAP1	-1.1789	8.34485	-3.75074	0.000320957	0.0083177	0.00526344
RP11-629G13.1	2.39836	2.58398	3.74882	0.000323073	0.0083683	-0.00079142
TRIM8	-1.2491	6.26128	-3.74835	0.000323589	0.00837744	-0.002264
ORAI3	-1.80753	1.4021	-3.74793	0.000324061	0.00838541	-0.00360685
PFKP	1.31323	7.33053	3.74679	0.000325327	0.0084139	-0.00719725
WDHD1	1.81214	5.7243	3.74628	0.000325884	0.00842405	-0.008774
PLEK	-2.56718	3.32892	-3.74585	0.000326372	0.00843239	-0.0101518
PSTPIP1	-2.49616	4.22827	-3.74517	0.000327129	0.00844769	-0.0122874
FGFBP2	-1.3335	0.555561	-3.74414	0.000328284	0.00847198	-0.0155357
MECR	1.44253	4.55609	3.74403	0.000328401	0.00847198	-0.0158631
TMEM107	1.98512	4.51629	3.74339	0.000329127	0.00848643	-0.0178974
BX004987.5	-2.60462	4.21428	-3.74243	0.000330205	0.00850564	-0.0209086
RASGRF1	-3.03132	3.05798	-3.74217	0.000330494	0.00850881	-0.0217165
DOLK	-2.05374	3.35605	-3.74193	0.000330773	0.00851169	-0.0224917
ADAMTS18	2.69611	4.50103	3.7397	0.000333296	0.0085723	-0.0294917
RP4-655J12.3	-2.40831	2.31167	-3.73945	0.000333574	0.00857515	-0.0302611
HDAC7	-1.31811	7.32046	-3.73911	0.000333965	0.00858089	-0.0313401
RP11-752G15.3	2.35485	3.29377	3.73867	0.00033447	0.00858956	-0.032733
RAI2	-2.54762	3.00216	-3.73819	0.000335011	0.00859724	-0.0342197
KIAA1217	-1.84862	6.68278	-3.73811	0.000335106	0.00859724	-0.0344817
ZC3H8	2.06192	4.71422	3.73734	0.000335991	0.00861131	-0.0369114
ITGAL	-2.57649	5.42159	-3.73628	0.000337211	0.00863825	-0.0402499
THEMIS	-2.40067	2.03138	-3.73467	0.000339064	0.00866914	-0.0452966
MKI67	2.19865	9.87536	3.73458	0.000339163	0.00866914	-0.0455663
TUBGCP3	1.11125	7.1612	3.73348	0.000340439	0.00869479	-0.0490241
ANXA5	-1.49957	6.27746	-3.73119	0.000343111	0.00875429	-0.0562243
AK1	-1.89942	2.07185	-3.73095	0.000343389	0.00875703	-0.0569717
AATK	-2.12562	5.22123	-3.72983	0.000344703	0.00878368	-0.0604895
CYP4A11	-2.90036	2.68467	-3.72977	0.000344778	0.00878368	-0.0606883
RP11-184J23.2	-1.09659	0.395148	-3.72944	0.000345164	0.00878914	-0.0617194
ITPRIPL2	-1.44494	5.625	-3.72859	0.000346161	0.00881012	-0.0643742
CTB-167B5.2	-2.25715	1.5372	-3.72818	0.000346646	0.00881808	-0.0656642
RFWD2	1.05169	6.36148	3.72737	0.000347608	0.00883816	-0.068216
C1orf127	2.55034	3.04907	3.72667	0.000348432	0.00885318	-0.0703966
BTN3A2	-1.53297	6.05523	-3.72658	0.000348545	0.00885318	-0.0706958
RP11-93B14.6	-1.24428	0.50237	-3.723	0.000352817	0.00895279	-0.081912
AC007283.5	-2.4886	3.90723	-3.72233	0.000353616	0.00896416	-0.0839947
BEX1	3.1015	4.97339	3.72163	0.000354459	0.00898109	-0.0861881
SQRDL	-1.87599	1.39676	-3.72067	0.000355625	0.00900618	-0.0892131
CNTN6	-2.50965	1.93866	-3.72042	0.000355922	0.00900924	-0.0899813
HSPB6	-2.87588	4.55758	-3.72	0.000356429	0.0090176	-0.0912909
RP11-494M8.4	-2.31862	3.37686	-3.71981	0.00035666	0.00901899	-0.0918879
AC087590.3	-1.23757	6.97207	-3.7191	0.000357523	0.00903633	-0.0941116
RP11-384C4.7	-1.17629	0.560465	-3.71885	0.000357831	0.00903964	-0.0949043
INPP5D	-2.10083	5.5113	-3.71723	0.00035981	0.00907898	-0.0999824
EDNRA	-2.44245	3.96482	-3.71699	0.000360098	0.00907898	-0.100719
SIGLEC1	-2.30904	5.09917	-3.71526	0.000362223	0.00912355	-0.106135
THOP1	1.59867	5.82762	3.71461	0.000363024	0.00913552	-0.108171
PPM1E	2.38715	5.30267	3.71431	0.000363397	0.00913552	-0.109115
HS3ST2	-2.35095	1.72059	-3.7141	0.000363657	0.00913552	-0.109773
CNIH2	2.5501	5.05253	3.7141	0.000363659	0.00913552	-0.109778
C17orf81	-1.20511	5.29114	-3.71401	0.00036377	0.00913552	-0.110059
NRM	1.53406	5.85765	3.71327	0.000364679	0.00915189	-0.112357
CAB39L	-2.30382	3.587	-3.71291	0.000365125	0.00915189	-0.113482
DTHD1	-2.59453	2.85581	-3.71214	0.000366084	0.00916662	-0.115897
AC092839.1	-2.12016	1.73471	-3.71156	0.000366809	0.00917564	-0.117717
RP11-1023L17.1	1.35135	9.07881	3.71072	0.000367853	0.00918636	-0.120335
INSM1	2.72566	7.30219	3.71065	0.00036795	0.00918636	-0.120577
PPP1R16B	-1.47569	5.39961	-3.71038	0.00036828	0.0091901	-0.121401
SECISBP2L	-1.50729	7.06874	-3.71009	0.000368641	0.00919013	-0.122302
RIMS2	2.11671	8.23721	3.70893	0.000370099	0.00921873	-0.125938
FLII	-1.3321	6.74711	-3.70889	0.000370148	0.00921873	-0.126059
RP11-367H5.7	-2.23294	1.80789	-3.70834	0.000370842	0.00923027	-0.127782
CORO6	-2.47885	3.03905	-3.70809	0.000371153	0.00923027	-0.128554
RP1-33E13.1	-2.57466	2.84153	-3.70776	0.000371569	0.00923612	-0.129586
BCL3	-2.88224	4.389	-3.70661	0.000373032	0.00925866	-0.133202
CALCOCO2	-1.11166	6.91037	-3.70567	0.000374224	0.00927505	-0.136137
RP13-15E13.1	2.66529	3.18486	3.705	0.000375068	0.00928247	-0.13821
TBC1D2B	-1.04177	7.36107	-3.70452	0.000375682	0.00928954	-0.139716
RP11-739N20.3	-1.22527	0.483685	-3.70413	0.000376184	0.0092966	-0.140946
RP11-536I6.1	-1.74367	0.838863	-3.70353	0.000376951	0.0093029	-0.142819
ATAT1	1.52692	6.58304	3.7035	0.000376984	0.0093029	-0.142901
ACSF2	-2.37903	4.53631	-3.70304	0.000377577	0.0093029	-0.144347
AC120194.1	-2.11216	1.57363	-3.70278	0.000377903	0.0093029	-0.145141
RP11-744N12.2	-1.72205	1.1082	-3.70275	0.000377951	0.0093029	-0.145258
RP11-298E2.2	-1.27409	0.607778	-3.70265	0.000378077	0.0093029	-0.145564
LUM	-3.19099	3.66997	-3.70118	0.000379966	0.00932695	-0.150151
MAB21L1	2.13222	3.68791	3.70086	0.000380378	0.00933259	-0.15115
PZP	-2.40946	4.03164	-3.6998	0.00038174	0.00934806	-0.154438
AC002055.4	1.81602	4.62306	3.69929	0.000382402	0.00935726	-0.156032
UBE2V1P1	-2.04178	1.81401	-3.69923	0.000382482	0.00935726	-0.156224
GNB3	2.27553	4.77988	3.699	0.000382786	0.00936022	-0.156955
MATN3	-2.07444	1.79636	-3.69772	0.000384447	0.00939634	-0.160939
C1S	-1.96564	5.53814	-3.69722	0.000385096	0.00940772	-0.162492
ODF3B	-2.51435	3.44846	-3.69639	0.000386187	0.00942536	-0.165095
CGNL1	-2.01183	6.31672	-3.69589	0.000386844	0.00943643	-0.166658
MAOB	-2.59593	2.52131	-3.69576	0.00038701	0.00943643	-0.167053
C15orf52	-2.82786	4.17658	-3.6942	0.000389063	0.00947294	-0.171921
CEP250	1.20695	8.58078	3.69374	0.000389662	0.009474	-0.173338
CMTM8	-1.91155	1.38886	-3.69331	0.00039024	0.00947844	-0.1747
BRAT1	1.40733	6.7692	3.69299	0.000390657	0.00947844	-0.175683
MARC2	-2.17932	3.5011	-3.6929	0.000390772	0.00947844	-0.175954
LAMC2	-2.5599	4.15159	-3.69256	0.00039122	0.00948447	-0.177008
SCGB3A1	-3.04641	1.86691	-3.69244	0.000391392	0.00948447	-0.177411
S100A16	-2.629	2.88783	-3.69212	0.000391805	0.00948586	-0.178382
PRKCD	-2.38209	4.71056	-3.69211	0.00039182	0.00948586	-0.178418
ARRDC2	-1.9155	5.32566	-3.69132	0.000392867	0.00949772	-0.180873
SLC35E3	1.07608	5.48891	3.68993	0.000394725	0.00952199	-0.185215
MIR221	-1.89147	0.738678	-3.6899	0.000394767	0.00952199	-0.185311
ATP10A	-2.68682	4.41001	-3.68936	0.000395482	0.00953391	-0.186977
MAD2L2	2.06535	5.94	3.68684	0.000398871	0.00960202	-0.194826
CD63	-1.40199	5.70834	-3.68596	0.000400058	0.00962152	-0.197559
GAPDHP32	-1.05068	0.458875	-3.68536	0.000400873	0.00962869	-0.19943
CD163	-2.46038	5.61233	-3.68508	0.000401258	0.00962869	-0.200313
PLEKHG1	-2.04717	5.69852	-3.68442	0.000402154	0.0096402	-0.202366
ARHGAP27	-1.29974	6.11436	-3.68344	0.000403485	0.00966304	-0.205405
RP11-357D18.1	-1.25196	0.488172	-3.68312	0.00040393	0.00966578	-0.206418
RBFA	1.56267	6.09226	3.68308	0.000403977	0.00966578	-0.206526
CEBPB	-2.3553	3.52611	-3.68207	0.000405363	0.00968003	-0.209676
EPN2	-1.01162	6.87069	-3.68195	0.00040552	0.00968003	-0.210031
LILRA6	-2.11951	1.37303	-3.6818	0.000405725	0.00968041	-0.210496
CTA-373H7.7	2.6353	8.78919	3.6815	0.000406137	0.00968187	-0.211431
STARD8	-1.71083	6.1787	-3.68148	0.000406165	0.00968187	-0.211494
COL12A1	-2.16057	6.50302	-3.68087	0.000407008	0.00969294	-0.213401
RP4-599G15.7	-2.17301	1.74512	-3.68046	0.000407575	0.00969515	-0.214681
CD59	-1.88277	6.47259	-3.67988	0.000408371	0.0097028	-0.216476
CHST3	-1.8399	4.9879	-3.67926	0.000409226	0.00971408	-0.218399
GBGT1	-2.24982	3.31153	-3.6789	0.000409722	0.00971706	-0.219512
LDOC1L	1.78636	7.19192	3.67844	0.000410361	0.00972412	-0.220947
STARD13-IT1	-1.60348	1.00808	-3.6782	0.0004107	0.00972412	-0.221706
GUCY1A2	-2.21533	4.14578	-3.67802	0.000410946	0.00972412	-0.222257
ITIH5	-2.70123	3.9013	-3.67779	0.000411263	0.00972412	-0.222966
POMT2	1.20415	6.75851	3.67753	0.000411622	0.00972412	-0.223768
SLC25A19	1.52492	4.71502	3.67745	0.000411736	0.00972412	-0.224023
AC093110.3	-2.52855	3.21856	-3.67731	0.000411931	0.00972412	-0.224458
RP11-399O19.5	-2.59224	4.5901	-3.67671	0.000412773	0.00973501	-0.226336
SAFB	1.48956	7.14104	3.67632	0.000413315	0.00973653	-0.227543
AC016831.7	-2.6591	4.23047	-3.67419	0.000416304	0.00979909	-0.234168
RP11-29G8.3	-2.16293	4.42699	-3.67408	0.000416448	0.00979909	-0.234487
CPNE8	-2.44754	2.66984	-3.67392	0.000416681	0.00980004	-0.235
RP1-29C18.9	-2.83541	2.92255	-3.67351	0.000417247	0.00980375	-0.236249
INA	3.00019	5.77425	3.67337	0.000417445	0.00980375	-0.236686
TRO	1.72016	6.45768	3.67326	0.000417605	0.00980375	-0.237038
FHOD1	-1.49847	5.70446	-3.67263	0.000418499	0.00981977	-0.239004
RAB32	-1.6052	0.861275	-3.6725	0.000418672	0.00981977	-0.239384
TNFRSF10C	-2.03221	1.27381	-3.67203	0.000419348	0.00983112	-0.240867
CCT2	1.25882	6.3791	3.67133	0.000420331	0.00984515	-0.243022
VANGL2	1.56226	7.18611	3.66976	0.000422565	0.00988388	-0.247894
COL4A1	-1.49349	8.32791	-3.66888	0.000423818	0.00990853	-0.250616
DHCR24	-1.45111	7.26001	-3.66862	0.0004242	0.00990853	-0.251445
CDC25A	2.20301	4.04126	3.66832	0.000424627	0.00990946	-0.252371
AC118754.4	-1.24416	0.515973	-3.668	0.000425089	0.00991156	-0.253371
ANXA1	-2.67383	5.74252	-3.66754	0.000425748	0.00991527	-0.254793
SSBP2	1.12875	7.51386	3.66747	0.000425846	0.00991527	-0.255005
CHGB	2.68223	6.02966	3.66637	0.00042742	0.0099474	-0.258399
ZFP36L1	-1.60842	8.41754	-3.66583	0.000428213	0.0099613	-0.260101
RP11-709A23.1	-2.25732	2.19456	-3.66551	0.000428671	0.00996289	-0.261084
FADS3	-1.62964	5.27255	-3.66514	0.0004292	0.00997066	-0.262218
CEACAM6	-3.12237	4.19684	-3.66478	0.000429723	0.00997748	-0.263338
RP1-149A16.12	-2.19222	1.05401	-3.66467	0.000429884	0.00997748	-0.263681
KHDC1	2.48953	4.31666	3.66099	0.000435241	0.0100835	-0.275066
OR52N3P	-1.2598	0.598759	-3.65875	0.00043855	0.0101556	-0.282028
FOXO1	-2.07749	5.69436	-3.65754	0.000440335	0.0101923	-0.285761
FLT1	-1.87428	5.44287	-3.65604	0.000442558	0.0102345	-0.290391
CD69	-2.28454	1.85791	-3.65514	0.000443901	0.0102609	-0.293174
AL358813.2	-2.33812	1.73561	-3.65434	0.000445102	0.0102811	-0.295658
RNF149	-1.4997	5.55211	-3.65264	0.000447647	0.0103288	-0.300898
GDF5OS	-1.14587	0.438691	-3.65165	0.000449144	0.010354	-0.303965
GZMK	-1.57332	0.970655	-3.65098	0.000450161	0.0103645	-0.306046
ERBB2	-1.1781	6.65479	-3.65095	0.000450207	0.0103645	-0.30614
RP11-125O18.1	-1.5637	0.673978	-3.6506	0.00045074	0.0103721	-0.307225
ZNF789	1.27842	6.55615	3.6499	0.000451792	0.0103868	-0.309368
C1QA	-2.60228	4.02765	-3.64978	0.000451987	0.0103868	-0.309765
CTD-2198K18.1	-1.55074	0.847334	-3.6477	0.000455157	0.0104502	-0.316187
RP11-183E9.2	-1.29832	0.538889	-3.6473	0.00045577	0.0104562	-0.317425
ZNF772	1.08838	5.72091	3.646	0.000457761	0.0104912	-0.321429
IRF1	-1.19904	6.68007	-3.64519	0.000459001	0.0105149	-0.323914
HK3	-2.5062	2.74051	-3.64435	0.000460307	0.0105353	-0.326525
TDRD10	-2.10529	1.45864	-3.6438	0.000461148	0.0105421	-0.328203
UNC80	2.41095	7.70097	3.643	0.000462395	0.0105642	-0.330683
RP11-671M22.5	-1.79776	5.17665	-3.64189	0.000464119	0.0105989	-0.334103
DSP	2.31206	9.53264	3.64148	0.000464765	0.0106042	-0.33538
RP11-544M22.1	-2.06881	1.88897	-3.64081	0.000465811	0.0106233	-0.337445
CPED1	-2.54675	3.92755	-3.63957	0.000467749	0.0106627	-0.34126
HPGDS	-1.48875	0.867459	-3.63934	0.000468114	0.0106642	-0.341976
RP11-1102P16.1	2.302	2.98688	3.63913	0.000468438	0.0106642	-0.342611
TOM1L2	-1.07759	6.94434	-3.63796	0.000470291	0.0106826	-0.346239
AP000569.2	2.4964	2.58516	3.63656	0.000472492	0.0107276	-0.350528
SIRPB1	-2.70729	2.47206	-3.63644	0.000472695	0.0107276	-0.350922
CA8	2.56819	5.14241	3.63595	0.000473468	0.0107318	-0.352423
TMEM198B	-1.25165	6.1652	-3.63592	0.000473508	0.0107318	-0.352501
KIAA1731	1.47957	7.39703	3.63458	0.000475651	0.0107756	-0.356648
HIST1H2BD	2.00412	6.23296	3.63445	0.000475861	0.0107756	-0.357054
MCOLN2	-2.41109	2.32004	-3.63404	0.000476511	0.0107844	-0.358307
ZNF714	2.11529	4.58851	3.63327	0.000477738	0.010799	-0.36067
HIST1H4A	2.69598	3.6162	3.63281	0.000478473	0.0108108	-0.362081
CENPI	2.25237	5.19576	3.63186	0.000480006	0.0108343	-0.36502
RP1-310O13.12	2.22837	5.85509	3.63167	0.000480311	0.0108343	-0.365602
RP13-98N21.3	-1.18129	0.404132	-3.63164	0.000480362	0.0108343	-0.365702
C4B	-2.00127	1.41521	-3.63104	0.000481323	0.0108464	-0.367536
AKAP2	-2.38528	2.09668	-3.63085	0.000481628	0.0108485	-0.368118
FCGR2A	-1.98378	5.36427	-3.63046	0.000482256	0.0108579	-0.369316
RP11-87E22.2	-2.51364	2.39466	-3.62938	0.00048401	0.0108926	-0.37265
CHRNA3	2.80084	4.20314	3.62628	0.000489072	0.0109968	-0.382203
ESPL1	1.92428	7.06914	3.62577	0.000489904	0.0110069	-0.383765
FAM168B	1.11437	7.97001	3.62506	0.00049106	0.0110183	-0.38593
KLF8	-2.41573	3.76365	-3.62473	0.000491604	0.0110193	-0.386945
SHISA3	-1.48165	0.684876	-3.62435	0.000492229	0.0110193	-0.388112
MNX1	2.4921	3.08003	3.62401	0.000492789	0.0110222	-0.389156
RP11-297C4.2	-2.11422	1.56801	-3.62146	0.000497022	0.011083	-0.397011
[truncated: 4,293 more rows]
