# Supplementary material for: Analysis of Chromosome 3P Genes Associated With Clinical Staging of Small Cell Lung Cancer and Prediction of Targeted Drugs
Source: Research Square preprint supplement (doi:10.21203/rs.3.rs-1050186/v1), 2021-11-16
Supplement: Supplementary file 25 [file dae4a702d7742d2fd4512ab3.xlsx]

## Sheet: Annotation
MyList	Gene ID	Type	Tax ID	Homologene Gene ID	Homologene Gene Tax ID	GO:0006470 protein dephosphorylation	GO:0007187 G protein-coupled receptor sig	GO:0010633 negative regulation of epithel	GO:0003015 heart process	GO:0009411 response to UV	GO:0008528 G protein-coupled peptide rece	GO:0001726 ruffle	GO:0043269 regulation of ion transport	GO:0046486 glycerolipid metabolic process	GO:0040008 regulation of growth
C3orf14	57415	symbol	H. sapiens	57415	H. sapiens	0	0	0	0	0	0	0	0	0	0
FANCD2	2177	symbol	H. sapiens	2177	H. sapiens	0	0	0	0	1	0	0	0	0	0
CADPS	8618	symbol	H. sapiens	8618	H. sapiens	0	1	0	0	0	0	0	0	0	0
CDC25A	993	symbol	H. sapiens	993	H. sapiens	1	0	0	0	1	0	0	0	0	0
GRM2	2912	symbol	H. sapiens	2912	H. sapiens	0	1	0	0	0	1	0	1	0	0
FGD5	152273	symbol	H. sapiens	152273	H. sapiens	0	0	0	0	0	0	1	0	0	0
RBMS3	27303	symbol	H. sapiens	27303	H. sapiens	0	0	0	0	0	0	0	0	0	0
FYCO1	79443	symbol	H. sapiens	79443	H. sapiens	0	0	0	0	0	0	0	0	0	0
CLEC3B	7123	symbol	H. sapiens	7123	H. sapiens	0	0	1	0	0	0	0	1	0	0
VGLL3	389136	symbol	H. sapiens	389136	H. sapiens	0	0	0	0	0	0	0	0	0	0
VIPR1	7433	symbol	H. sapiens	7433	H. sapiens	0	1	0	0	0	1	0	0	0	0
CISH	1154	symbol	H. sapiens	1154	H. sapiens	0	0	0	0	0	0	0	0	1	1
ALS2CL	259173	symbol	H. sapiens	259173	H. sapiens	0	0	0	0	0	0	0	0	0	0
PRKCD	5580	symbol	H. sapiens	5580	H. sapiens	1	0	0	0	1	1	0	1	1	0
PPARG	5468	symbol	H. sapiens	5468	H. sapiens	0	0	1	1	1	0	0	1	0	1
FRMD4B	23150	symbol	H. sapiens	23150	H. sapiens	0	0	0	0	0	0	1	0	0	0
PRICKLE2	166336	symbol	H. sapiens	166336	H. sapiens	0	0	0	0	0	0	0	0	0	0
RFTN1	23180	symbol	H. sapiens	23180	H. sapiens	0	0	0	0	0	0	0	0	0	1
GNAI2	2771	symbol	H. sapiens	2771	H. sapiens	1	1	0	1	0	0	0	1	0	0
CACNA2D2	9254	symbol	H. sapiens	9254	H. sapiens	0	0	0	1	0	0	0	1	0	0
SH3BP5	9467	symbol	H. sapiens	9467	H. sapiens	0	0	1	0	0	0	0	1	0	0
PLCD1	5333	symbol	H. sapiens	5333	H. sapiens	1	0	0	0	0	0	0	0	1	0
ARHGEF3	50650	symbol	H. sapiens	50650	H. sapiens	0	0	0	0	0	0	0	0	0	0
GPD1L	23171	symbol	H. sapiens	23171	H. sapiens	0	0	0	1	0	0	0	1	1	0
ATXN7	6314	symbol	H. sapiens	6314	H. sapiens	0	0	0	0	1	0	0	0	0	0
CCRL2	9034	symbol	H. sapiens	9034	H. sapiens	0	0	0	0	0	1	0	0	0	0
FAM107A	11170	symbol	H. sapiens	11170	H. sapiens	0	1	0	0	1	0	1	1	0	1
ADAMTS9	56999	symbol	H. sapiens	56999	H. sapiens	0	0	1	0	0	0	0	1	0	0
CMTM8	152189	symbol	H. sapiens	152189	H. sapiens	0	0	0	0	0	1	0	0	0	0
PPM1M	132160	symbol	H. sapiens	132160	H. sapiens	1	0	0	0	0	0	0	0	0	0
PTPRG	5793	symbol	H. sapiens	5793	H. sapiens	1	0	1	0	1	0	0	0	0	0
CCR1	1230	symbol	H. sapiens	1230	H. sapiens	1	1	0	0	0	1	0	1	0	0
GPX1	2876	symbol	H. sapiens	2876	H. sapiens	0	0	1	1	1	0	0	1	1	0

## Sheet: Enrichment
GroupID	Category	Term	Description	LogP	Log(q-value)	InTerm_InList	Genes	Symbols
1_Summary	GO Biological Processes	GO:0006470	protein dephosphorylation	-4.43366	-0.0567497	5/326	993,2771,5580,5793,132160,1230,5333	CDC25A,GNAI2,PRKCD,PTPRG,PPM1M,CCR1,PLCD1
1_Member	GO Biological Processes	GO:0006470	protein dephosphorylation	-4.43366	-0.0567497	5/326	993,2771,5580,5793,132160	CDC25A,GNAI2,PRKCD,PTPRG,PPM1M
1_Member	GO Molecular Functions	GO:0042578	phosphoric ester hydrolase activity	-4.16199	-0.0567497	5/372	993,1230,5333,5793,132160	CDC25A,CCR1,PLCD1,PTPRG,PPM1M
1_Member	GO Biological Processes	GO:0016311	dephosphorylation	-3.59536	0	5/492	993,2771,5580,5793,132160	CDC25A,GNAI2,PRKCD,PTPRG,PPM1M
1_Member	GO Molecular Functions	GO:0004721	phosphoprotein phosphatase activity	-2.92051	0	3/179	993,5793,132160	CDC25A,PTPRG,PPM1M
1_Member	GO Molecular Functions	GO:0016788	hydrolase activity, acting on ester bonds	-2.73488	0	5/764	993,1230,5333,5793,132160	CDC25A,CCR1,PLCD1,PTPRG,PPM1M
1_Member	GO Molecular Functions	GO:0016791	phosphatase activity	-2.37416	0	3/279	993,5793,132160	CDC25A,PTPRG,PPM1M
2_Summary	GO Biological Processes	GO:0007187	G protein-coupled receptor signaling pathway, coupled to cyclic nucleotide second messenger	-3.62668	0	4/260	1230,2771,2912,7433,8618,11170	CCR1,GNAI2,GRM2,VIPR1,CADPS,FAM107A
2_Member	GO Biological Processes	GO:0007187	G protein-coupled receptor signaling pathway, coupled to cyclic nucleotide second messenger	-3.62668	0	4/260	1230,2771,2912,7433	CCR1,GNAI2,GRM2,VIPR1
2_Member	GO Biological Processes	GO:0007188	adenylate cyclase-modulating G protein-coupled receptor signaling pathway	-2.60988	0	3/230	2771,2912,7433	GNAI2,GRM2,VIPR1
2_Member	GO Biological Processes	GO:0007268	chemical synaptic transmission	-2.09152	0	4/684	2771,2912,8618,11170	GNAI2,GRM2,CADPS,FAM107A
2_Member	GO Biological Processes	GO:0098916	anterograde trans-synaptic signaling	-2.09152	0	4/684	2771,2912,8618,11170	GNAI2,GRM2,CADPS,FAM107A
2_Member	GO Biological Processes	GO:0099537	trans-synaptic signaling	-2.07629	0	4/691	2771,2912,8618,11170	GNAI2,GRM2,CADPS,FAM107A
2_Member	GO Biological Processes	GO:0099536	synaptic signaling	-2.05696	0	4/700	2771,2912,8618,11170	GNAI2,GRM2,CADPS,FAM107A
2_Member	KEGG Pathway	hsa04080	Neuroactive ligand-receptor interaction	-2.02704	0	3/373	2771,2912,7433	GNAI2,GRM2,VIPR1
3_Summary	GO Biological Processes	GO:0010633	negative regulation of epithelial cell migration	-3.49005	0	3/114	5468,5793,56999,2876,7123,9467	PPARG,PTPRG,ADAMTS9,GPX1,CLEC3B,SH3BP5
3_Member	GO Biological Processes	GO:0010633	negative regulation of epithelial cell migration	-3.49005	0	3/114	5468,5793,56999	PPARG,PTPRG,ADAMTS9
3_Member	GO Biological Processes	GO:0010631	epithelial cell migration	-3.10333	0	4/358	2876,5468,5793,56999	GPX1,PPARG,PTPRG,ADAMTS9
3_Member	GO Biological Processes	GO:0090132	epithelium migration	-3.08984	0	4/361	2876,5468,5793,56999	GPX1,PPARG,PTPRG,ADAMTS9
3_Member	GO Biological Processes	GO:0090130	tissue migration	-3.06763	0	4/366	2876,5468,5793,56999	GPX1,PPARG,PTPRG,ADAMTS9
3_Member	GO Biological Processes	GO:0001667	ameboidal-type cell migration	-2.6554	0	4/474	2876,5468,5793,56999	GPX1,PPARG,PTPRG,ADAMTS9
3_Member	GO Biological Processes	GO:0043542	endothelial cell migration	-2.37416	0	3/279	2876,5468,56999	GPX1,PPARG,ADAMTS9
3_Member	GO Biological Processes	GO:0010632	regulation of epithelial cell migration	-2.31087	0	3/294	5468,5793,56999	PPARG,PTPRG,ADAMTS9
3_Member	GO Biological Processes	GO:0030336	negative regulation of cell migration	-2.17229	0	3/330	5468,5793,56999	PPARG,PTPRG,ADAMTS9
3_Member	GO Biological Processes	GO:2000146	negative regulation of cell motility	-2.11936	0	3/345	5468,5793,56999	PPARG,PTPRG,ADAMTS9
3_Member	GO Molecular Functions	GO:0019904	protein domain specific binding	-2.07845	0	4/690	2876,5468,7123,9467	GPX1,PPARG,CLEC3B,SH3BP5
3_Member	GO Biological Processes	GO:0051271	negative regulation of cellular component movement	-2.01137	0	3/378	5468,5793,56999	PPARG,PTPRG,ADAMTS9
4_Summary	GO Biological Processes	GO:0003015	heart process	-3.46375	0	4/287	2771,2876,9254,23171,5468	GNAI2,GPX1,CACNA2D2,GPD1L,PPARG
4_Member	GO Biological Processes	GO:0003015	heart process	-3.46375	0	4/287	2771,2876,9254,23171	GNAI2,GPX1,CACNA2D2,GPD1L
4_Member	GO Biological Processes	GO:0003013	circulatory system process	-3.4469	0	5/530	2771,2876,5468,9254,23171	GNAI2,GPX1,PPARG,CACNA2D2,GPD1L
4_Member	GO Biological Processes	GO:0008015	blood circulation	-2.51044	0	4/520	2876,5468,9254,23171	GPX1,PPARG,CACNA2D2,GPD1L
4_Member	GO Biological Processes	GO:0060047	heart contraction	-2.38288	0	3/277	2876,9254,23171	GPX1,CACNA2D2,GPD1L
5_Summary	GO Biological Processes	GO:0009411	response to UV	-3.16764	0	3/147	993,2876,5580,5468,2177,5793,6314,11170	CDC25A,GPX1,PRKCD,PPARG,FANCD2,PTPRG,ATXN7,FAM107A
5_Member	GO Biological Processes	GO:0009411	response to UV	-3.16764	0	3/147	993,2876,5580	CDC25A,GPX1,PRKCD
5_Member	GO Biological Processes	GO:0050728	negative regulation of inflammatory response	-2.87267	0	3/186	2876,5468,5580	GPX1,PPARG,PRKCD
5_Member	GO Biological Processes	GO:0009314	response to radiation	-2.74091	0	4/449	993,2177,2876,5580	CDC25A,FANCD2,GPX1,PRKCD
5_Member	GO Biological Processes	GO:0051129	negative regulation of cellular component organization	-2.69069	0	5/782	2876,5580,5793,6314,11170	GPX1,PRKCD,PTPRG,ATXN7,FAM107A
5_Member	GO Biological Processes	GO:0050727	regulation of inflammatory response	-2.48964	0	4/527	2177,2876,5468,5580	FANCD2,GPX1,PPARG,PRKCD
5_Member	GO Biological Processes	GO:0031348	negative regulation of defense response	-2.45051	0	3/262	2876,5468,5580	GPX1,PPARG,PRKCD
5_Member	GO Biological Processes	GO:0034599	cellular response to oxidative stress	-2.26271	0	3/306	2177,2876,5580	FANCD2,GPX1,PRKCD
5_Member	GO Biological Processes	GO:0009416	response to light stimulus	-2.20906	0	3/320	993,2876,5580	CDC25A,GPX1,PRKCD
5_Member	GO Biological Processes	GO:1902903	regulation of supramolecular fiber organization	-2.03975	0	3/369	2876,5580,6314	GPX1,PRKCD,ATXN7
5_Member	GO Biological Processes	GO:0097435	supramolecular fiber organization	-2.02956	0	4/713	2876,5580,6314,11170	GPX1,PRKCD,ATXN7,FAM107A
5_Member	GO Biological Processes	GO:0032102	negative regulation of response to external stimulus	-2.00207	0	3/381	2876,5468,5580	GPX1,PPARG,PRKCD
6_Summary	GO Molecular Functions	GO:0008528	G protein-coupled peptide receptor activity	-3.15909	0	3/148	1230,7433,9034,2912,5580,152189	CCR1,VIPR1,CCRL2,GRM2,PRKCD,CMTM8
6_Member	GO Molecular Functions	GO:0008528	G protein-coupled peptide receptor activity	-3.15909	0	3/148	1230,7433,9034	CCR1,VIPR1,CCRL2
6_Member	GO Molecular Functions	GO:0001653	peptide receptor activity	-3.1255	0	3/152	1230,7433,9034	CCR1,VIPR1,CCRL2
6_Member	Reactome Gene Sets	R-HSA-500792	GPCR ligand binding	-2.67883	0	4/467	1230,2912,7433,9034	CCR1,GRM2,VIPR1,CCRL2
6_Member	GO Biological Processes	GO:0060326	cell chemotaxis	-2.25879	0	3/307	1230,5580,9034	CCR1,PRKCD,CCRL2
6_Member	GO Biological Processes	GO:0006935	chemotaxis	-2.18218	0	4/644	1230,5580,9034,152189	CCR1,PRKCD,CCRL2,CMTM8
6_Member	GO Biological Processes	GO:0042330	taxis	-2.17749	0	4/646	1230,5580,9034,152189	CCR1,PRKCD,CCRL2,CMTM8
7_Summary	GO Cellular Components	GO:0001726	ruffle	-2.94161	0	3/176	11170,23150,152273	FAM107A,FRMD4B,FGD5
7_Member	GO Cellular Components	GO:0001726	ruffle	-2.94161	0	3/176	11170,23150,152273	FAM107A,FRMD4B,FGD5
8_Summary	GO Biological Processes	GO:0043269	regulation of ion transport	-2.91327	0	5/696	1230,2771,5580,9254,23171,2912,56999,5468,7123,2876,9467,11170	CCR1,GNAI2,PRKCD,CACNA2D2,GPD1L,GRM2,ADAMTS9,PPARG,CLEC3B,GPX1,SH3BP5,FAM107A
8_Member	GO Biological Processes	GO:0043269	regulation of ion transport	-2.91327	0	5/696	1230,2771,5580,9254,23171	CCR1,GNAI2,PRKCD,CACNA2D2,GPD1L
8_Member	Reactome Gene Sets	R-HSA-418594	G alpha (i) signalling events	-2.90499	0	4/405	1230,2771,2912,5580	CCR1,GNAI2,GRM2,PRKCD
8_Member	KEGG Pathway	ko04062	Chemokine signaling pathway	-2.89977	0	3/182	1230,2771,5580	CCR1,GNAI2,PRKCD
8_Member	GO Biological Processes	GO:1901136	carbohydrate derivative catabolic process	-2.78247	0	3/200	5580,23171,56999	PRKCD,GPD1L,ADAMTS9
8_Member	KEGG Pathway	hsa04062	Chemokine signaling pathway	-2.77013	0	3/202	1230,2771,5580	CCR1,GNAI2,PRKCD
8_Member	GO Biological Processes	GO:0032869	cellular response to insulin stimulus	-2.62062	0	3/228	2771,5468,5580	GNAI2,PPARG,PRKCD
8_Member	Reactome Gene Sets	R-HSA-76002	Platelet activation, signaling and aggregation	-2.44588	0	3/263	2771,5580,7123	GNAI2,PRKCD,CLEC3B
8_Member	GO Biological Processes	GO:0046434	organophosphate catabolic process	-2.41394	0	3/270	2876,5580,23171	GPX1,PRKCD,GPD1L
8_Member	GO Biological Processes	GO:0043270	positive regulation of ion transport	-2.37416	0	3/279	1230,5580,23171	CCR1,PRKCD,GPD1L
8_Member	GO Biological Processes	GO:0032868	response to insulin	-2.36983	0	3/280	2771,5468,5580	GNAI2,PPARG,PRKCD
8_Member	GO Biological Processes	GO:1902532	negative regulation of intracellular signal transduction	-2.36836	0	4/570	2771,2876,5580,23171	GNAI2,GPX1,PRKCD,GPD1L
8_Member	GO Biological Processes	GO:0072593	reactive oxygen species metabolic process	-2.36121	0	3/282	2771,2876,5580	GNAI2,GPX1,PRKCD
8_Member	GO Biological Processes	GO:0032409	regulation of transporter activity	-2.35693	0	3/283	5468,5580,23171	PPARG,PRKCD,GPD1L
8_Member	GO Biological Processes	GO:0051348	negative regulation of transferase activity	-2.29055	0	3/299	5468,5580,9467	PPARG,PRKCD,SH3BP5
8_Member	GO Biological Processes	GO:0045936	negative regulation of phosphate metabolic process	-2.28718	0	4/601	2771,5580,9467,23171	GNAI2,PRKCD,SH3BP5,GPD1L
8_Member	GO Biological Processes	GO:0010563	negative regulation of phosphorus metabolic process	-2.28464	0	4/602	2771,5580,9467,23171	GNAI2,PRKCD,SH3BP5,GPD1L
8_Member	GO Biological Processes	GO:0031400	negative regulation of protein modification process	-2.21305	0	4/631	2771,5580,9467,23171	GNAI2,PRKCD,SH3BP5,GPD1L
8_Member	GO Biological Processes	GO:0071375	cellular response to peptide hormone stimulus	-2.18319	0	3/327	2771,5468,5580	GNAI2,PPARG,PRKCD
8_Member	GO Biological Processes	GO:0032870	cellular response to hormone stimulus	-2.13379	0	4/665	2771,5468,5580,11170	GNAI2,PPARG,PRKCD,FAM107A
8_Member	GO Biological Processes	GO:0010959	regulation of metal ion transport	-2.00826	0	3/379	1230,2771,23171	CCR1,GNAI2,GPD1L
9_Summary	GO Biological Processes	GO:0046486	glycerolipid metabolic process	-2.79113	0	4/435	1154,2876,5333,23171,5580	CISH,GPX1,PLCD1,GPD1L,PRKCD
9_Member	GO Biological Processes	GO:0046486	glycerolipid metabolic process	-2.79113	0	4/435	1154,2876,5333,23171	CISH,GPX1,PLCD1,GPD1L
9_Member	GO Biological Processes	GO:0006644	phospholipid metabolic process	-2.70953	0	4/458	1154,5333,5580,23171	CISH,PLCD1,PRKCD,GPD1L
9_Member	GO Biological Processes	GO:0006650	glycerophospholipid metabolic process	-2.10908	0	3/348	1154,5333,23171	CISH,PLCD1,GPD1L
10_Summary	GO Biological Processes	GO:0040008	regulation of growth	-2.17282	0	4/648	1154,5468,11170,23180	CISH,PPARG,FAM107A,RFTN1
10_Member	GO Biological Processes	GO:0040008	regulation of growth	-2.17282	0	4/648	1154,5468,11170,23180	CISH,PPARG,FAM107A,RFTN1
